# Supplementary material for: Total syntheses ofGanoderma-derived meroterpenoids, (−)-oregonensin A, (−)-chizhine E, (−)-applanatumol U, and (−)-ent-fornicin A
Source: Royal Society of Chemistry journal article supplement (doi:10.1039/d2ob01839j), 2022-01-01
Supplement: d2ob01839j1.pdf [file d2ob01839j1.pdf]

Supporting Information

## **Total Syntheses of *Ganoderma*-derived Meroterpenoids, (–)-Oregonensin A, (–)-Chizhine E, (–)-Applanatumol U, and (–)-*ent*-Fornicin A**

Kazuki Hori, Shogo Kamo\*, and Kazuyuki Sugita\*

Department of Synthetic Medicinal Chemistry, Faculty of Pharmaceutical Sciences, Hoshi University, 2-4-41 Ebara, Shinagawa-ku, Tokyo 142-8501, Japan

### **Index**

|                                                                   |    |
|-------------------------------------------------------------------|----|
| <b>1. General</b>                                                 | 2  |
| <b>2. Experimental Procedures</b>                                 | 2  |
| <b>3. Additional Results</b>                                      | 13 |
| <b>4. <sup>1</sup>H and <sup>13</sup>C NMR spectroscopic data</b> | 14 |
| <b>5. References</b>                                              | 61 |

All reactions were carried out in a round-bottom flask or a test tube fitted with a 3-way glass stopcock under an Ar atmosphere unless otherwise stated. Reagents were purchased from commercial suppliers and used as received unless otherwise noted. All work-up and purification procedures were carried out with reagent-grade solvents under ambient atmosphere. Analytical thin layer chromatography (TLC) was performed on Merck precoated TLC plates (silica gel 60 F<sub>254</sub>, 0.25 mm). Flash chromatography was performed using silica gel CHROMATOREX PSQ60B (neutral, 60 μm; Fuji Silysia Chemical LTD.). Melting point (Mp) data were determined using a Yanaco MP apparatus and were uncorrected. Optical rotation was measured on JASCO P-2200. IR spectra were recorded on a JASCO FT/IR 4100 spectrometer. <sup>1</sup>H and <sup>13</sup>C NMR spectra were recorded on JEOL ECA-600 spectrometers. Chemical shift values are reported in δ (ppm) relative to residual solvent signals (CDCl<sub>3</sub>: 7.26 ppm for <sup>1</sup>H and 77.00 ppm for <sup>13</sup>C, acetone-*d*<sub>6</sub>: 2.04 ppm for <sup>1</sup>H and 29.8 ppm for <sup>13</sup>C, CD<sub>3</sub>OD: 3.30 ppm for <sup>1</sup>H and 49.0 ppm for <sup>13</sup>C). NMR data are reported as follows: chemical shifts, multiplicity (s: singlet, d: doublet, t: triplet, q: quartet, quin: quintet, m: multiplet, br: broad signal), coupling constant, and integration. High-resolution mass spectra (ESI-TOF) were measured on JEOL JMS-T100LP. Analytical chiral HPLC was performed by LC-NetII/ADC system (JASCO, pump: PU-4180; UV detector: MD4017) with CHIRAL ART Cellulose-SB (YMC, 4.6 mm × 250 mm).

## 2. Experimental Procedures

### Known compound 13

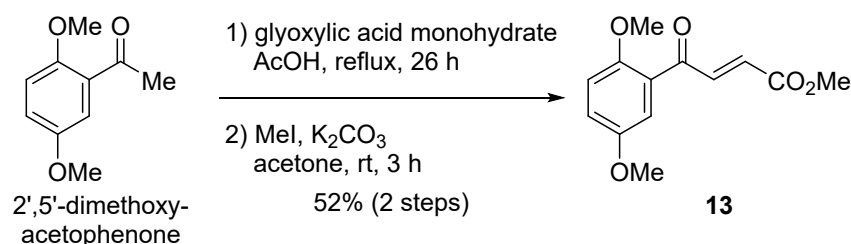

Compound **13** was prepared according to the literature reported by Wang and co-workers with slight modification<sup>S1</sup>.

2',5'-dimethoxyacetophenone (2.50 g, 13.9 mmol) and glyoxylic acid monohydrate (1.35 g, 14.7 mmol) were dissolved in acetic acid (28 mL) at rt. After the mixture was refluxed for 26 h, the reaction mixture was cooled to rt and concentrated to give a crude carboxylic acid which was used next reaction without further purification.

To a suspension of the crude carboxylic acid (prepared above) and K<sub>2</sub>CO<sub>3</sub> (9.63g, 69.7 mmol) in acetone (46 mL) was added MeI (2.2 mL, 35.3 mmol) at rt. The mixture was stirred for 3 h at rt. The reaction mixture was quenched by the addition of sat. NH<sub>4</sub>Cl aq. and diluted with EtOAc. The aqueous layer was extracted with EtOAc. The combined organic solution was washed with brine, dried over Na<sub>2</sub>SO<sub>4</sub>, filtered, and concentrated to give a residue. The residue was purified by flash column chromatography (hexane/EtOAc = 9/1 to 7/3) to give **13** (1.79 g, 7.15 mmol, 52%) as an orange solid.

<sup>1</sup>H NMR (600 MHz, CDCl<sub>3</sub>) δ 7.83 (d, *J* = 15.6 Hz, 1H), 7.23 (d, *J* = 3.6 Hz, 1H), 7.08 (dd, *J* = 9.0, 3.6 Hz, 1H), 6.93 (d, *J* = 9.0 Hz, 1H), 6.76 (d, *J* = 15.6 Hz, 1H), 3.87 (s, 3H), 3.82 (s, 3H), 3.80 (s, 3H); <sup>13</sup>C NMR (150 MHz, CDCl<sub>3</sub>) δ 190.7, 166.4, 153.60, 153.56, 141.1, 129.4, 127.6, 121.2, 114.1, 113.3, 56.2, 55.8, 52.1.

### methyl 4-(2-hydroxy-5-methoxyphenyl)-4-oxo-2-(phenylthio)butanoate (**14**)

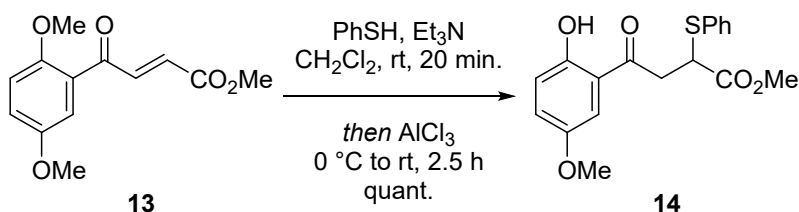

To a solution of **13** (1.70 g, 6.79 mmol) in  $\text{CH}_2\text{Cl}_2$  (68 mL) was added  $\text{Et}_3\text{N}$  (94.2  $\mu\text{L}$ , 680  $\mu\text{mol}$ ) and PhSH (728  $\mu\text{L}$ , 7.14 mmol) at rt. The mixture was stirred for 20 min at rt and then cooled to 0 °C. To the solution was added  $\text{AlCl}_3$  (3.21 g, 24.1 mmol) and the resulting mixture was stirred for further 2.5 h at rt. The reaction mixture was poured into ice cold 1 M HCl aq. (100 mL) and diluted with  $\text{CH}_2\text{Cl}_2$ . The aqueous layer was extracted with  $\text{CH}_2\text{Cl}_2$ . The combined organic solution was washed with brine, dried over  $\text{Na}_2\text{SO}_4$ , filtered, and concentrated to give **14** (2.39 g, 6.90 mmol, quant.) as a yellow solid.

Mp = 50–53 °C; IR (KBr)  $\nu_{\text{max}}$  = 3451, 2948, 2912, 2842, 1735, 1647, 1485, 1341, 1272, 1232, 1164,  $\text{cm}^{-1}$ ;  $^1\text{H}$  NMR (600 MHz,  $\text{CDCl}_3$ )  $\delta$  11.48 (s, 1H), 7.54–7.51 (m, 2H), 7.36–7.34 (m, 3H), 7.13–7.11 (m, 2H), 6.92 (dd,  $J$  = 8.4, 1.2 Hz, 1H), 4.22 (dd,  $J$  = 9.6, 4.2 Hz, 1H), 3.80 (s, 3H), 3.71 (s, 3H), 3.69 (dd,  $J$  = 18.0, 9.6 Hz, 1H), 3.41 (dd,  $J$  = 18.0, 4.2 Hz, 1H);  $^{13}\text{C}$  NMR (150 MHz,  $\text{CDCl}_3$ )  $\delta$  201.9, 171.8, 156.8, 151.8, 133.8 (2C), 132.0, 129.1 (2C), 128.8, 124.8, 119.5, 118.3, 112.1, 56.0, 52.6, 44.9, 40.7; HRMS (ESI)  $m/z$  calcd. for  $\text{C}_{18}\text{H}_{19}\text{O}_5\text{S}$  ( $[\text{M}+\text{H}]^+$ ) 347.0948, found 347.0953.

#### methyl 4-(2-((*tert*-butyldimethylsilyl)oxy)-5-methoxyphenyl)-4-oxo-2-(phenylthio)butanoate (**12**)

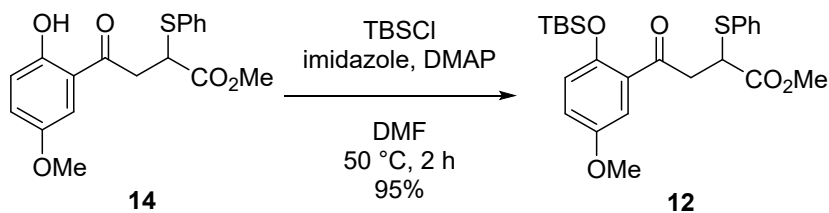

To a solution of **14** (2.35 g, 6.78 mmol) in DMF (22.5 mL) was added imidazole (1.15 g, 16.9 mmol), DMAP (82.7 mg, 677  $\mu\text{mol}$ ), and TBSCl (1.25 g, 8.29 mmol) at rt. The mixture was stirred for 2 h at 50 °C. The reaction mixture was cooled to rt and quenched by the addition of sat.  $\text{NH}_4\text{Cl}$  aq. and diluted with EtOAc. The aqueous layer was extracted with EtOAc. The combined organic solution was washed with brine, dried over  $\text{Na}_2\text{SO}_4$ , filtered, and concentrated to give a residue. The residue was purified by flash column chromatography (hexane/EtOAc = 9/1 to 4/1) to give **12** (2.98 g, 6.47 mmol, 95%) as a yellow solid.

Mp = 57–59 °C; IR (KBr)  $\nu_{\text{max}}$  = 2952, 2933, 2891, 2858, 1730, 1663, 1489, 1419, 1321, 1274, 1224, 1153, 1019, 915, 839, 788, 751  $\text{cm}^{-1}$ ;  $^1\text{H}$  NMR (600 MHz,  $\text{CDCl}_3$ )  $\delta$  7.49–7.47 (m, 2H), 7.31–7.29 (m, 3H), 7.17 (d,  $J$  = 3.0 Hz, 1H), 6.94 (dd,  $J$  = 9.0, 3.0 Hz, 1H), 6.80 (d,  $J$  = 9.0 Hz, 1H), 4.20 (dd,  $J$  = 9.6, 4.8 Hz, 1H), 3.76 (s, 3H), 3.70 (dd,  $J$  = 18.6, 9.6 Hz, 1H), 3.68 (s, 3H), 3.51 (dd,  $J$  = 10.6, 4.8 Hz, 1H), 0.99 (s, 9H), 0.27 (s, 3H), 0.25 (s, 3H);  $^{13}\text{C}$  NMR (150 MHz,  $\text{CDCl}_3$ )  $\delta$  198.7, 172.2, 153.6, 149.3, 133.2 (2C), 132.8, 129.2, 129.0 (2C), 128.2, 121.2, 120.9, 112.9, 55.7, 52.3, 45.9, 45.7, 26.0 (3C), 18.5, –3.9 (2C); HRMS (ESI)  $m/z$  calcd. for  $\text{C}_{24}\text{H}_{33}\text{O}_5\text{SSi}$  ( $[\text{M}+\text{H}]^+$ ) 461.18120, found 461.1802.

#### (5*S*)-5-(2-((*tert*-butyldimethylsilyl)oxy)-5-methoxyphenyl)-3-(phenylthio)dihydrofuran-2(3*H*)-one (**11**)

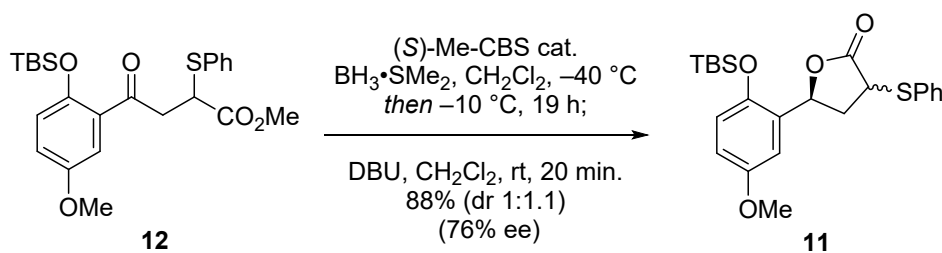

To a solution of **11** (465.3 mg, 1.01 mmol) and in  $\text{CH}_2\text{Cl}_2$  (10.0 mL) was added (*S*)-Me-CBS catalyst (1 M in toluene, 400  $\mu\text{L}$ , 400  $\mu\text{mol}$ ) at rt. After the mixture was cooled to  $-40\text{ }^\circ\text{C}$ ,  $\text{BH}_3\cdot\text{SMe}_2$  (90%, 120  $\mu\text{L}$ , 1.14 mmol) was added dropwise via syringe. The solution was stirred for 19 h at  $-10\text{ }^\circ\text{C}$ . The reaction mixture was quenched by the addition of MeOH and concentrated to give a crude alcohol. To a solution of the crude alcohol in  $\text{CH}_2\text{Cl}_2$  (10.0 mL) was added DBU (30  $\mu\text{L}$ , 201  $\mu\text{mol}$ ) at rt. After being stirred for 20 min at rt, the solution was concentrated to give a residue. The residue was purified by flash column chromatography (hexane/EtOAc = 19/1 to 17/3) to give **11** (382.5 mg, 888  $\mu\text{mol}$ , 88%, dr = 1:1.1) as a yellow oil.

$[\alpha]_{\text{D}}^{24} -8.3$  (*c* 0.40,  $\text{CHCl}_3$ ); IR (neat)  $\nu_{\text{max}} = 2953, 2934, 2895, 2858, 1779, 1497, 1437, 1270, 1175, 1041, 904, 840\text{ cm}^{-1}$ ;  $^1\text{H NMR}$  (600 MHz,  $\text{CDCl}_3$ , diastereomer mixture, dr = 1:1.1)  $\delta$  7.58-7.54 (m, 4.2H), 7.36-7.31 (m, 6.3H), 6.84 (brd,  $J = 2.4\text{ Hz}$ , 1H), 6.74-6.69 (m, 4.2H), 6.66 (brd,  $J = 1.2\text{ Hz}$ , 1.1H), 5.78 (dd,  $J = 7.8, 6.6\text{ Hz}$ , 1H), 5.65 (dd,  $J = 9.0, 6.0\text{ Hz}$ , 1.1H), 4.06 (dd,  $J = 10.8, 9.0\text{ Hz}$ , 1H), 3.97 (dd,  $J = 8.4, 4.8\text{ Hz}$ , 1.1H), 3.75 (s, 3H), 3.70 (s, 3.3H), 3.05-3.00 (m, 1.1H), 2.72-2.68 (m, 1H), 2.53-2.48 (m, 1H), 2.12-2.06 (m, 1.1H), 1.00 (s, 9H), 0.98 (s, 9.9H), 0.25 (s, 3H), 0.23 (s, 3H), 0.22 (s, 3.3H), 0.20 (s, 3.3H);  $^{13}\text{C NMR}$  (150 MHz,  $\text{CD}_3\text{OD}$ , diastereomer mixture, dr = 1:1.1)  $\delta$  176.9, 176.4, 155.7, 155.6, 147.4, 147.3, 134.6 (2C), 133.9 (2C), 133.6, 133.5, 131.2, 131.1, 130.4 (2C), 130.3 (2C), 129.6, 129.5, 120.5, 120.4, 115.6, 115.4, 112.3, 112.1, 77.3, 76.2, 56.13, 56.10, 47.1, 46.3, 38.5, 38.2, 26.40 (3C), 26.37 (3C), 19.1 (2C), -3.85, -3.90, -4.1, -4.2; HRMS (ESI)  $m/z$  calcd. for  $\text{C}_{23}\text{H}_{30}\text{O}_4\text{SSiNa}$  ( $[\text{M}+\text{Na}]^+$ ) 453.1526, found 453.1538.

The enantiomeric excess of (-)-**11** was determined by chiral HPLC analysis [CHIRAL ART Cellulose-SB (4.6  $\times$  250 mm), hexane/2-propanol = 90/10 v/v, 1.0 mL/min, UV 254 nm, RT,  $t_{\text{R}1} = 6.1\text{ min}$  (39.0%),  $t_{\text{R}2} = 6.4\text{ min}$  (5.3%),  $t_{\text{R}3} = 7.0\text{ min}$  (6.4%),  $t_{\text{R}4} = 7.9\text{ min}$  (49.2%)] to be 76% ee.

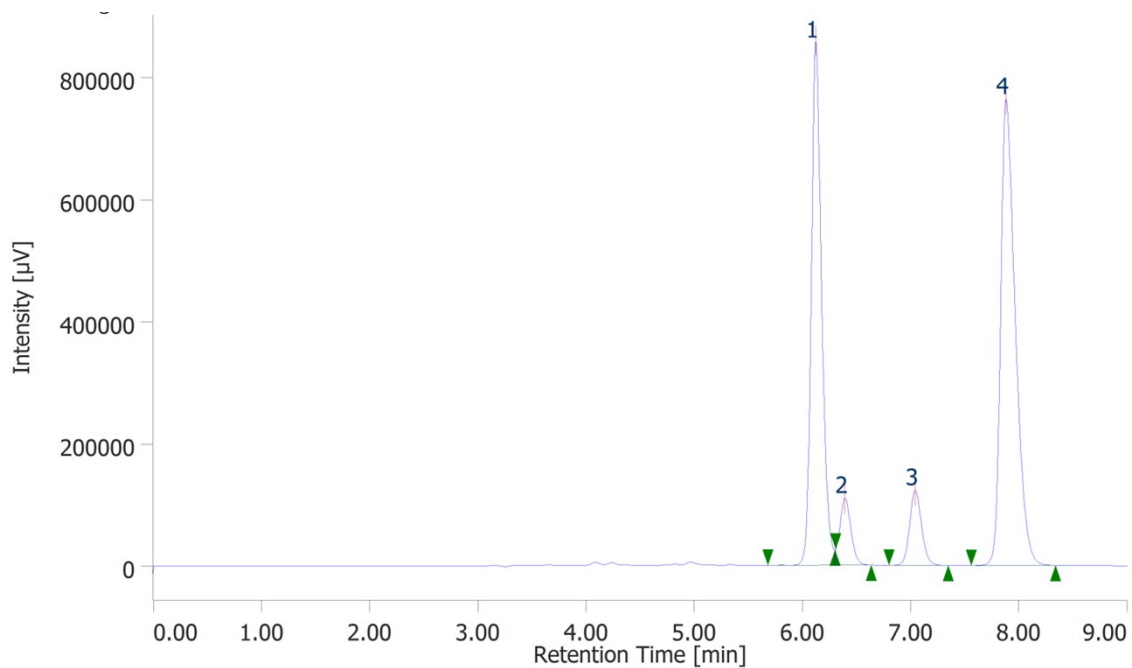

**Peak Information**

| # | tR [min] | Area [µV·sec] | Area%  | Height% | Symmetry Factor |
|---|----------|---------------|--------|---------|-----------------|
| 1 | 6.120    | 5697023       | 38.999 | 46.267  | 1.247           |
| 2 | 6.390    | 779728        | 5.338  | 5.922   | N/A             |
| 3 | 7.040    | 939959        | 6.435  | 6.637   | 1.108           |
| 4 | 7.877    | 7191331       | 49.229 | 41.174  | 1.489           |

Racemic **11** was prepared from compound **12** *via* reduction of ketone using  $\text{NaBH}_4$  and subsequent lactonization mediated by DBU.

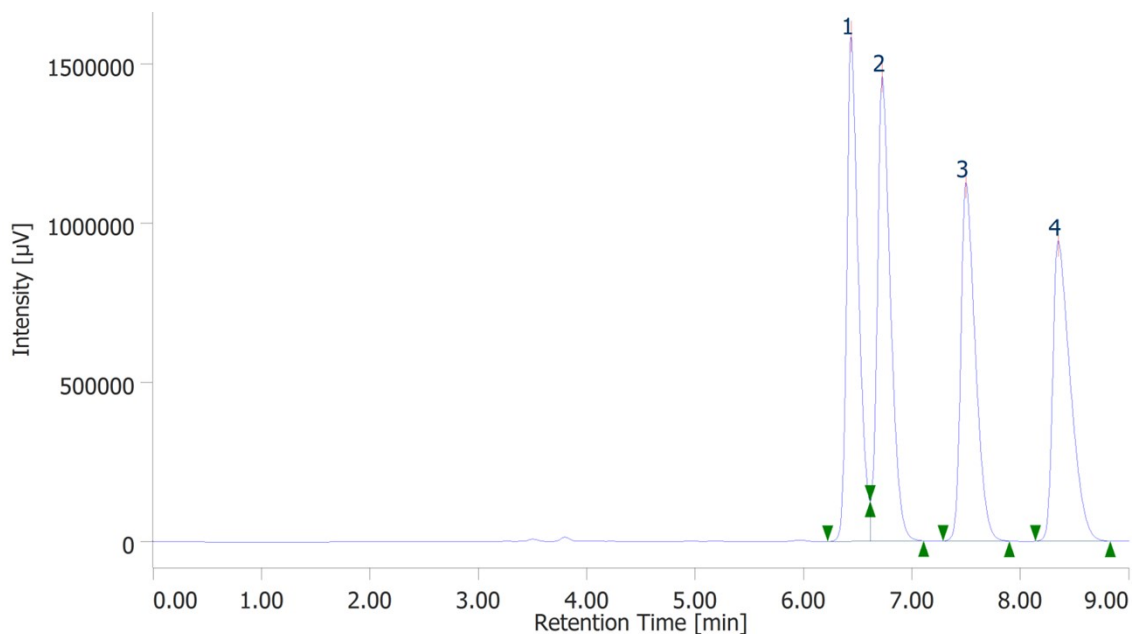

**Peak Info.**

| # | tR [min] | Area [µV·sec] | Area%  | Height% | Symmetry Factor |
|---|----------|---------------|--------|---------|-----------------|
| 1 | 6.433    | 11845166      | 26.147 | 31.004  | N/A             |
| 2 | 6.723    | 12330734      | 27.219 | 28.519  | N/A             |
| 3 | 7.493    | 10481107      | 23.136 | 22.029  | 1.530           |
| 4 | 8.343    | 10644853      | 23.498 | 18.448  | 1.812           |

**(5S)-5-(2-((*tert*-butyldimethylsilyl)oxy)-5-methoxyphenyl)-3-(4-methylpent-3-en-1-yl)-3-(phenylthio)dihydrofuran-2(3H)-one (8)**

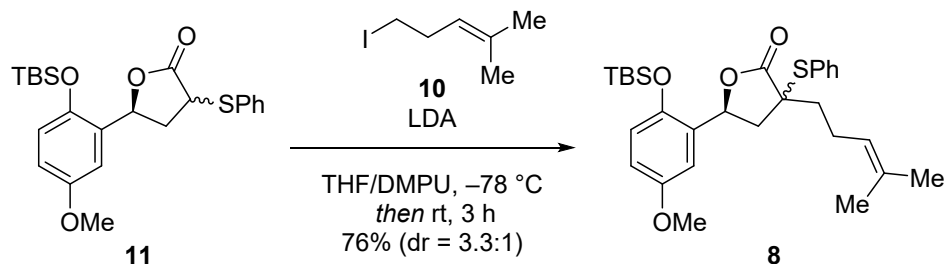

To a solution of **11** (210.5 mg, 489  $\mu\text{mol}$ ) in THF (2.4 mL) was added LDA (2.0 M in THF, prepared from  $i\text{Pr}_2\text{NH}$  and  $n\text{BuLi}$ , 320  $\mu\text{L}$ , 640  $\mu\text{mol}$ ) dropwise via syringe at  $-78\text{ }^{\circ}\text{C}$ . The mixture was stirred for 30 min at  $0\text{ }^{\circ}\text{C}$ , and then cooled to  $-78\text{ }^{\circ}\text{C}$ . To the reaction mixture was added a solution of **10**<sup>S2</sup> (345  $\mu\text{L}$ , 2.46 mmol) in DMPU (1.9 mL) dropwise via syringe at  $-78\text{ }^{\circ}\text{C}$ . The solution was stirred for 3 h at rt. The reaction mixture was quenched by the addition of sat.  $\text{NH}_4\text{Cl}$  aq. and diluted with EtOAc. The aqueous layer was extracted with EtOAc. The combined organic solution was washed with brine, dried over  $\text{Na}_2\text{SO}_4$ , filtered, and concentrated to give a residue. The residue was purified by flash column chromatography (hexane/EtOAc = 99/1 to 9/1) to give **8** (191.3 mg, 373  $\mu\text{mol}$ , 76%, dr = 3.3:1) as a yellow oil.

$[\alpha]_{\text{D}}^{23} -25.4$  ( $c$  0.50,  $\text{CHCl}_3$ ); IR (neat)  $\nu_{\text{max}} = 3059, 2954, 2933, 2858, 1771, 1496, 1469, 1438, 1268, 1177, 1038, 916, 887, 839, 809\text{ cm}^{-1}$ ;  $^1\text{H NMR}$  (600 MHz,  $\text{CDCl}_3$ , diastereomer mixture, dr = 3.3:1)  $\delta$  7.58-7.54 (m, 2.6H), 7.44-7.31 (m, 3.9H), 6.92 (d,  $J = 3.0\text{ Hz}$ , 1H), 6.76-6.72 (m, 2H), 6.67 (s, 0.3H), 6.668 (brs, 0.3H), 6.43 (brs, 0.3H), 5.94 (dd,  $J = 10.2, 6.0\text{ Hz}$ , 1H), 5.62 (dd,  $J = 7.8, 8.4\text{ Hz}$ , 0.3H), 5.09-5.07 (m, 0.3H), 5.04-5.01 (m, 1H), 3.76 (s, 3H), 3.65 (s, 0.9H), 2.81 (dd,  $J = 13.8, 7.8\text{ Hz}$ , 0.3H), 2.69 (dd,  $J = 13.8, 6.0\text{ Hz}$ , 1H), 2.37-2.31 (m, 1.3H), 2.25-2.13 (m, 1.6H), 2.02-1.95 (m, 1H), 1.94-1.81 (m, 1.6H), 1.70 (s, 0.9H), 1.70-1.65 (m, 1H), 1.65 (s, 3H), 1.63 (s, 0.9H), 1.58 (s, 3H), 1.05 (s, 9H), 0.99 (s, 2.7H), 0.27 (s, 3H), 0.25 (s, 3H), 0.23 (s, 0.9H), 0.19 (s, 0.9H);  $^{13}\text{C NMR}$  (150 MHz,  $\text{CDCl}_3$ , diastereomer mixture, dr = 3.3:1)  $\delta$  176.8, 174.9, 154.2, 153.9, 146.0, 145.6, 137.1 (2C), 137.0 (2C), 133.2, 132.6, 130.4, 130.2, 129.9, 129.7, 129.2 (2C), 129.0, 128.9 (3C), 122.7, 122.3, 119.1, 118.7, 114.8, 114.3, 110.7, 110.4, 74.1, 73.1, 56.3, 55.8, 55.7, 55.6, 42.4, 40.7, 36.2, 34.2, 25.9 (3C), 25.8, 25.7, 25.6 (3C), 23.5, 23.2, 18.2, 18.2, 17.76, 17.74, -3.9, -4.0, -4.3, -4.4; HRMS (ESI)  $m/z$  calcd. for  $\text{C}_{29}\text{H}_{41}\text{O}_4\text{SSi}$  ( $[\text{M}+\text{H}]^+$ ) 513.2489, found 513.2494.

**(S)-5-(2-((*tert*-butyldimethylsilyl)oxy)-5-methoxyphenyl)-3-(4-methylpent-3-en-1-yl)furan-2(5H)-one (6)**

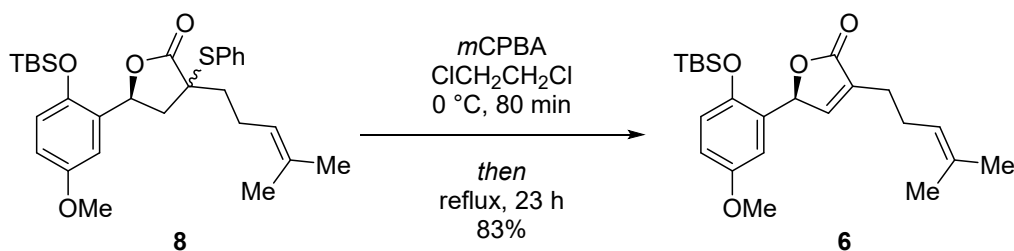

To a solution of **8** (129.0 mg, 252  $\mu\text{mol}$ ) in dichloroethane (2.5 mL) was added  $m\text{CPBA}$  (65%, 70.2 mg, 264  $\mu\text{mol}$ ) at  $0\text{ }^{\circ}\text{C}$ . After being stirred for 80 min at  $0\text{ }^{\circ}\text{C}$ , the solution was refluxed for further 23 h. The reaction mixture was cooled to rt and quenched by the addition of sat.  $\text{NaHCO}_3$  aq. and diluted with  $\text{CH}_2\text{Cl}_2$ . The aqueous layer was

extracted with CH<sub>2</sub>Cl<sub>2</sub>. The combined organic solution was washed with brine, dried over Na<sub>2</sub>SO<sub>4</sub>, filtered, and concentrated to give a residue. The residue was purified by flash column chromatography (hexane/EtOAc = 99/1 to 9/1) to give **6** (84.3 mg, 209 μmol, 83%) as a yellow oil.

$[\alpha]_D^{23}$  -35.4 (*c* 0.40, CHCl<sub>3</sub>); IR (neat)  $\nu_{\max}$  = 2954, 2932, 2859, 1764, 1496, 1469, 1431, 1269, 1216, 1049, 936, 904, 842, 810, 783 cm<sup>-1</sup>; <sup>1</sup>H NMR (600 MHz, CDCl<sub>3</sub>)  $\delta$  7.13 (brd *J* = 1.2 Hz, 1H), 6.77 (d, *J* = 8.4 Hz, 1H), 6.74 (dd, *J* = 8.4, 3.0 Hz, 1H), 6.65 (d, *J* = 3.0 Hz, 1H), 6.19 (brd, *J* = 1.2 Hz, 1H), 5.10-5.07 (m, 1H), 3.73 (s, 3H), 2.40-2.32 (m, 2H), 2.31-2.22 (m, 2H), 1.67 (d, *J* = 1.2 Hz, 3H), 1.58 (s, 3H), 1.01 (s, 9H), 0.28 (s, 3H), 0.24 (s, 3H); <sup>13</sup>C NMR (150 MHz, CDCl<sub>3</sub>)  $\delta$  174.4, 154.3, 148.0, 146.6, 133.2, 132.9, 126.6, 122.8, 119.2, 114.9, 111.3, 77.8, 55.8, 25.9 (4C), 25.7, 25.4, 18.3, 17.9, -3.9, -4.3; HRMS (ESI) *m/z* calcd. for C<sub>23</sub>H<sub>35</sub>O<sub>4</sub>Si ([M+H]<sup>+</sup>) 403.2299, found 403.2316.

#### *ent*-fornicin A (*ent*-4)

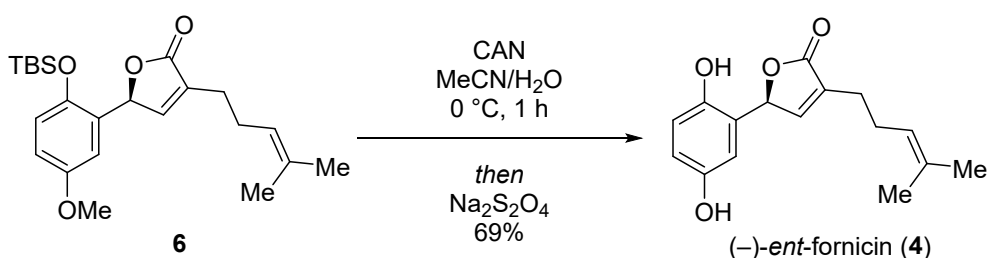

To a solution of **6** (61.5 mg, 153 μmol) in a mixture of MeCN/H<sub>2</sub>O (2:1 v/v, 1.5 mL) was added CAN (180.1 mg, 329 μmol) at 0 °C. The mixture was stirred for 1 h at 0 °C. The reaction mixture was quenched by the addition of H<sub>2</sub>O and sat. Na<sub>2</sub>S<sub>2</sub>O<sub>4</sub> aq., and then diluted with EtOAc. The aqueous layer was extracted with EtOAc. The combined organic solution was washed with brine, dried over Na<sub>2</sub>SO<sub>4</sub>, filtered, and concentrated to give a residue. The residue was purified by flash column chromatography (hexane/EtOAc = 9/1 to 1/1) to give *ent*-4 (28.8 mg, 105 μmol, 69%) as a yellow oil.

$[\alpha]_D^{24}$  -36.2 (*c* 0.71, MeOH); IR (neat)  $\nu_{\max}$  = 3364, 2968, 2920, 2855, 1733, 1507, 1455, 1357, 1302, 1200, 815 cm<sup>-1</sup>; <sup>1</sup>H NMR (600 MHz, acetone-*d*<sub>6</sub>)  $\delta$  8.26 (s, 1H), 7.80 (s, 1H), 7.35 (d, *J* = 1.8 Hz, 1H), 6.75 (d, *J* = 9.0 Hz, 1H), 6.65 (dd, *J* = 9.0, 2.4 Hz, 1H), 6.53 (d, *J* = 2.4 Hz, 1H), 5.13 (brt, *J* = 7.2 Hz, 1H), 2.33-2.30 (m, 2H), 2.29-2.25 (brm, 2H), 1.64 (d, *J* = 1.2 Hz, 3H), 1.58 (s, 3H); <sup>13</sup>C NMR (150 MHz, acetone-*d*<sub>6</sub>)  $\delta$  174.4, 151.5, 149.4, 148.2, 133.2, 132.8, 124.0, 123.8, 117.1, 116.8, 113.2, 78.2, 26.7, 26.0, 25.7, 17.7; HRMS (ESI) *m/z* calcd. for C<sub>16</sub>H<sub>18</sub>O<sub>4</sub>Na ([M+Na]<sup>+</sup>) 297.1097, found 297.1106.

#### (*E*)-*tert*-butyl((5-iodo-2-methylpent-2-en-1-yl)oxy)dimethylsilane (**9**)

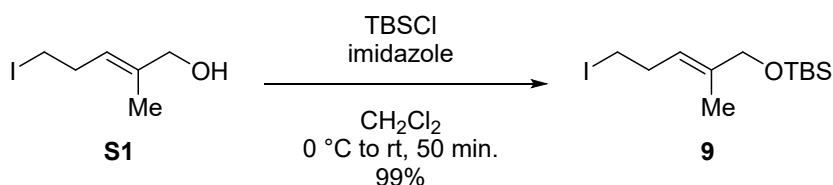

To a solution of **S1**<sup>S3</sup> (1.01 g, 4.47 mmol) and imidazole (662.6 mg, 9.37 mmol) in CH<sub>2</sub>Cl<sub>2</sub> (8.9 mL) was added TBSCl (734.8 mg, 4.88 mmol) at 0 °C. The mixture was stirred for 50 min at rt. The reaction mixture was quenched by the addition of sat. NH<sub>4</sub>Cl aq. and diluted with EtOAc. The aqueous layer was extracted with EtOAc. The

combined organic solution was washed with brine, dried over Na<sub>2</sub>SO<sub>4</sub>, filtered, and concentrated to give a residue. The residue was purified by flash column chromatography (hexane/EtOAc = 97/3) to give **9** (1.50 g, 4.41 mmol, 99%) as a colorless oil.

IR (neat)  $\nu_{\max}$  = 2953, 2930, 2892, 2856, 1466, 1254, 1115, 1071, 839.8, 777 cm<sup>-1</sup>; <sup>1</sup>H NMR (600 MHz, CDCl<sub>3</sub>)  $\delta$  5.38 (tdd,  $J$  = 7.2, 1.2, 1.2 Hz, 1H), 4.00 (br s, 2H), 3.13 (t,  $J$  = 7.2 Hz, 2H), 2.63 (q,  $J$  = 7.2 Hz, 2H), 1.60 (br s, 3H), 0.91 (s, 9H), 0.07 (s, 6H); <sup>13</sup>C NMR (150 MHz, CDCl<sub>3</sub>)  $\delta$  137.1, 122.4, 68.0, 31.9, 25.9 (3C), 18.4, 13.6, 5.4, -5.3 (2C); HRMS (ESI)  $m/z$  calcd. for C<sub>12</sub>H<sub>25</sub>IOSiNa ([M+Na]<sup>+</sup>) 363.0612, found 363.0607.

**(5S)-3-((E)-5-((tert-butyldimethylsilyl)oxy)-4-methylpent-3-en-1-yl)-5-(2-((tert-butyldimethylsilyl)oxy)-5-methoxyphenyl)-3-(phenylthio)dihydrofuran-2(3H)-one (7)**

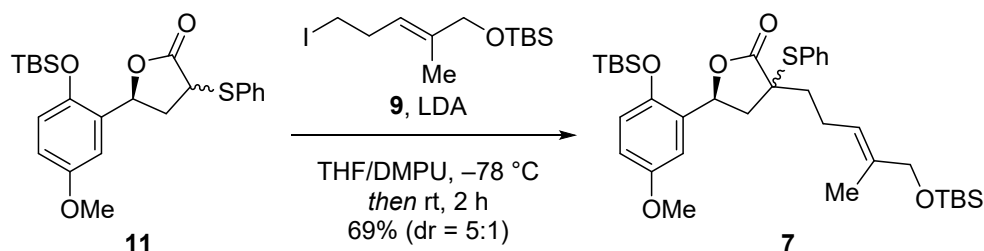

To a solution of **11** (90.0 mg, 209  $\mu$ mol) in THF (2.0 mL) was added LDA (2.0 M in THF, prepared from *i*Pr<sub>2</sub>NH and *n*BuLi, 135  $\mu$ L, 270  $\mu$ mol) dropwise via syringe at  $-78$  °C. The mixture was stirred for 30 min at 0 °C, and then cooled to  $-78$  °C. To the reaction mixture was added a solution of **9** (145.2 mg, 427  $\mu$ mol) in DMPU (1.6 mL) dropwise via syringe at  $-78$  °C. The solution was stirred for 2 h at rt. The reaction mixture was quenched by the addition of sat. NH<sub>4</sub>Cl aq. and diluted with EtOAc. The aqueous layer was extracted with EtOAc. The combined organic solution was washed with brine, dried over Na<sub>2</sub>SO<sub>4</sub>, filtered, and concentrated to give a residue. The residue was purified by flash column chromatography (hexane/EtOAc = 99/1 to 9/1) to give **7** (93.3 mg, 145  $\mu$ mol, 69%, dr = 5:1) as a yellow oil.

$[\alpha]_{\text{D}}^{26}$   $-18.7$  (*c* 0.20, CHCl<sub>3</sub>); IR (neat)  $\nu_{\max}$  = 2953, 2933, 2895, 2857, 1773, 1497, 1469, 1258, 1177, 1112, 1044, 917, 839, 779 cm<sup>-1</sup>; <sup>1</sup>H NMR (600 MHz, CDCl<sub>3</sub>, diastereomer mixture, dr = 5:1)  $\delta$  7.59-7.52 (m, 2.4H), 7.44-7.31 (m, 3.6H), 6.91 (d,  $J$  = 2.4 Hz, 1H), 6.75 (d,  $J$  = 9.0 Hz, 1H), 6.73 (dd,  $J$  = 9.0, 2.4 Hz, 1H), 6.671 (br s, 0.2H), 6.669 (br s, 0.2H), 6.43 (s, 0.2H), 5.95 (dd,  $J$  = 10.2, 5.4 Hz, 1H), 5.63 (t,  $J$  = 7.8 Hz, 0.2H), 5.36 (td,  $J$  = 7.8, 1.2 Hz, 0.2H), 5.31 (td,  $J$  = 7.8, 1.2 Hz, 1H), 4.01 (br s, 0.4H), 3.96 (br s, 2H), 3.76 (s, 3H), 3.65 (s, 0.6H), 3.79 (dd,  $J$  = 13.8, 7.8 Hz, 0.2H), 2.70 (dd,  $J$  = 14.4, 5.4 Hz, 1H), 2.45-2.29 (m, 1.4H), 2.26-2.18 (m, 1.2H), 2.06-2.00 (m, 1H), 1.96-1.83 (m, 1.2H), 1.72-1.66 (m, 1H), 1.64-1.56 (m, 0.2H), 1.61 (s, 0.6H), 1.57 (s, 3H), 1.05 (s, 9H), 0.98 (s, 1.8H), 0.91 (1.8H), 0.88 (s, 9H), 0.27 (s, 3H), 0.25 (s, 3H), 0.23 (s, 0.6H), 0.19 (s, 0.6H), 0.06 (s, 1.2H), 0.02 (s, 6H); <sup>13</sup>C NMR (150 MHz, CDCl<sub>3</sub>, diastereomer mixture, dr = 5:1)  $\delta$  176.4, 174.8, 154.2, 153.9, 146.0, 145.6, 137.1 (2C), 136.9 (2C), 136.0, 135.5, 130.3, 130.1, 130.0, 129.7, 129.1, 129.0 (2C), 128.9 (3C), 122.4, 121.8, 119.1, 118.7, 114.8, 114.3, 110.7, 110.3, 74.1, 73.1, 68.2, 68.1, 56.3, 55.8, 55.7, 55.5, 42.5, 40.8, 35.9, 34.0, 25.9 (6C), 25.7 (6C), 23.0, 22.6, 18.39, 18.36, 18.2, 18.1, 13.5 (2C), -3.9, -4.0, -4.3, -4.4, -5.28 (2C), -5.32 (2C); HRMS (ESI)  $m/z$  calcd. for C<sub>35</sub>H<sub>54</sub>O<sub>5</sub>SSi<sub>2</sub>Na ([M+Na]<sup>+</sup>) 665.3123, found 665.3100.

**(S,E)-3-(5-((tert-butyldimethylsilyl)oxy)-4-methylpent-3-en-1-yl)-5-(2-((tert-butyldimethylsilyl)oxy)-5-methoxyphenyl)furan-2(5H)-one (5)**



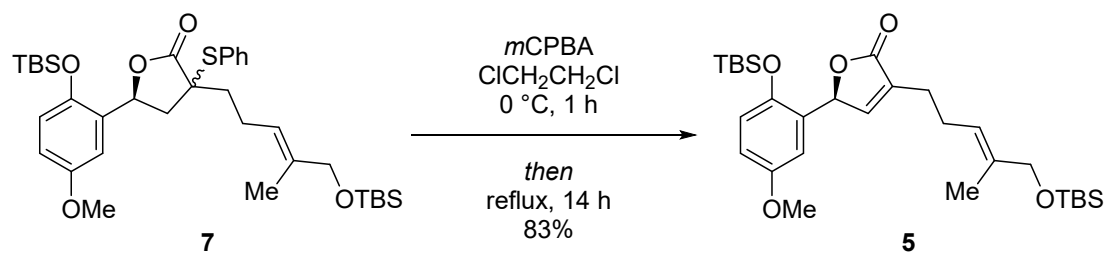

To a solution of **7** (87.1 mg, 135  $\mu\text{mol}$ ) in dichloroethane (1.4 mL) was added *m*CPBA (65%, 38.5 mg, 145  $\mu\text{mol}$ ) at 0  $^\circ\text{C}$ . The mixture was stirred for 1 h at 0  $^\circ\text{C}$ , and then refluxed for further 14 h. The reaction mixture was cooled to rt and quenched by the addition of sat.  $\text{NaHCO}_3$  aq. and diluted with  $\text{CH}_2\text{Cl}_2$ . The aqueous layer was extracted with  $\text{CH}_2\text{Cl}_2$ . The combined organic solution was washed with brine, dried over  $\text{Na}_2\text{SO}_4$ , filtered, and concentrated to give a residue. The residue was purified by flash column chromatography (hexane/EtOAc = 99/1 to 9/1) to give **5** (59.9 mg, 112  $\mu\text{mol}$ , 83%) as a yellow oil.

$[\alpha]_{\text{D}}^{26} -18.7$  (*c* 0.25,  $\text{CHCl}_3$ ); IR (neat)  $\nu_{\text{max}} = 2953, 2933, 2896, 2858, 1765, 1496, 1468, 1259, 1109, 1056, 904, 840, 780\text{ cm}^{-1}$ ;  $^1\text{H NMR}$  (600 MHz,  $\text{CDCl}_3$ )  $\delta$  7.14 (d,  $J = 1.8\text{ Hz}$ , 1H), 6.77 (d,  $J = 9.0\text{ Hz}$ , 1H), 6.74 (dd,  $J = 9.0, 3.0\text{ Hz}$ , 1H), 6.64 (d,  $J = 3.0\text{ Hz}$ , 1H), 6.19 (d,  $J = 1.8\text{ Hz}$ , 1H), 5.38 (tdd,  $J = 6.0, 1.2, 1.2\text{ Hz}$ , 1H), 3.97 (br s, 2H), 3.72 (s, 3H), 2.39 (td,  $J = 7.8\text{ Hz}, 1.2\text{ Hz}$ , 2H), 2.32 (dd,  $J = 14.4, 7.8\text{ Hz}$ , 2H), 1.58 (br s, 3H), 1.01 (s, 9H), 0.89 (s, 9H), 0.28 (s, 3H), 0.24 (s, 3H), 0.031 (s, 3H), 0.038 (s, 3H);  $^{13}\text{C NMR}$  (150 MHz,  $\text{CDCl}_3$ )  $\delta$  174.2, 154.1, 147.9, 146.5, 135.9, 132.8, 126.4, 122.3, 119.2, 114.8, 111.2, 77.7, 68.2, 55.7, 25.9 (3C), 25.8 (3C), 25.3, 25.2, 18.4, 18.2, 13.5, -4.0, -4.4, -5.3 (2C); HRMS (ESI)  $m/z$  calcd. for  $\text{C}_{29}\text{H}_{48}\text{O}_5\text{Si}_2\text{Na}$  ( $[\text{M}+\text{Na}]^+$ ) 555.2932, found 555.2929.

**(*S,E*)-3-(5-hydroxy-4-methylpent-3-en-1-yl)-5-(2-hydroxy-5-methoxyphenyl)furan-2(*5H*)-one (**15**)**

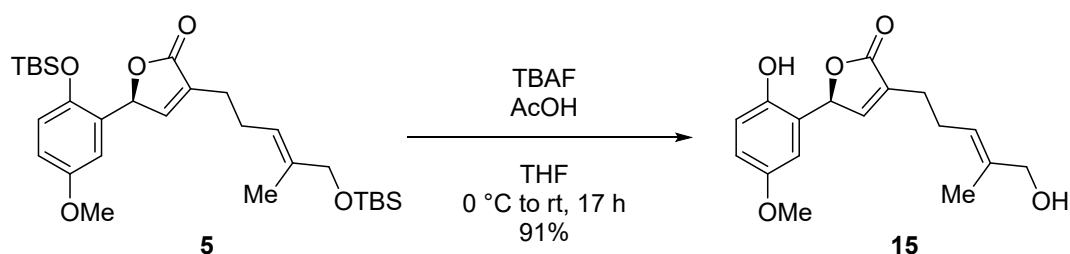

To a solution of **5** (100.2 mg, 188  $\mu\text{mol}$ ) in THF (625  $\mu\text{L}$ ) was added AcOH (33.0  $\mu\text{L}$ , 577  $\mu\text{mol}$ ) and TBAF (1.0 M in THF, 565  $\mu\text{L}$ , 565  $\mu\text{mol}$ ) at 0  $^\circ\text{C}$ . The mixture was stirred for 17 h at rt. The reaction mixture was quenched by the addition of sat.  $\text{NH}_4\text{Cl}$  aq. and diluted with EtOAc. The aqueous layer was extracted with EtOAc. The combined organic solution was washed with brine, dried over  $\text{Na}_2\text{SO}_4$ , filtered, and concentrated to give a residue. The residue was purified by flash column chromatography (hexane/EtOAc = 7/3 to 1/4) to give **15** (52.1 mg, 171  $\mu\text{mol}$ , 91%) as a yellow oil.

$[\alpha]_{\text{D}}^{23} -12.1$  (*c* 0.30,  $\text{CHCl}_3$ ); IR (neat)  $\nu_{\text{max}} = 3400, 2935, 2865, 1737, 1508, 1435, 1278, 1208, 1043, 815\text{ cm}^{-1}$ ;  $^1\text{H NMR}$  (600 MHz,  $\text{CD}_3\text{OD}$ )  $\delta$  7.36 (d,  $J = 2.4\text{ Hz}$ , 1H), 6.76 (d, 9.0 Hz, 1H), 6.74 (dd,  $J = 9.0, 3.0\text{ Hz}$ , 1H), 6.54 (d,  $J = 3.0\text{ Hz}$ , 1H), 6.23 (d,  $J = 2.4\text{ Hz}$ , 1H), 5.39 (br td,  $J = 7.2, 1.2\text{ Hz}$ , 1H), 3.88 (br s, 2H), 3.68 (s, 3H), 2.38-2.36 (m, 2H), 2.35-2.29 (m, 2H), 1.60 (s, 3H);  $^{13}\text{C NMR}$  (150 MHz,  $\text{CDCl}_3$ )  $\delta$  174.8, 153.5, 148.9, 147.5, 136.0, 132.3, 124.3, 122.6, 116.7, 114.8, 112.0, 78.6, 68.5, 55.8, 25.3, 24.9, 13.7; HRMS (ESI)  $m/z$  calcd. for  $\text{C}_{17}\text{H}_{20}\text{O}_5\text{Na}$  ( $[\text{M}+\text{Na}]^+$ ) 327.1203, found 327.1196.

### (-)-applanatumol U (**3**)

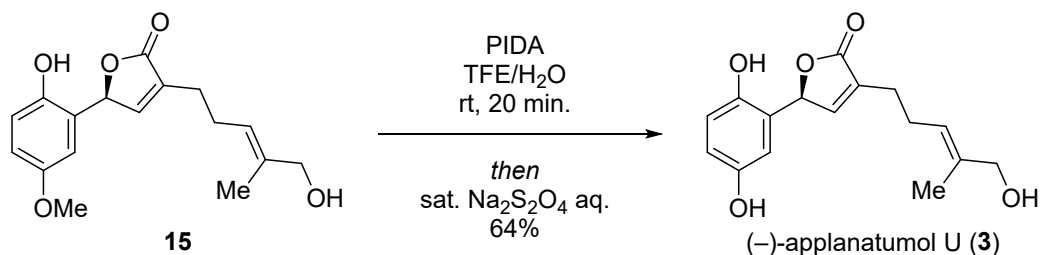

To a solution of **15** (45.0 mg, 148  $\mu$ mol) in a mixture of 2,2,2-trifluoroethanol (TFE)/H<sub>2</sub>O (5:3 v/v, 1.5 mL) was added iodobenzene diacetate (PIDA, 71.4 mg, 222  $\mu$ mol) at rt. The mixture was stirred for 20 min at rt. The reaction mixture was quenched by the addition of sat. Na<sub>2</sub>S<sub>2</sub>O<sub>4</sub> aq. and H<sub>2</sub>O, and then diluted with EtOAc. The aqueous layer was extracted with EtOAc. The combined organic solution was washed with brine, dried over Na<sub>2</sub>SO<sub>4</sub>, filtered, and concentrated to give a residue. The residue was purified by flash column chromatography (hexane/EtOAc = 7/3 to 1/4) to give (-)-**3** (27.3 mg, 94.0  $\mu$ mol, 64%) as a yellow oil.

$[\alpha]_D^{23}$  -18.5 (*c* 0.23, MeOH); IR (neat)  $\nu_{\max}$  = 3314, 2925, 2857, 1733, 1508, 1456, 1358, 1303, 1203, 1052, 815  $\text{cm}^{-1}$ ; <sup>1</sup>H NMR (600 MHz, CD<sub>3</sub>OD)  $\delta$  7.35 (d, *J* = 1.2 Hz, 1H), 6.67 (d, *J* = 9.0 Hz, 1H), 6.60 (dd, *J* = 9.0, 3.0 Hz, 1H), 6.44 (d, *J* = 3.0 Hz, 1H), 6.24 (d, *J* = 1.2 Hz, 1H), 5.40 (br t, *J* = 7.2 Hz, 1H), 3.90 (s, 2H), 2.40-2.30 (m, 4H), 1.61 (s, 3H); <sup>13</sup>C NMR (150 MHz, CD<sub>3</sub>OD)  $\delta$  176.7, 151.5, 151.2, 149.0, 137.6, 133.1, 124.8, 123.4, 117.3, 117.2, 113.4, 79.7, 68.6, 26.5, 26.0, 13.8; HRMS (ESI) *m/z* calcd. for C<sub>16</sub>H<sub>18</sub>O<sub>5</sub>Na ([M+Na]<sup>+</sup>) 313.1046, found 313.1054.

### (*S,E*)-5-(5-(2-((*tert*-butyldimethylsilyl)oxy)-5-methoxyphenyl)-2-oxo-2,5-dihydrofuran-3-yl)-2-methylpent-2-enal (**16**)

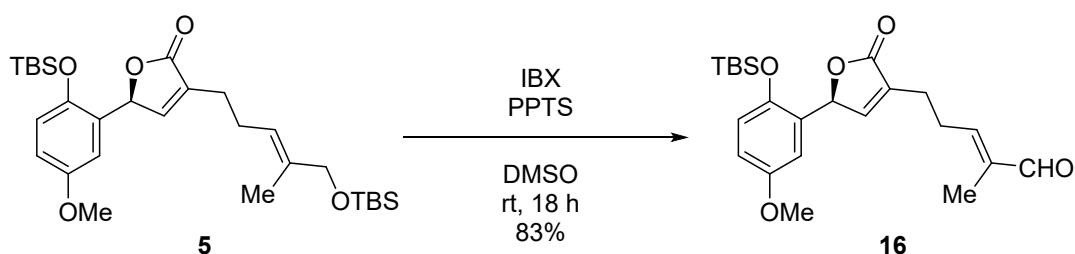

To a solution of **5** (95.1 mg, 178  $\mu$ mol) in DMSO (1.8 mL) was added PPTS (45.2 mg, 180  $\mu$ mol) and IBX (74.8 mg, 267  $\mu$ mol) at rt. The mixture was stirred for 18 h at rt. The reaction mixture was quenched by the addition of H<sub>2</sub>O and diluted with EtOAc. The aqueous layer was extracted with EtOAc. The combined organic solution was washed with brine, dried over Na<sub>2</sub>SO<sub>4</sub>, filtered, and concentrated to give a residue. The residue was purified by flash column chromatography (hexane/EtOAc = 19/1 to 4/1) to give **16** (61.5 mg, 148  $\mu$ mol, 83%) as a yellow oil.

$[\alpha]_D^{23}$  -26.8 (*c* 0.30, CHCl<sub>3</sub>); IR (neat)  $\nu_{\max}$  = 2953, 2933, 2858, 1762, 1686, 1497, 1270, 1216, 1049, 905, 842, 782  $\text{cm}^{-1}$ ; <sup>1</sup>H NMR (600 MHz, CDCl<sub>3</sub>)  $\delta$  9.39 (s, 1H), 7.20 (d, *J* = 1.2 Hz, 1H), 6.78 (d, *J* = 9.0 Hz, 1H), 6.75 (dd, *J* = 9.0, 3.0 Hz, 1H), 6.64 (d, *J* = 3.0 Hz, 1H), 6.44 (td, *J* = 7.2, 1.8 Hz, 1H), 6.21 (d, *J* = 1.2 Hz, 1H), 3.72 (s, 3H), 2.70-2.63 (m, 2H), 2.60-2.51 (m, 2H), 1.74 (d, *J* = 1.8 Hz, 1H), 1.00 (s, 9H), 0.28 (s, 3H), 0.24 (s, 3H); <sup>13</sup>C NMR (150 MHz, CDCl<sub>3</sub>)  $\delta$  194.8, 173.7, 154.2, 151.7, 148.6, 146.5, 140.4, 131.7, 126.0, 119.2, 114.9, 111.1, 77.9, 55.8, 26.7, 25.8 (3C), 24.1, 18.2, 9.3, -3.9, -4.4; HRMS (ESI) *m/z* calcd. for C<sub>23</sub>H<sub>32</sub>O<sub>5</sub>SiNa ([M+Na]<sup>+</sup>) 439.1911, found 439.1921.

**(-)-chizhine E (2)**

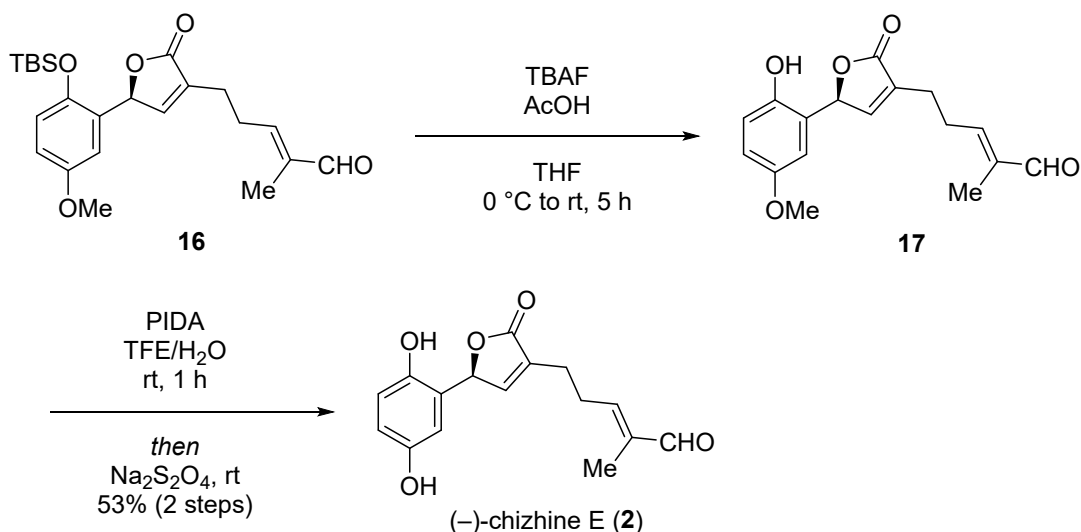

To a solution of **16** (24.8 mg, 59.5  $\mu\text{mol}$ ) in THF (600  $\mu\text{L}$ ) was added AcOH (5.5  $\mu\text{L}$ , 96  $\mu\text{mol}$ ) and TBAF (1.0 M in THF, 90  $\mu\text{L}$ , 90  $\mu\text{mol}$ ) at 0 °C. The mixture was stirred for 5 h at rt. The reaction mixture was quenched by the addition of sat. NH<sub>4</sub>Cl aq. and diluted with EtOAc. The aqueous layer was extracted with EtOAc. The combined organic solution was washed with brine, dried over Na<sub>2</sub>SO<sub>4</sub>, filtered, and concentrated to give a crude **17**, which was used next reaction without further purification.

To a solution of crude **17** (prepared above, 59.5  $\mu\text{mol}$ ) in a mixture of TFE/H<sub>2</sub>O (5:3 v/v, 600  $\mu\text{L}$ ) was added PIDA (38.4 mg, 119  $\mu\text{mol}$ ) at rt. The mixture was stirred for 1 h at rt. The reaction mixture was quenched by the addition of sat. Na<sub>2</sub>S<sub>2</sub>O<sub>4</sub> aq. and H<sub>2</sub>O, and then diluted with EtOAc. The aqueous layer was extracted with EtOAc. The combined organic solution was washed with brine, dried over Na<sub>2</sub>SO<sub>4</sub>, filtered, and concentrated to give a residue. The residue was purified by flash column chromatography (hexane/EtOAc = 7/3 to 1/4) to give (-)-**2** (9.2 mg, 31.7  $\mu\text{mol}$ , 53% over two steps from **16**) as a yellow oil.

$[\alpha]_{\text{D}}^{23}$  -25.0 (*c* 0.04, MeOH); IR (neat)  $\nu_{\text{max}}$  = 3363, 2923, 2851, 1735, 1670, 1508, 1455, 1359, 1303, 1202, 1052, 816  $\text{cm}^{-1}$ ; <sup>1</sup>H NMR (600 MHz, CD<sub>3</sub>OD)  $\delta$  9.35 (s, 1H), 7.44 (d, *J* = 1.2 Hz, 1H), 6.66 (d, *J* = 7.8 Hz, 1H), 6.61 (dd, *J* = 7.8, 1.8 Hz, 1H), 6.61-6.59 (m, 1H), 6.45 (d, *J* = 1.8 Hz, 1H), 6.23 (d, *J* = 1.2 Hz, 1H), 2.68 (dd, *J* = 14.4, 7.8 Hz, 2H), 2.54 (td, *J* = 7.8, 1.2 Hz, 2H), 1.71 (d, *J* = 1.2 Hz, 3H); <sup>13</sup>C NMR (150 MHz, CD<sub>3</sub>OD)  $\delta$  196.9, 176.4, 154.5, 151.7, 151.5, 149.0, 141.4, 132.3, 123.2, 117.3, 117.2, 113.3, 80.1, 27.9, 24.8, 9.2; HRMS (ESI) *m/z* calcd. for C<sub>16</sub>H<sub>16</sub>O<sub>5</sub>Na ([M+Na]<sup>+</sup>) 311.0890, found 311.0898.

**(*S,E*)-5-(5-(2-((*tert*-butyldimethylsilyl)oxy)-5-methoxyphenyl)-2-oxo-2,5-dihydrofuran-3-yl)-2-methylpent-2-enoic acid (18)**

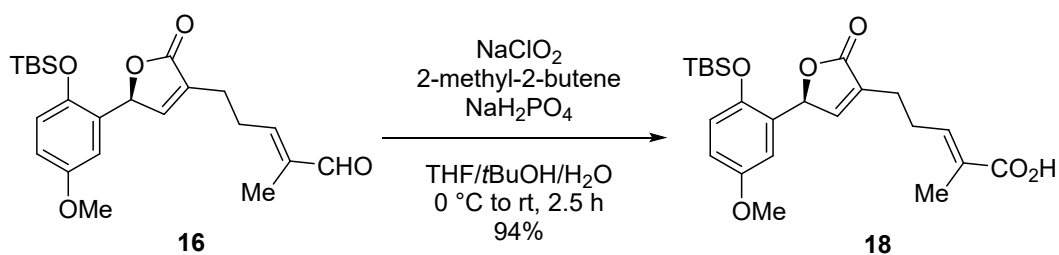

To a solution of **16** (51.1 mg, 123  $\mu\text{mol}$ ) and NaH<sub>2</sub>PO<sub>4</sub> (304.2 mg, 2.54 mmol) in THF (570  $\mu\text{L}$ ) and *t*BuOH (570

$\mu\text{L}$ ) was added 2-methyl-2-butene (720  $\mu\text{L}$ , 6.78 mmol) and a solution of  $\text{NaClO}_2$  (192.1 mg, 1.70 mmol) in  $\text{H}_2\text{O}$  (570  $\mu\text{L}$ ) at  $0^\circ\text{C}$ . The mixture was stirred for 2.5 h at rt. The reaction mixture was quenched by the addition of  $\text{H}_2\text{O}$  and diluted with EtOAc. The aqueous layer was extracted with EtOAc. The combined organic solution was washed with brine, dried over  $\text{Na}_2\text{SO}_4$ , filtered, and concentrated to give a residue. The residue was purified by flash column chromatography ( $\text{CHCl}_3/\text{MeOH} = 99/1$  to  $97/3$ ) to give **18** (50.0 mg, 115  $\mu\text{mol}$ , 94%) as a yellow oil.

$[\alpha]_{\text{D}}^{23} -34.7$  ( $c$  0.20,  $\text{CHCl}_3$ ); IR (neat)  $\nu_{\text{max}} = 2953, 2934, 2859, 1762, 1688, 1496, 1273, 1216, 1048, 904, 842, 783\text{ cm}^{-1}$ ;  $^1\text{H NMR}$  (600 MHz,  $\text{CDCl}_3$ )  $\delta$  7.18 (d,  $J = 1.8\text{ Hz}$ , 1H), 6.84 (br t,  $J = 6.6\text{ Hz}$ , 1H), 6.77 (d,  $J = 9.0\text{ Hz}$ , 1H), 6.75 (dd,  $J = 9.0, 3.0\text{ Hz}$ , 1H), 6.64 (d,  $J = 3.0\text{ Hz}$ , 1H), 6.21 (d,  $J = 1.8\text{ Hz}$ , 1H), 3.72 (s, 3H), 2.54-2.48 (m, 4H), 2.84 (s, 3H), 1.00 (s, 9H), 0.28 (s, 3H), 0.24 (s, 3H);  $^{13}\text{C NMR}$  (150 MHz,  $\text{CDCl}_3$ )  $\delta$  173.8, 172.9, 154.2, 148.5, 146.5, 142.5, 131.9, 128.5, 126.0, 119.2, 115.0, 111.0, 77.9, 55.7, 26.5, 25.7 (3C), 24.2, 18.2, 12.1, -4.0, -4.4; HRMS (ESI)  $m/z$  calcd. for  $\text{C}_{23}\text{H}_{32}\text{O}_6\text{SiNa}$  ( $[\text{M}+\text{Na}]^+$ ) 455.1860, found 455.1840.

### (-)-oregonensin A (**1**)

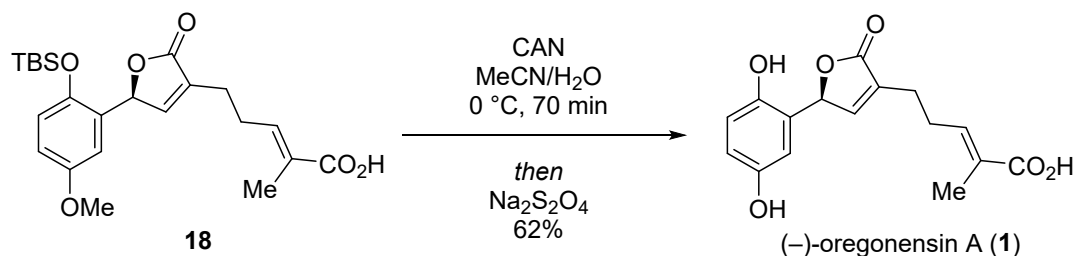

To a solution of **18** (33.0 mg, 76.3  $\mu\text{mol}$ ) in a mixture of  $\text{MeCN}/\text{H}_2\text{O}$  (760  $\mu\text{L}$ ) was added  $\text{CAN}$  (62.8 mg, 115  $\mu\text{mol}$ ) at  $0^\circ\text{C}$ . The mixture was stirred for 70 min at  $0^\circ\text{C}$ . The reaction mixture was quenched by the addition of sat.  $\text{Na}_2\text{S}_2\text{O}_4$  aq. and  $\text{H}_2\text{O}$ , and diluted with EtOAc. The aqueous layer was extracted with EtOAc. The combined organic solution was washed with brine, dried over  $\text{Na}_2\text{SO}_4$ , filtered, and concentrated to give a residue. The residue was purified by flash column chromatography ( $\text{CHCl}_3/\text{MeOH} = 99/1$  to  $9/1$ ) to give **1** (14.3 mg, 47.0  $\mu\text{mol}$ , 62%) as a yellow oil.

$[\alpha]_{\text{D}}^{23} -11.2$  ( $c$  0.18,  $\text{CHCl}_3$ ); IR (neat)  $\nu_{\text{max}} = 3345, 2959, 2928, 2857, 1735, 1646, 1507, 1455, 1263, 1201, 1095, 1052, 811\text{ cm}^{-1}$ ;  $^1\text{H NMR}$  (600 MHz,  $\text{CD}_3\text{OD}$ )  $\delta$  7.40 (d,  $J = 1.2\text{ Hz}$ , 1H), 6.76 (td,  $J = 7.2, 1.2\text{ Hz}$ , 1H), 6.67 (d,  $J = 9.0\text{ Hz}$ , 1H), 6.60 (dd,  $J = 9.0, 3.0\text{ Hz}$ , 1H), 6.46 (d,  $J = 3.0\text{ Hz}$ , 1H), 6.24 (d,  $J = 1.2\text{ Hz}$ , 1H), 2.51-2.45 (m, 4H), 1.80 (s, 3H);  $^{13}\text{C NMR}$  (150 MHz,  $\text{CD}_3\text{OD}$ )  $\delta$  176.4, 171.5, 151.5, 151.4, 149.0, 141.8, 132.6, 130.3, 123.3, 117.3, 117.2, 113.3, 80.0, 27.6, 25.1, 12.5; HRMS (ESI)  $m/z$  calcd. for  $\text{C}_{16}\text{H}_{16}\text{O}_6\text{Na}$  ( $[\text{M}+\text{Na}]^+$ ) 327.0839, found 327.0844.

### 3. Additional Results

Our preliminary experiments are shown in Table S1 and Scheme S1. Our efforts to deprotect two methyl groups were unsuccessful due to the high reactivity of benzylic and allylic positions.

**Table S1. Attempts for removal of two methyl group of S2.**

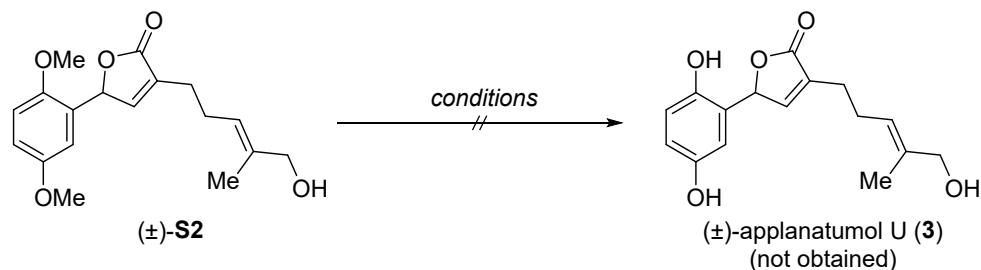

| entry          | reagent          | solvent               | temp (°C)  | results                                              |
|----------------|------------------|-----------------------|------------|------------------------------------------------------|
| 1 <sup>a</sup> | CAN              | MeCN/H <sub>2</sub> O | 0          | complex mixture                                      |
| 2 <sup>a</sup> | CAN              | MeOH/DCM              | -78 to -30 | <b>S3</b> was observed by <sup>1</sup> H NMR and MS. |
| 3 <sup>a</sup> | PIDA             | TFE/H <sub>2</sub> O  | rt         | no reaction                                          |
| 4 <sup>a</sup> | PIFA             | TFE/H <sub>2</sub> O  | rt to 50   | complex mixture                                      |
| 5              | BBr <sub>3</sub> | DCM                   | -78 to rt  | <b>S4</b> was observed by MS.                        |

<sup>a</sup>Reaction mixture was treated with Na<sub>2</sub>S<sub>2</sub>O<sub>4</sub> aq. as work up.

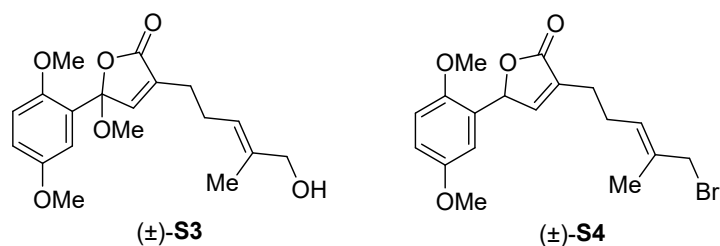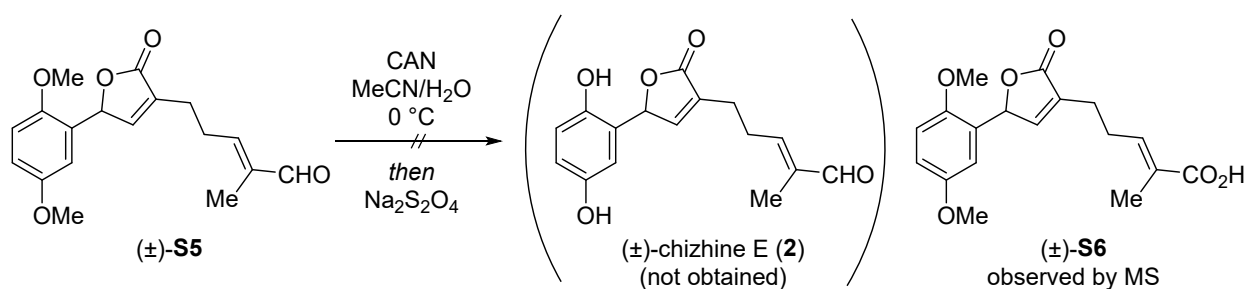

**Scheme S1. Attempt for demethylation of dimethyl protected substrate S5.**

#### 4. <sup>1</sup>H and <sup>13</sup>C NMR spectroscopic data

**Table S2. NMR spectroscopic data (CD<sub>3</sub>OD) for natural oregonensin A (1) and synthetic (–)-oregonensin A (1).**

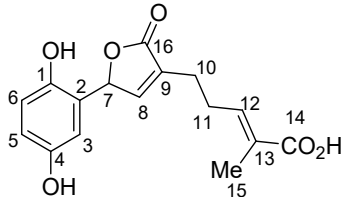

natural  
(±)-oregonensin A (1)



synthetic  
(–)-oregonensin A (1)

| No. | Natural (±)-1 |                                   | Synthetic (–)-1 |                                   |
|-----|---------------|-----------------------------------|-----------------|-----------------------------------|
|     | $\delta_C$    | $\delta_H$ (mult, <i>J</i> in Hz) | $\delta_C$      | $\delta_H$ (mult, <i>J</i> in Hz) |
| 1   | 149.1         |                                   | 149.0           |                                   |
| 2   | 123.4         |                                   | 123.3           |                                   |
| 3   | 113.4         | 6.46 (d, 3.4)                     | 113.3           | 6.46 (d, 3.0)                     |
| 4   | 151.5         |                                   | 151.4           |                                   |
| 5   | 117.4         | 6.61 (dd, 8.7, 3.4)               | 117.3           | 6.60 (dd, 9.0, 3.0)               |
| 6   | 117.3         | 6.67 (d, 8.7)                     | 117.2           | 6.67 (d, 9.0)                     |
| 7   | 80.1          | 6.24 (br s)                       | 80.0            | 6.24 (d, 1.2)                     |
| 8   | 151.6         | 7.41 (d, 1.4)                     | 151.5           | 7.40 (d, 1.2)                     |
| 9   | 132.8         |                                   | 132.6           |                                   |
| 10  | 25.2          | 2.46 (m)                          | 25.1            | 2.51-2.45 (m)                     |
| 11  | 27.7          | 2.47 (m)                          | 27.6            | 2.51-2.45 (m)                     |
| 12  | 141.8         | 6.76 (t, 6.4)                     | 141.8           | 6.76 (td, 7.2, 1.2)               |
| 13  | 130.5         |                                   | 130.3           |                                   |
| 14  | 171.7         |                                   | 171.5           |                                   |
| 15  | 12.7          | 1.80 (s)                          | 12.5            | 1.80 (s)                          |
| 16  | 176.5         |                                   | 176.4           |                                   |

**Table S3. NMR spectroscopic data (CD<sub>3</sub>OD) for natural chizhine E (2) and synthetic (–)-chizhine E (2).**

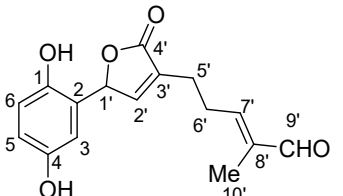

natural  
(±)-chizhine E (2)



synthetic  
(–)-chizhine E (2)

| No. | Natural (±)-2 |                                   | Synthetic (–)-2 |                                   |
|-----|---------------|-----------------------------------|-----------------|-----------------------------------|
|     | $\delta_C$    | $\delta_H$ (mult, <i>J</i> in Hz) | $\delta_C$      | $\delta_H$ (mult, <i>J</i> in Hz) |
| 1   | 148.9         |                                   | 149.0           |                                   |
| 2   | 123.2         |                                   | 123.2           |                                   |

|     |       |                     |       |                      |
|-----|-------|---------------------|-------|----------------------|
| 3   | 113.5 | 6.46 (d, 2.9)       | 113.3 | 6.45 (d, 1.8)        |
| 4   | 151.5 |                     | 151.5 |                      |
| 5   | 117.2 | 6.61 (dd, 8.6, 2.9) | 117.2 | 6.61 (dd, 7.8, 1.8)  |
| 6   | 117.3 | 6.68 (d, 8.6)       | 117.3 | 6.66 (d, 7.8)        |
| 1'  | 80.1  | 6.24 (d, 1.5)       | 80.1  | 6.23 (d, 1.2)        |
| 2'  | 151.7 | 7.44 (d, 1.5)       | 151.7 | 7.44 (d, 1.2)        |
| 3'  | 132.3 |                     | 132.3 |                      |
| 4'  | 176.4 |                     | 176.4 |                      |
| 5'  | 24.8  | 2.54 (m)            | 24.8  | 2.54 (td, 7.8, 1.2)  |
| 6'  | 27.9  | 2.68 (m)            | 27.9  | 2.68 (dd, 14.4, 7.8) |
| 7'  | 154.5 | 6.59 (overlap)      | 154.5 | 6.61-6.59 (m)        |
| 8'  | 141.4 |                     | 141.4 |                      |
| 9'  | 196.9 | 9.34 (s)            | 196.9 | 9.35 (s)             |
| 10' | 9.2   | 1.71 (s)            | 9.2   | 1.71 (d, 1.2)        |

**Table S4. NMR spectroscopic data (CD<sub>3</sub>OD) for natural applanatumol U (3) and synthetic (–)-applanatumol U (3).**

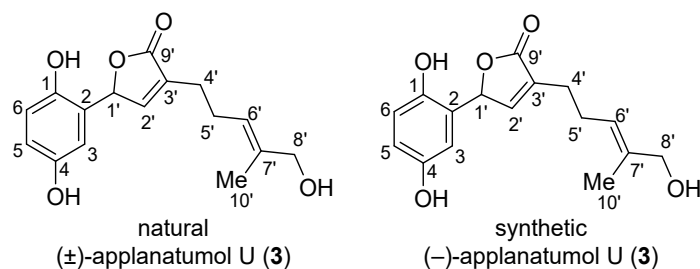

| No. | Natural (±)-3 |                              | Synthetic (–)-3 |                              |
|-----|---------------|------------------------------|-----------------|------------------------------|
|     | $\delta_C$    | $\delta_H$ (mult, $J$ in Hz) | $\delta_C$      | $\delta_H$ (mult, $J$ in Hz) |
| 1   | 149.0         |                              | 149.0           |                              |
| 2   | 123.4         |                              | 123.4           |                              |
| 3   | 113.4         | 6.46 (d, 2.9)                | 113.4           | 6.44 (d, 3.0)                |
| 4   | 151.5         |                              | 151.5           |                              |
| 5   | 117.2         | 6.62 (dd, 8.9, 2.9)          | 117.2           | 6.60 (dd, 9.0, 3.0)          |
| 6   | 117.3         | 6.68 (d, 8.9)                | 117.3           | 6.67 (d, 9.0)                |
| 1'  | 79.7          | 6.25 (br s)                  | 79.7            | 6.24 (d, 1.2)                |
| 2'  | 151.2         | 7.35 (br s)                  | 151.2           | 7.35 (d, 1.2)                |
| 3'  | 133.1         |                              | 133.1           |                              |
| 4'  | 25.9          | 2.37 (overlap)               | 26.0            | 2.40-2.30 (m)                |
| 5'  | 26.5          | 2.37 (overlap)               | 26.5            | 2.40-2.30 (m)                |
| 6'  | 124.8         | 5.41 (t, 7.1)                | 124.8           | 5.40 (br t, 7.2)             |
| 7'  | 137.5         |                              | 137.6           |                              |
| 8'  | 68.6          | 3.91 (s)                     | 68.6            | 3.90 (s)                     |
| 9'  | 176.7         |                              | 176.7           |                              |
| 10' | 13.8          | 1.62 (s)                     | 13.8            | 1.61 (s)                     |

**Table S5. NMR spectroscopic data (acetone-*d*<sub>6</sub>) for natural (+)-fornicin A (4) and synthetic (–)-*ent*-fornicin (4).**

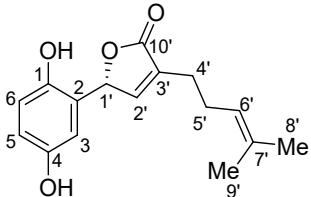

natural  
(+)-fornicin A (4)



synthetic  
(–)-*ent*-fornicin A (4)

| No.  | Natural (+)-4 |                                   | Synthetic (–)-4 |                                   |
|------|---------------|-----------------------------------|-----------------|-----------------------------------|
|      | $\delta_C$    | $\delta_H$ (mult, <i>J</i> in Hz) | $\delta_C$      | $\delta_H$ (mult, <i>J</i> in Hz) |
| 1    | 148.2         |                                   | 148.2           |                                   |
| 2    | 123.6         |                                   | 123.8           |                                   |
| 3    | 113.2         | 6.53 (d, 2.9)                     | 113.2           | 6.53 (d, 2.4)                     |
| 4    | 151.3         |                                   | 151.5           |                                   |
| 5    | 116.8         | 6.65 (dd, 8.6, 2.9)               | 116.8           | 6.65 (dd, 9.0, 2.4)               |
| 6    | 117.0         | 6.76 (d, 8.6)                     | 117.1           | 6.75 (d, 9.0)                     |
| 1'   | 78.3          | 6.20 (d, 1.4)                     | 78.2            |                                   |
| 2'   | 149.5         | 7.35 (d, 1.4)                     | 149.4           | 7.35 (d, 1.8)                     |
| 3'   | 132.7         |                                   | 132.8           |                                   |
| 4'   | 26.6          | 2.30 (m)                          | 26.7            | 2.33-2.30 (m)                     |
| 5'   | 25.9          | 2.28 (m)                          | 26.0            | 2.29-2.25 (brm)                   |
| 6'   | 123.9         | 5.12 (br t, 6.9)                  | 124.0           | 5.13 (brt, 7.2)                   |
| 7'   | 133.1         |                                   | 133.2           |                                   |
| 8'   | 25.7          | 1.64 (s)                          | 25.7            | 1.64 (d, 1.2)                     |
| 9'   | 17.7          | 1.57 (s)                          | 17.7            | 1.58 (s)                          |
| 10'  | 174.6         |                                   | 174.4           |                                   |
| PhOH |               |                                   |                 | 8.26 (s)<br>7.80 (s)              |



Figure S1. <sup>1</sup>H NMR spectrum (600 MHz, CDCl<sub>3</sub>) of compound 13.

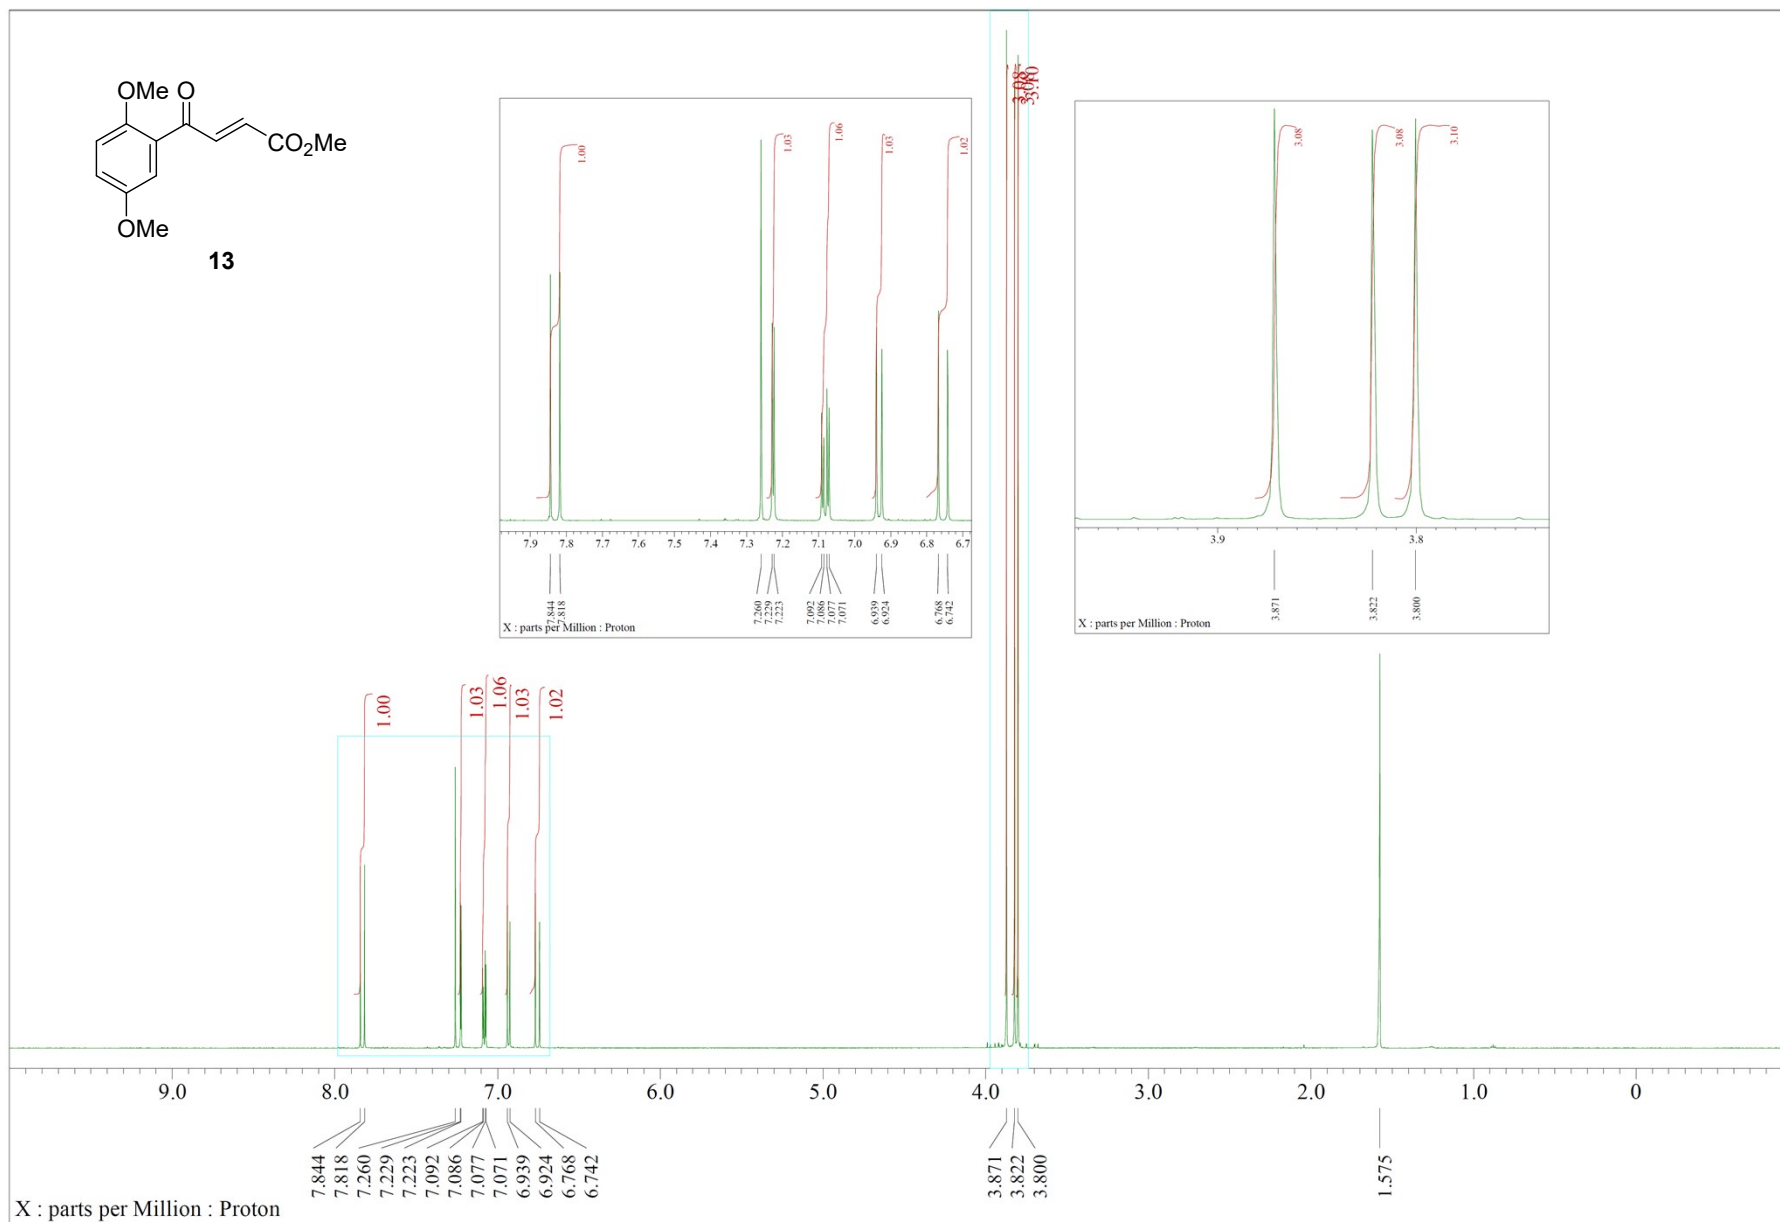

Figure S2.  $^{13}\text{C}$  NMR spectrum (150 MHz,  $\text{CDCl}_3$ ) of compound 13.

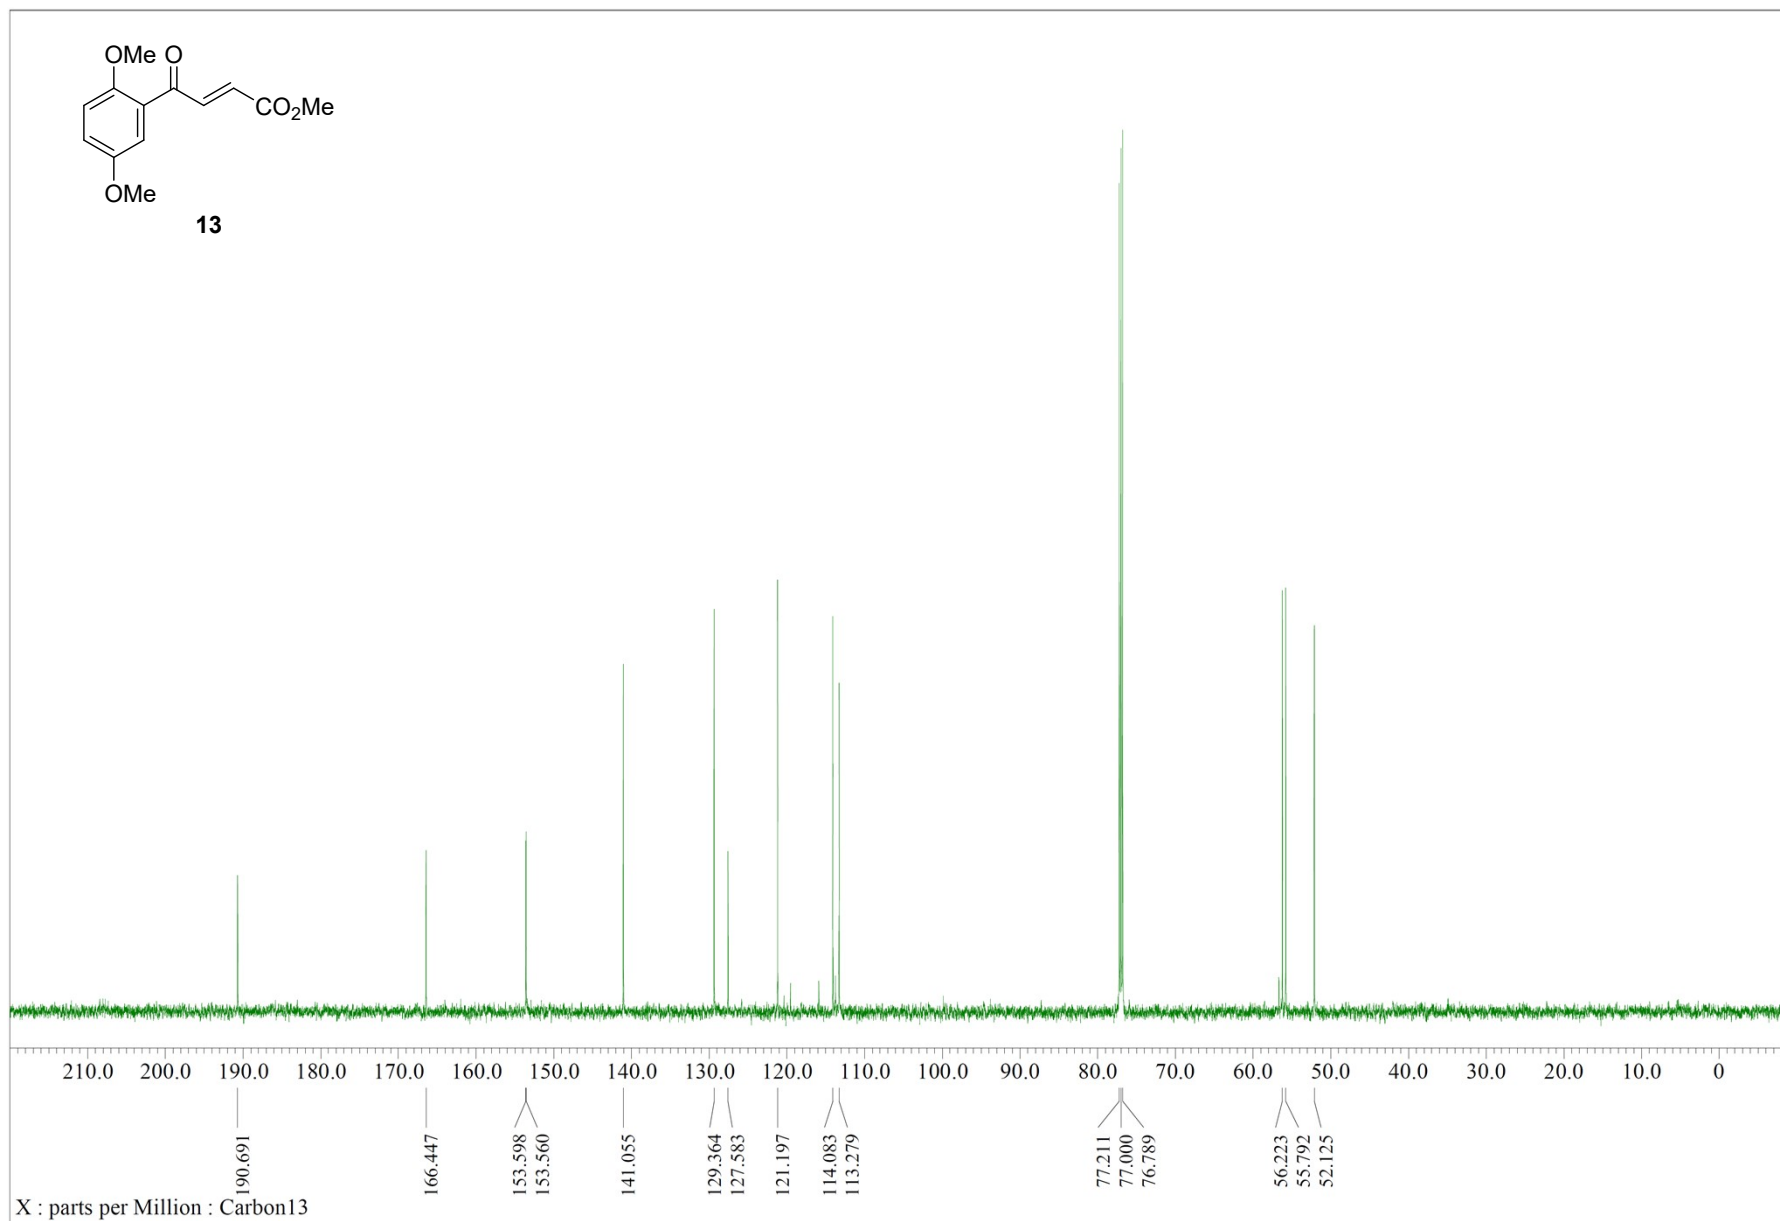

Figure S3. <sup>1</sup>H NMR spectrum (600 MHz, CDCl<sub>3</sub>) of compound 14.

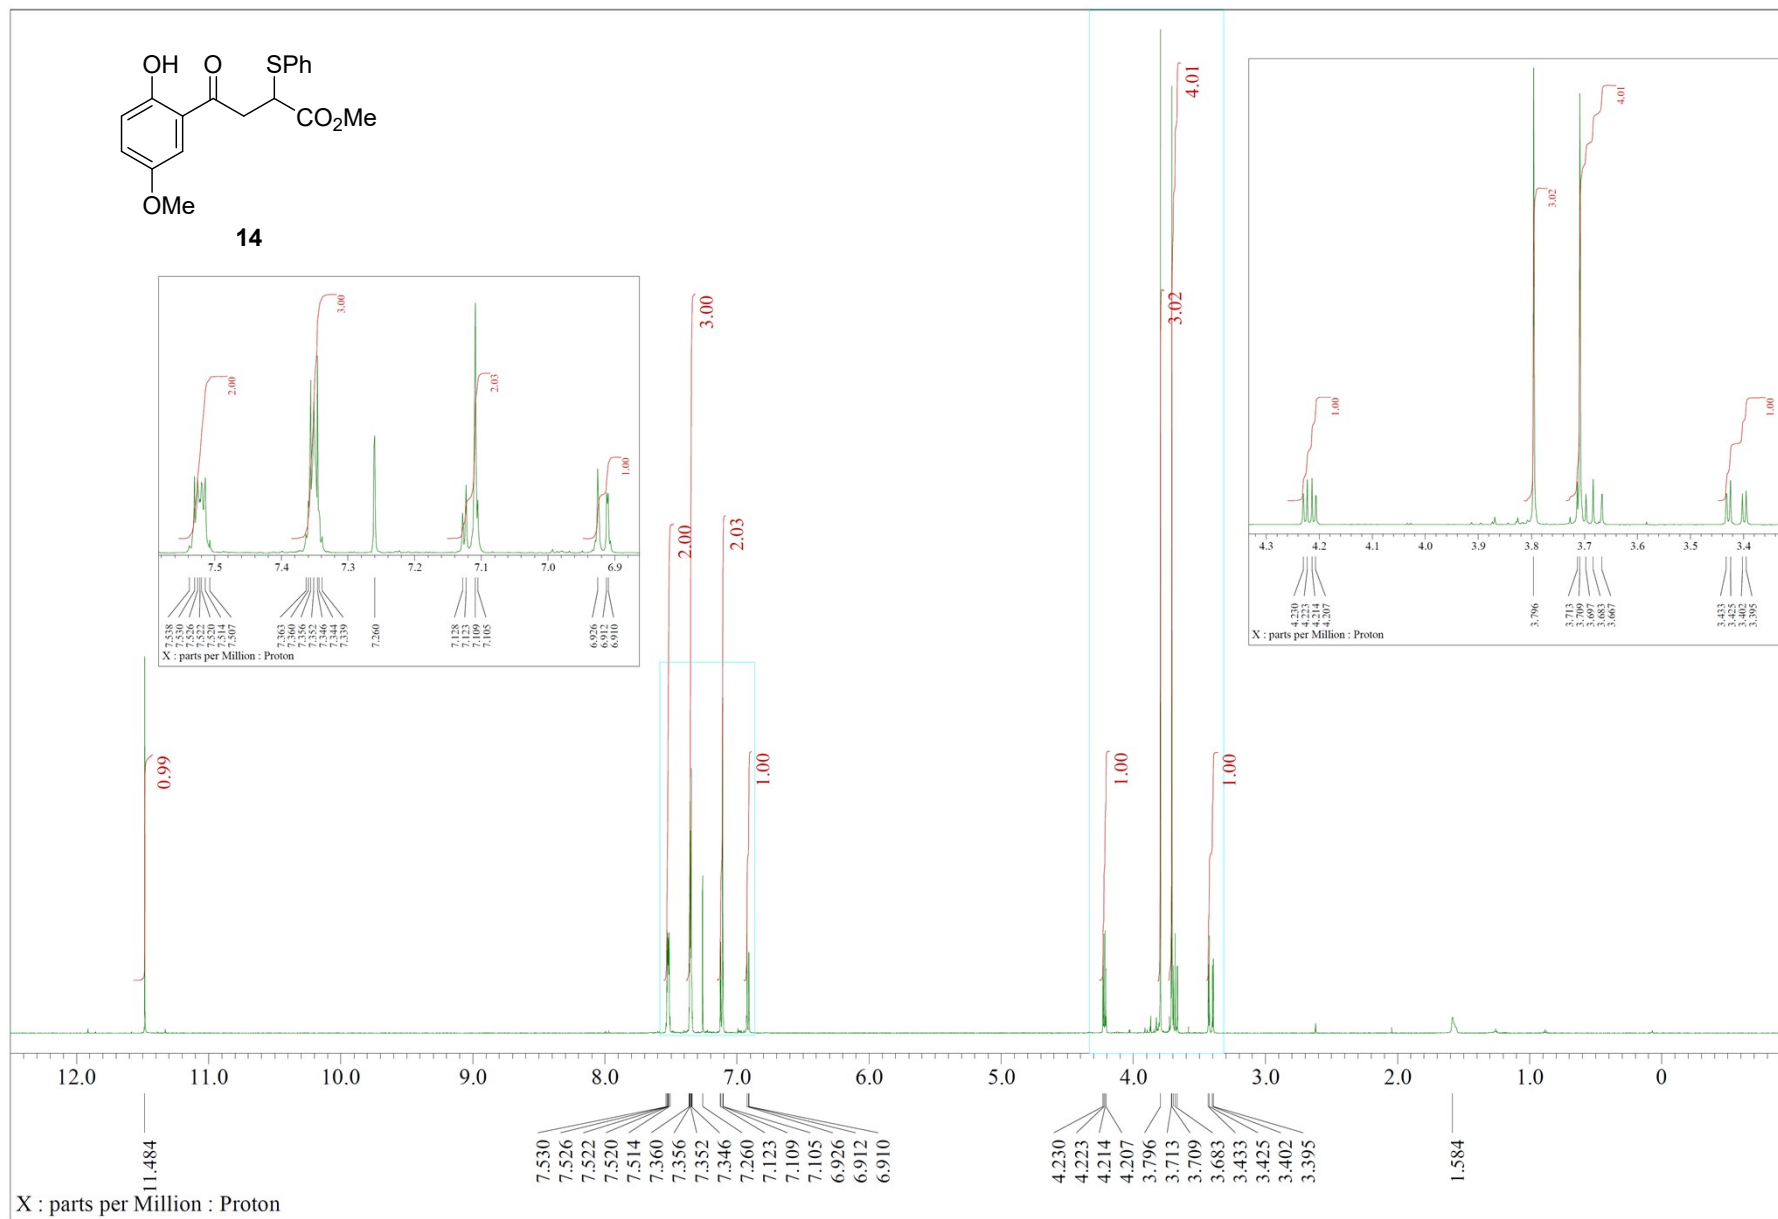

Figure S4.  $^{13}\text{C}$  NMR spectrum (150 MHz,  $\text{CDCl}_3$ ) of compound 14.

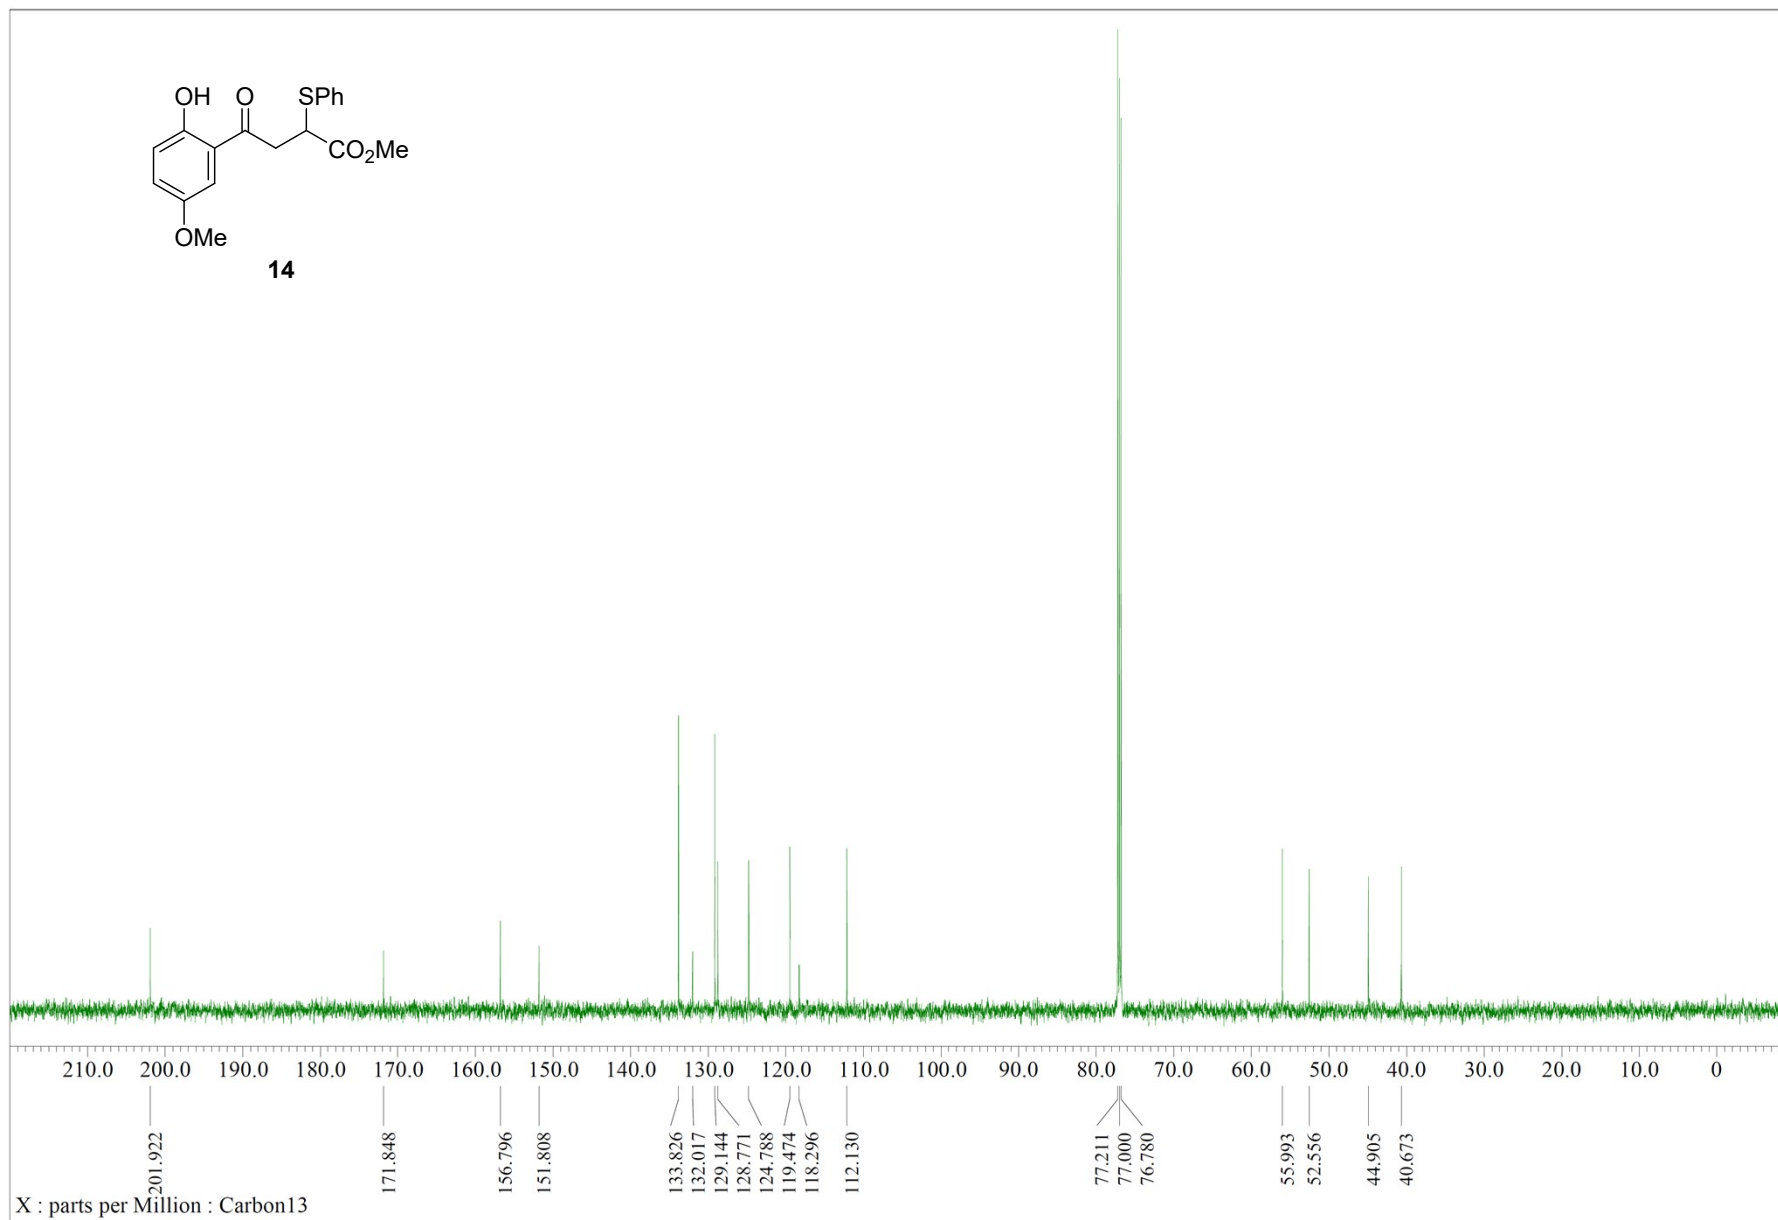

Figure S5. <sup>1</sup>H NMR spectrum (600 MHz, CDCl<sub>3</sub>) of compound 12.

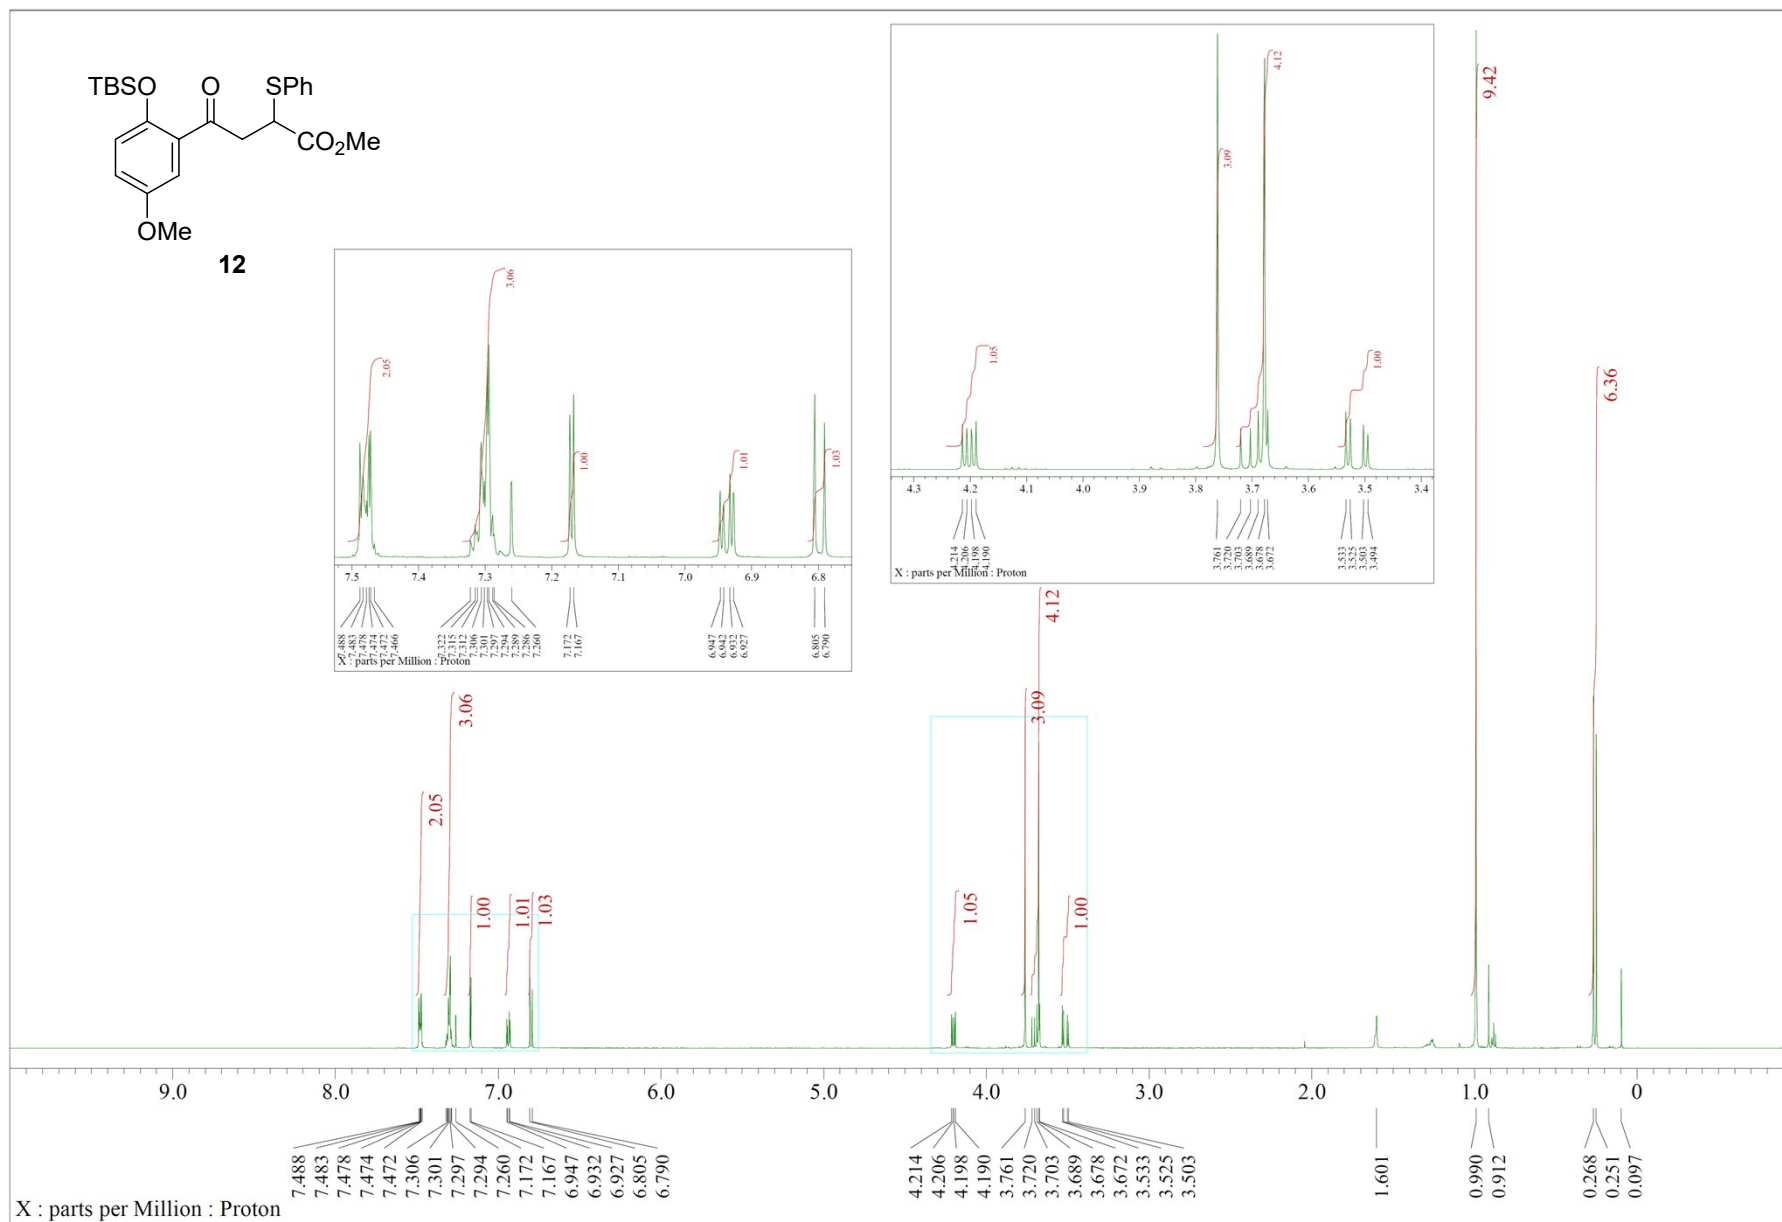

Figure S6.  $^{13}\text{C}$  NMR spectrum (150 MHz,  $\text{CDCl}_3$ ) of compound 12.

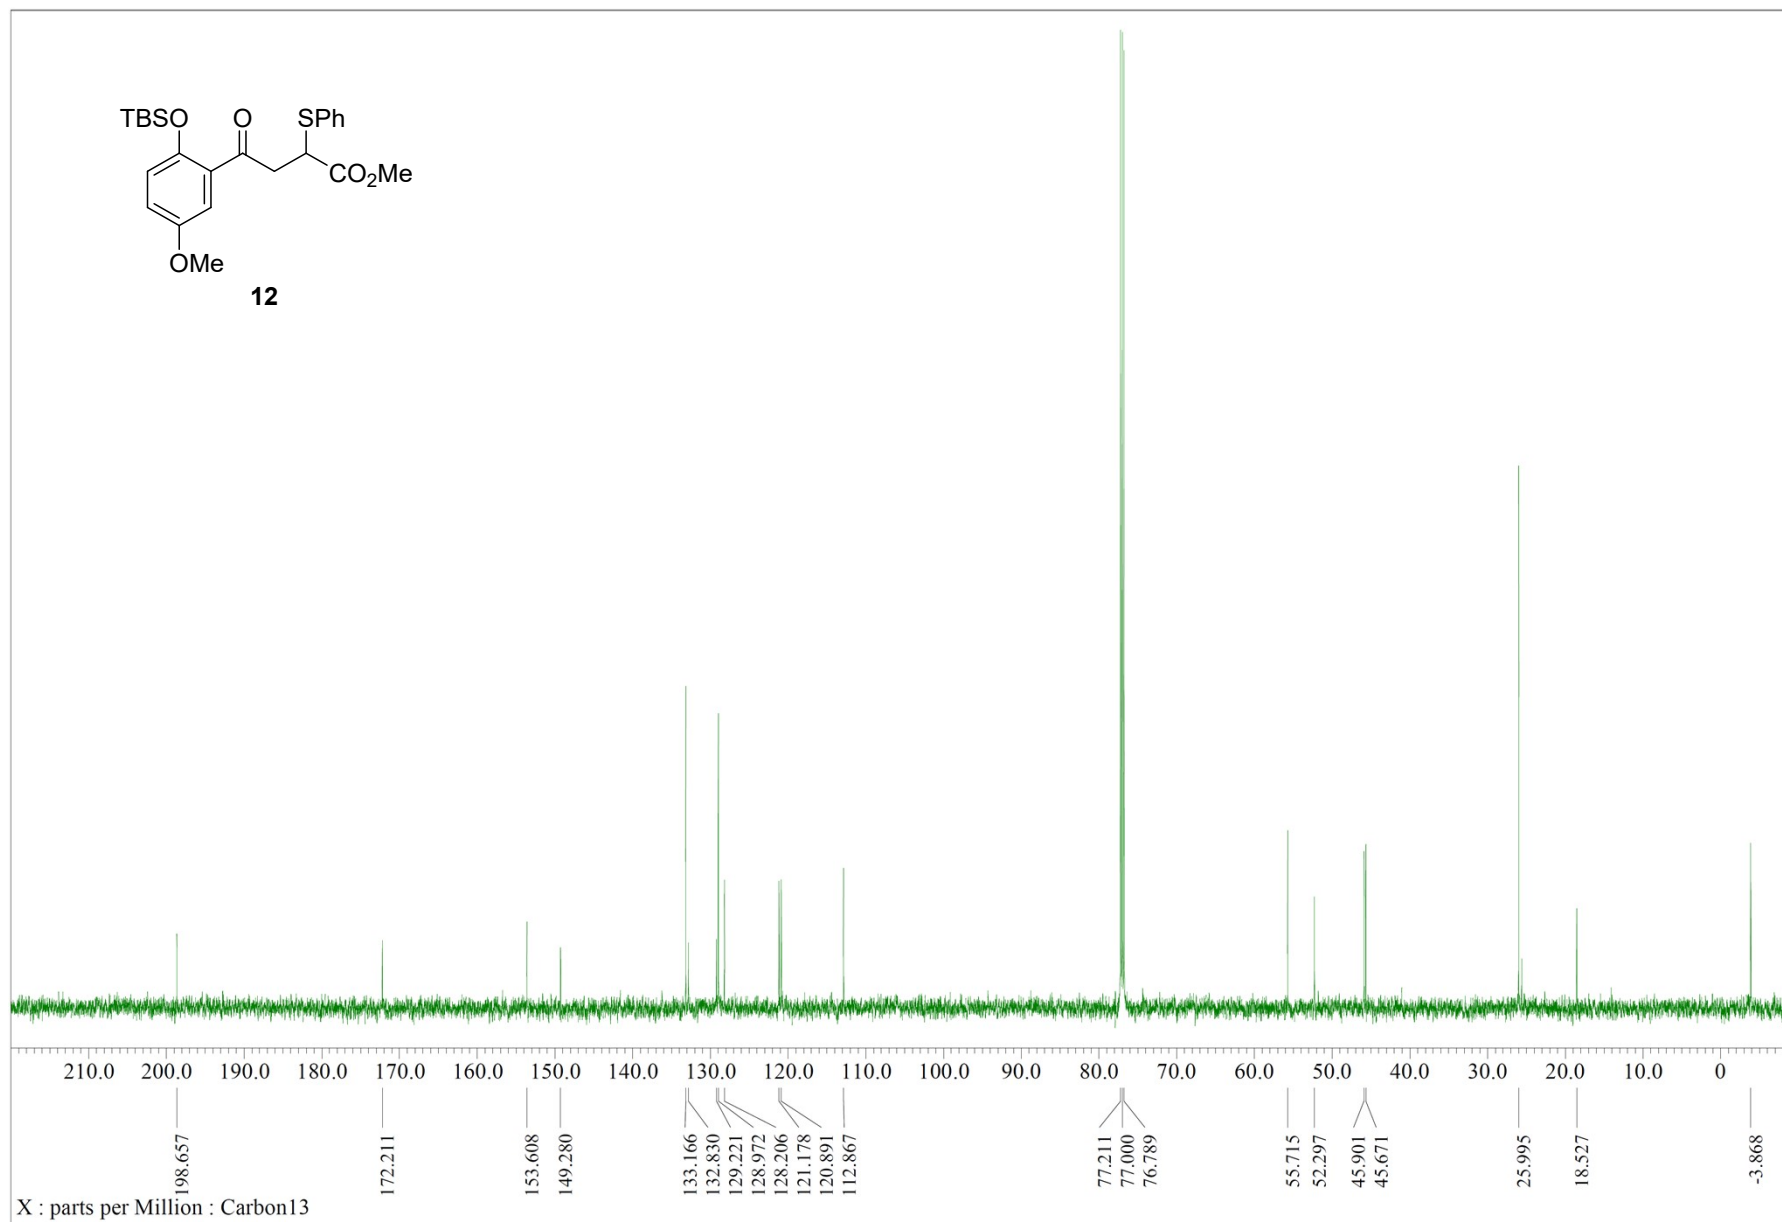

Figure S7. <sup>1</sup>H NMR spectrum (600 MHz, CDCl<sub>3</sub>, dr = 1:1.1) of compound 11.

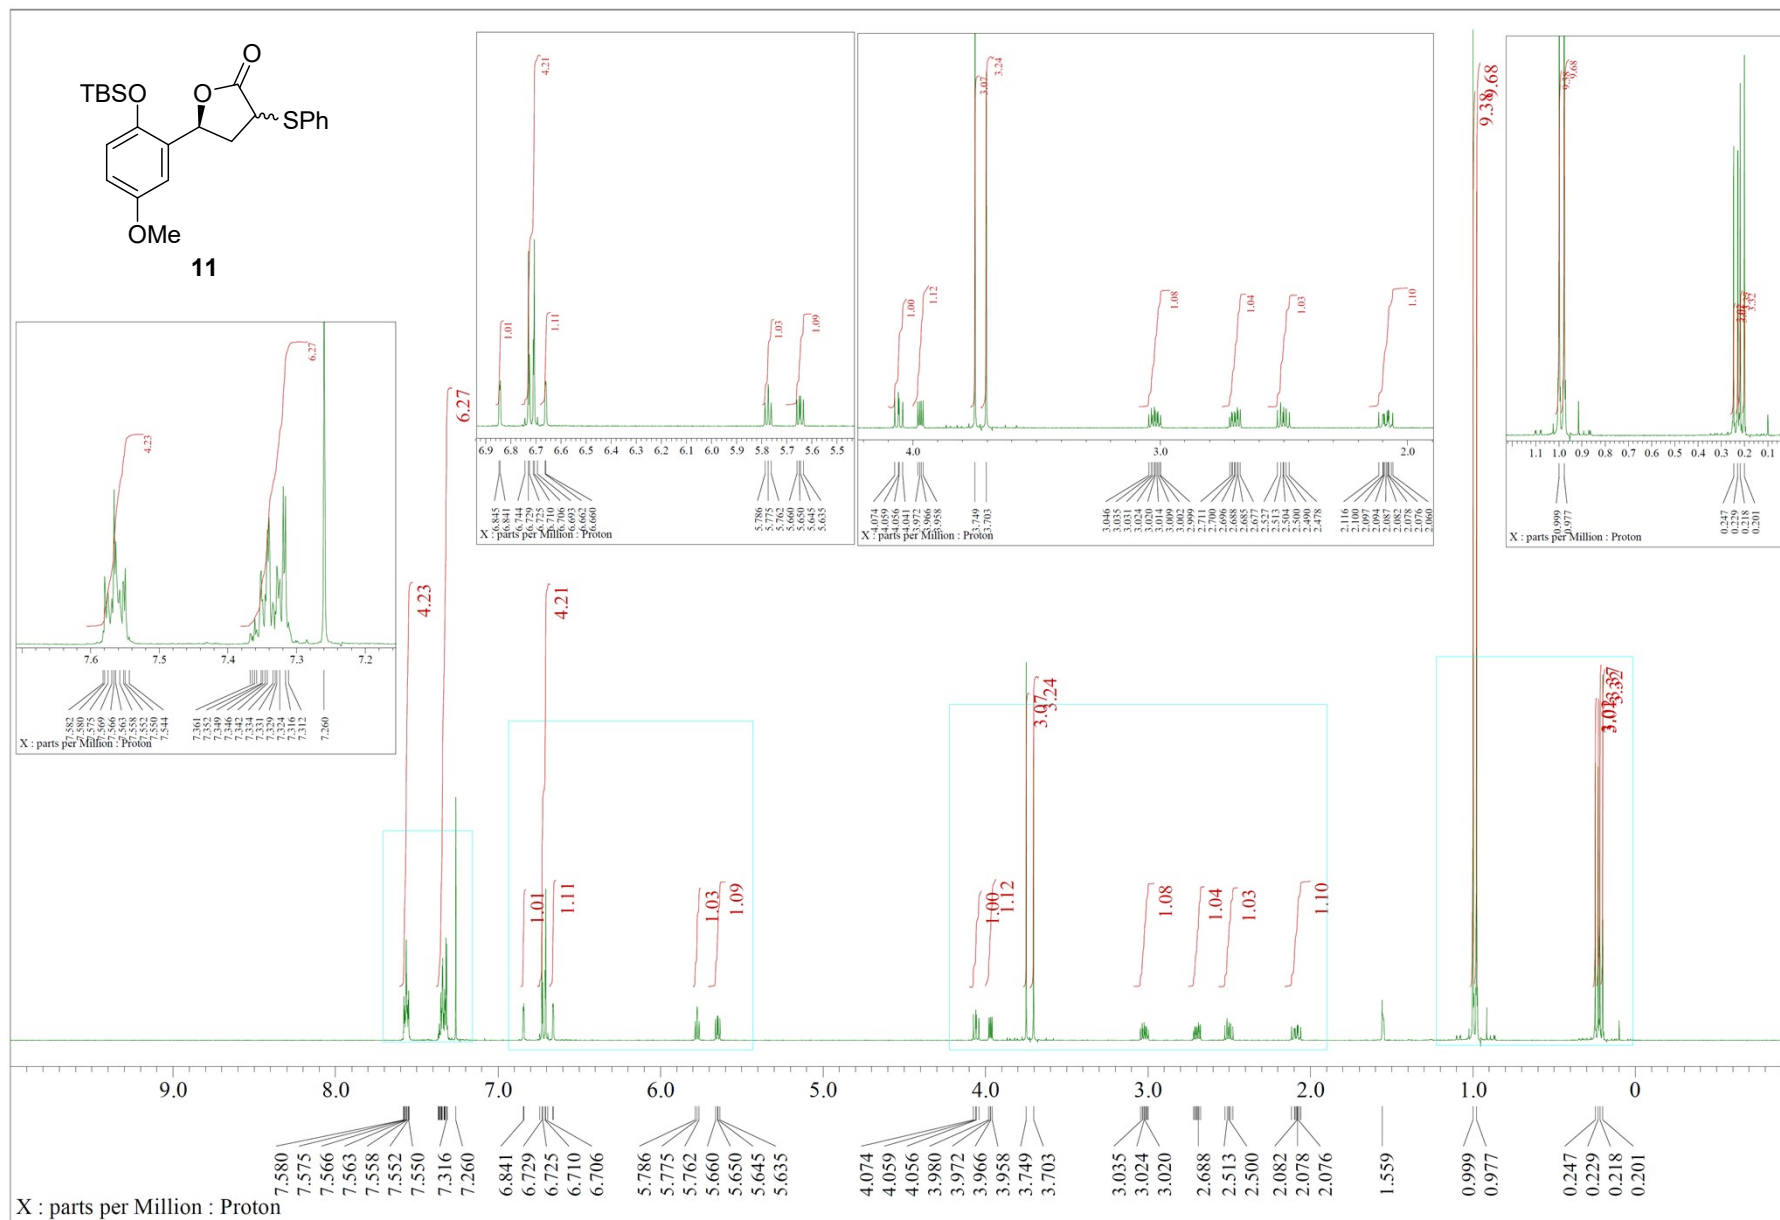

Figure S8.  $^{13}\text{C}$  NMR spectrum (150 MHz,  $\text{CD}_3\text{OD}$ , dr = 1:1.1) of compound 11.

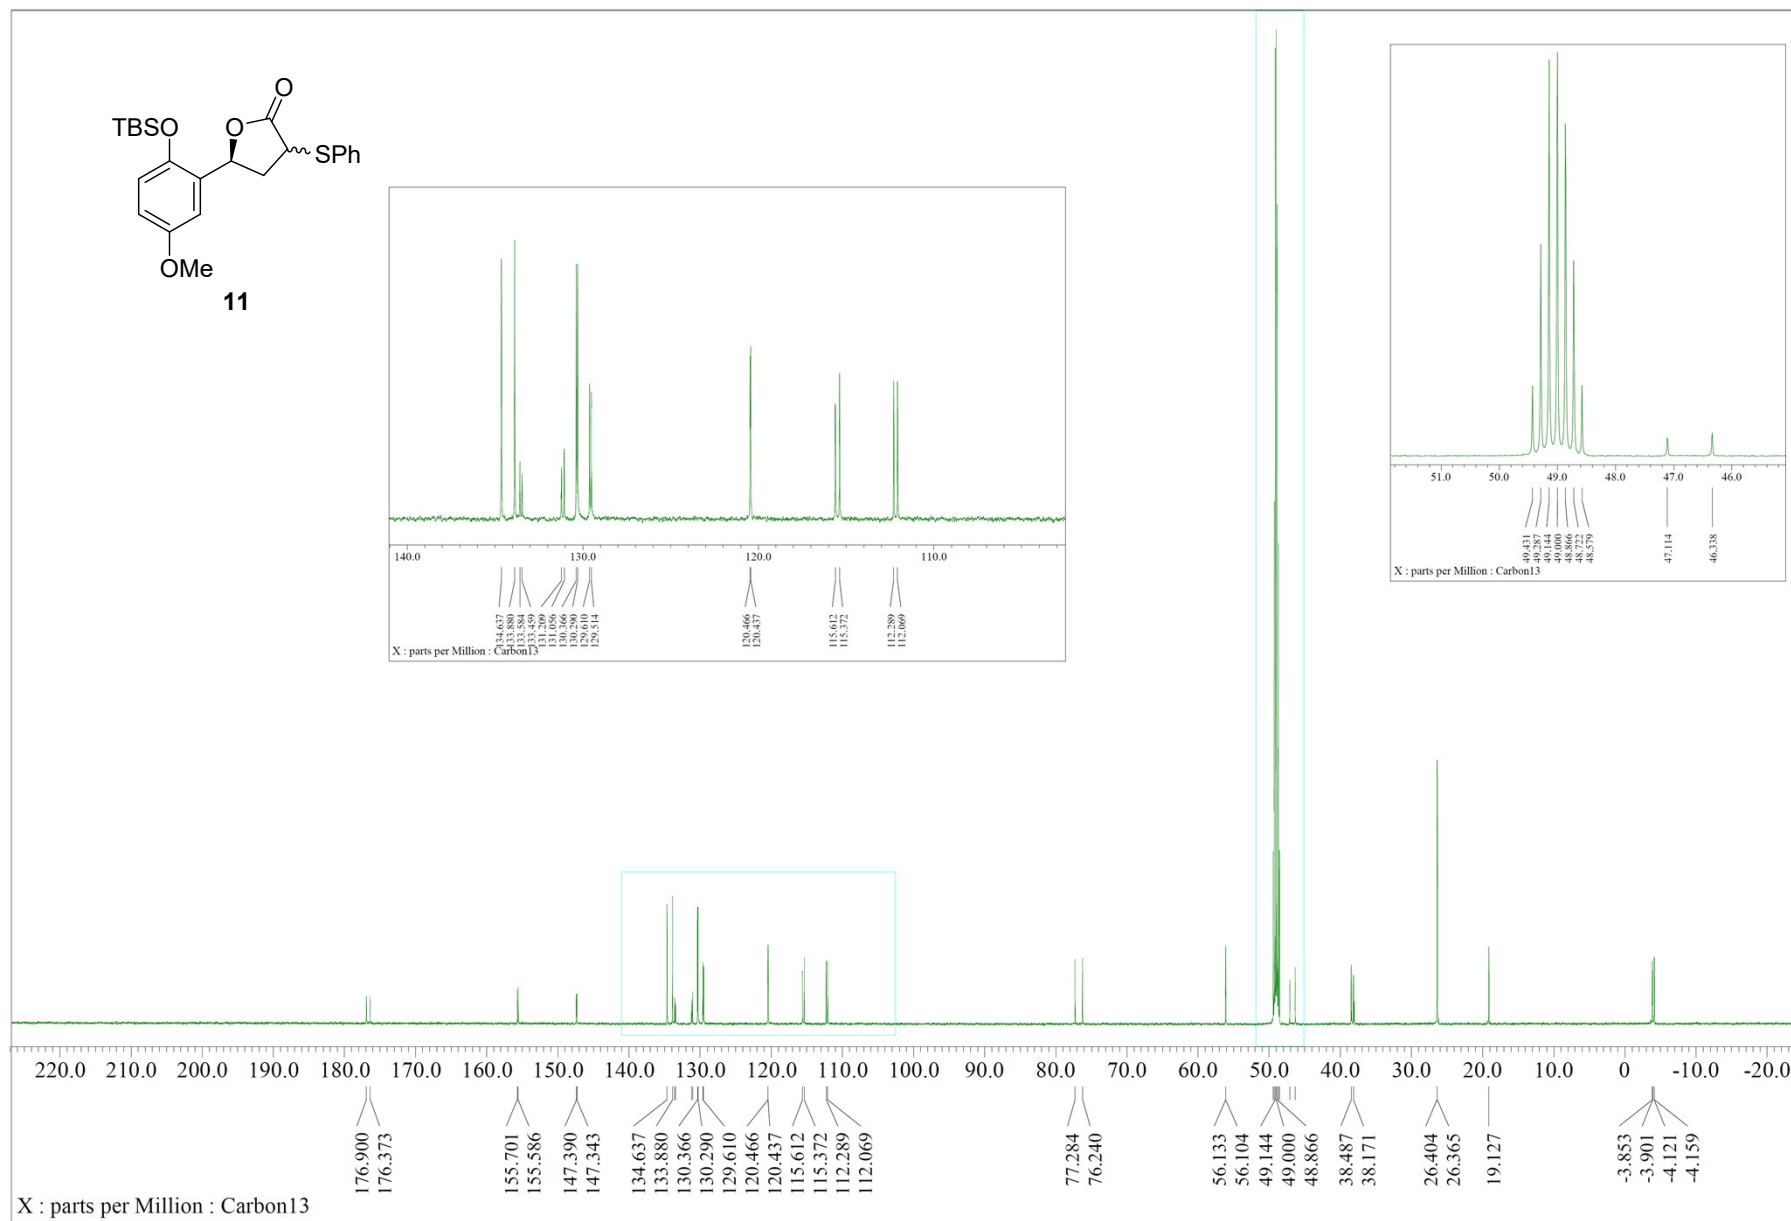



Figure S9. <sup>1</sup>H NMR spectrum (600 MHz, CDCl<sub>3</sub>, dr = 3.3:1) of compound 8.

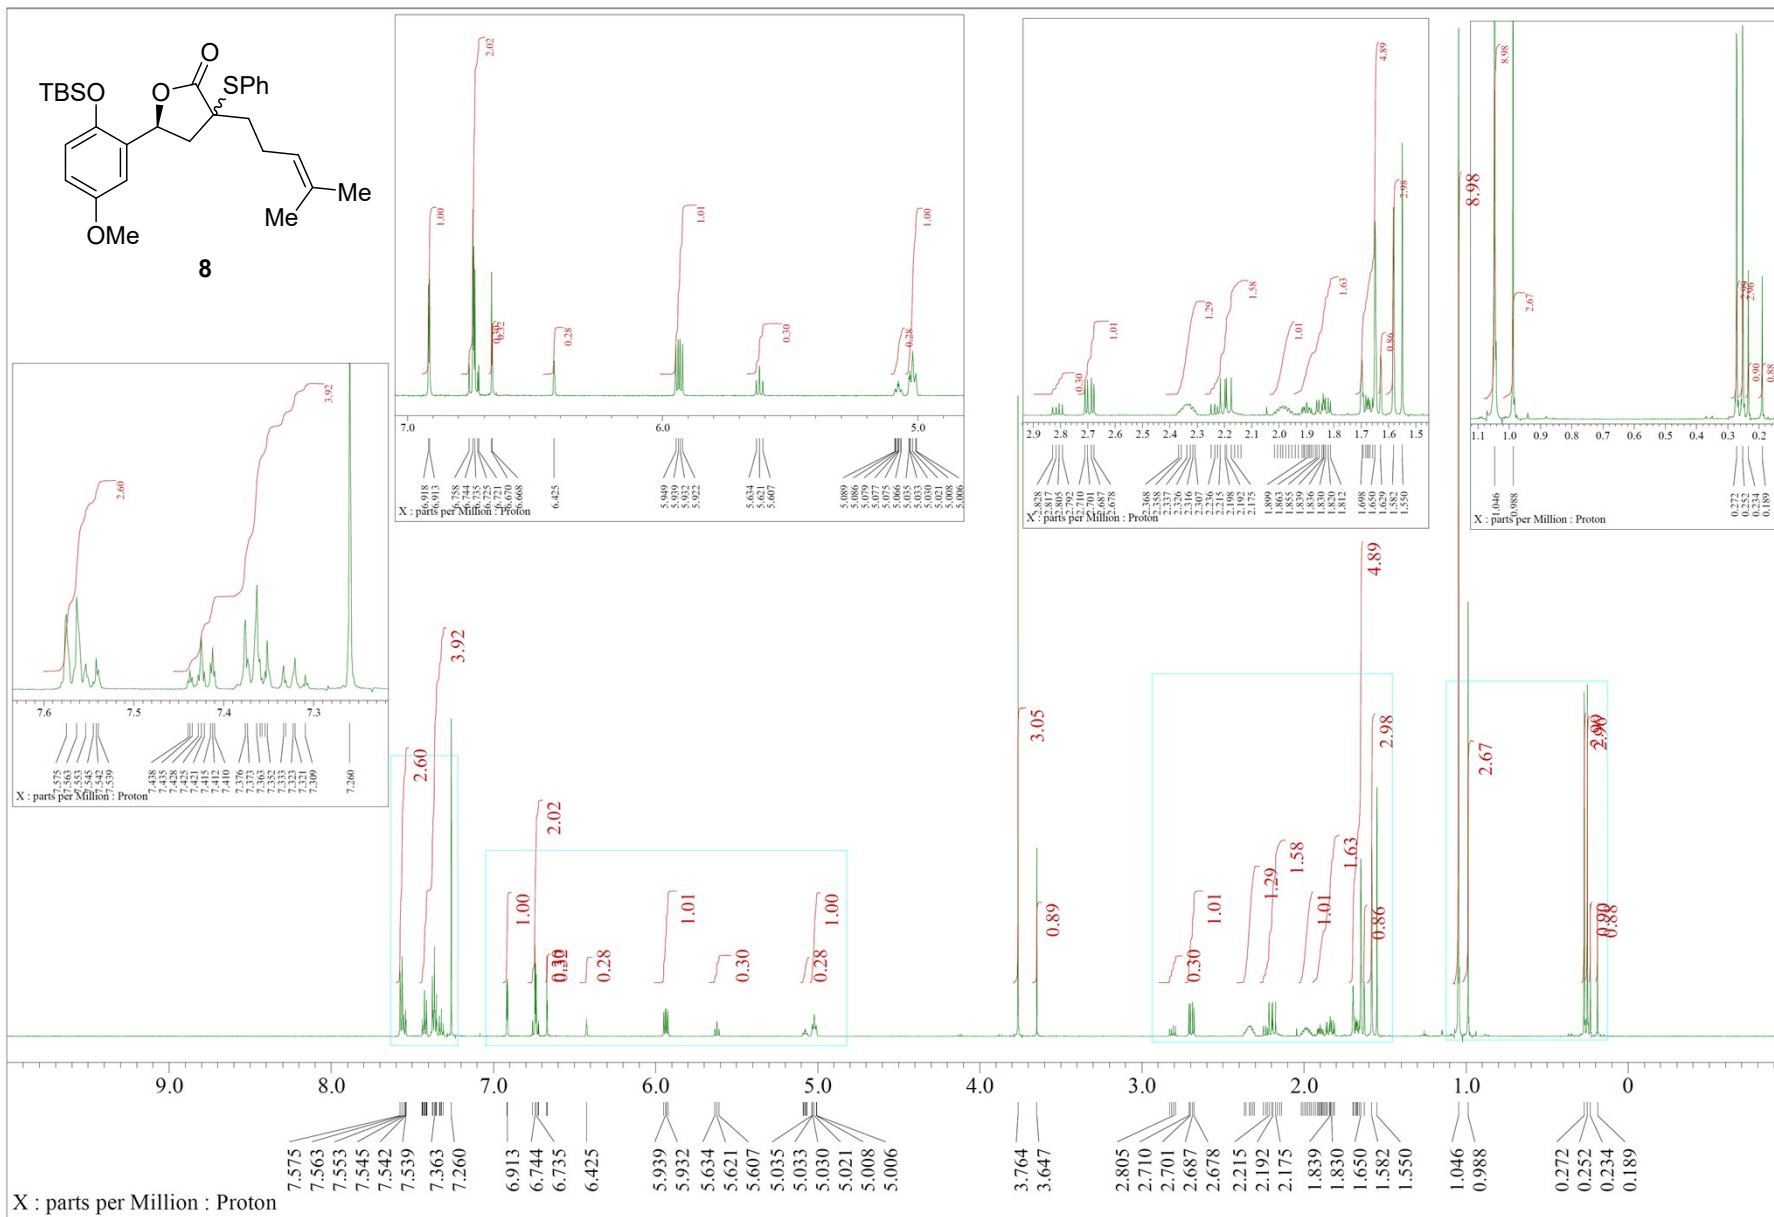

Figure S10.  $^{13}\text{C}$  NMR spectrum (150 MHz,  $\text{CDCl}_3$ , dr = 3.3:1) of compound 8.

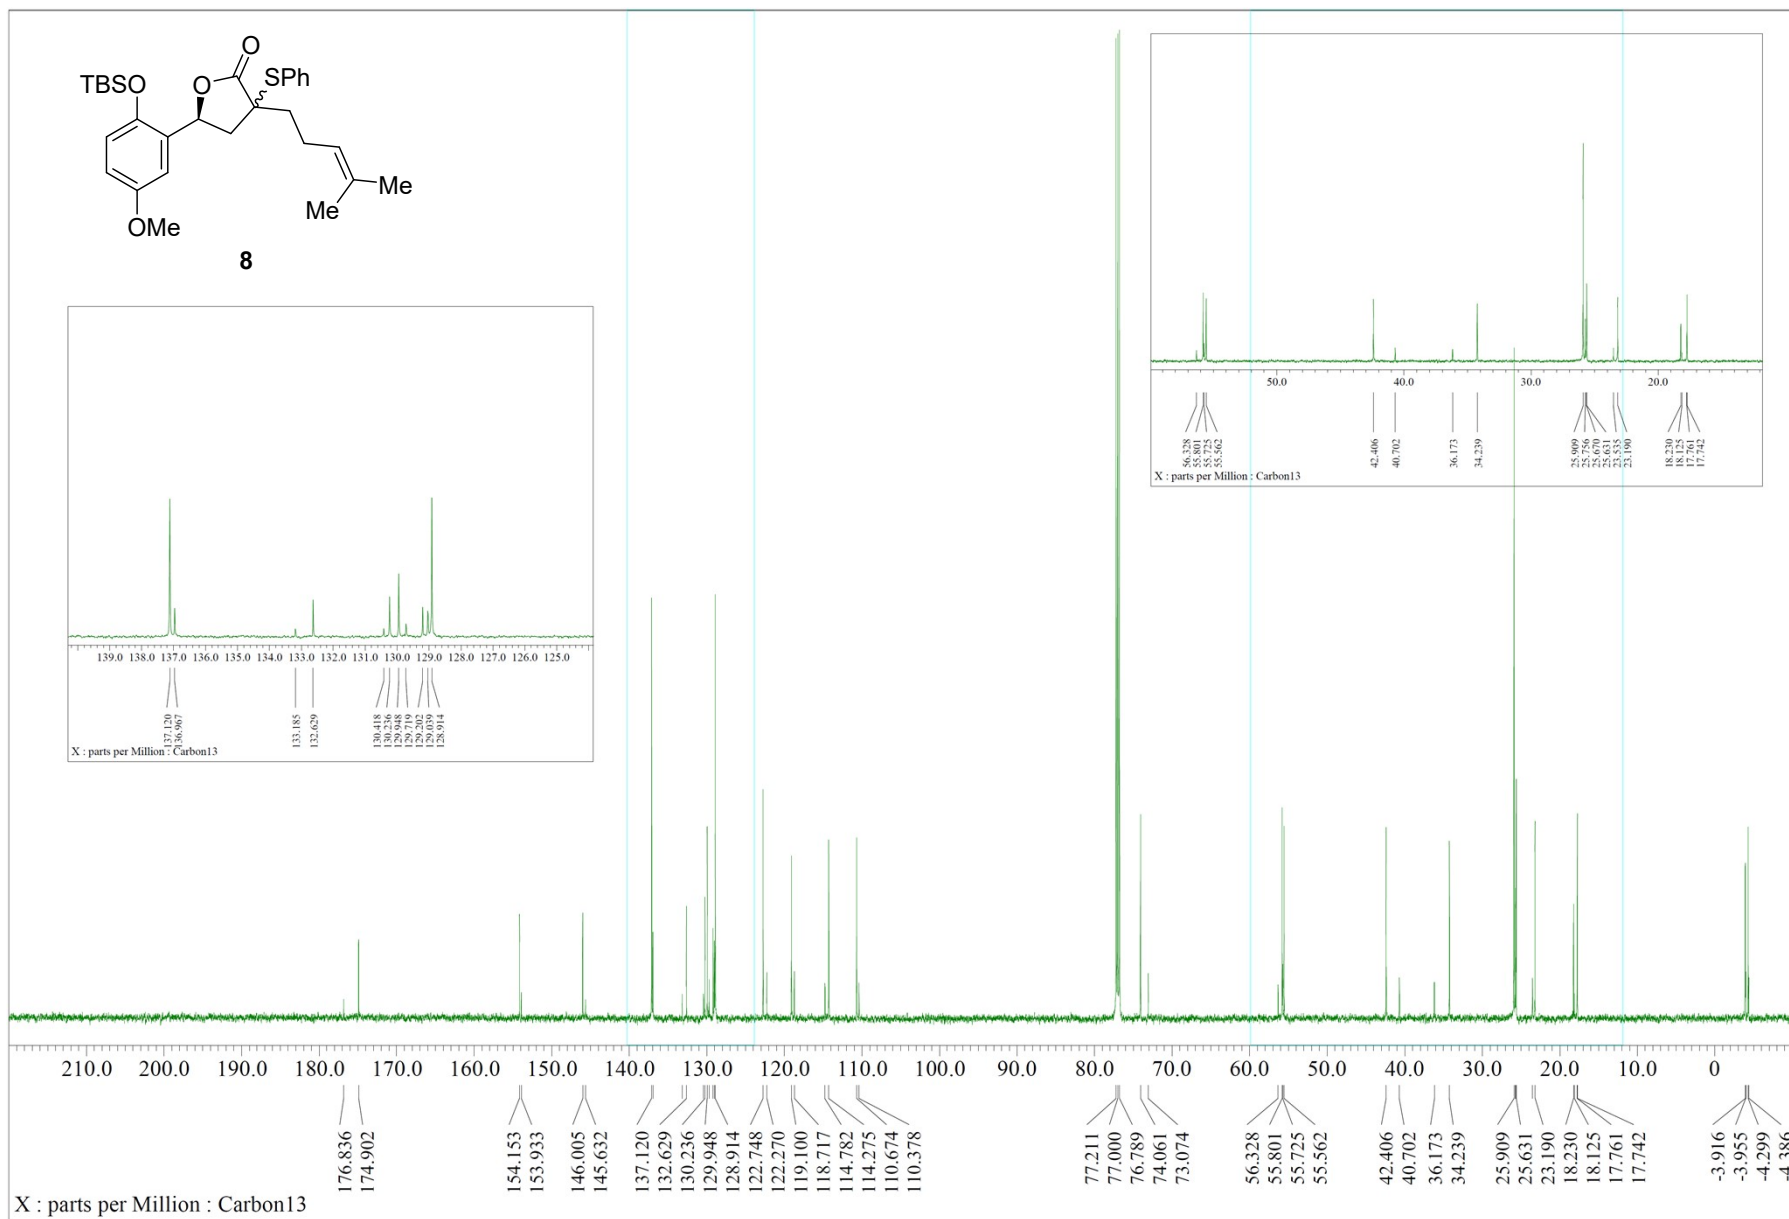

Figure S11. <sup>1</sup>H NMR spectrum (600 MHz, CDCl<sub>3</sub>) of compound 6.

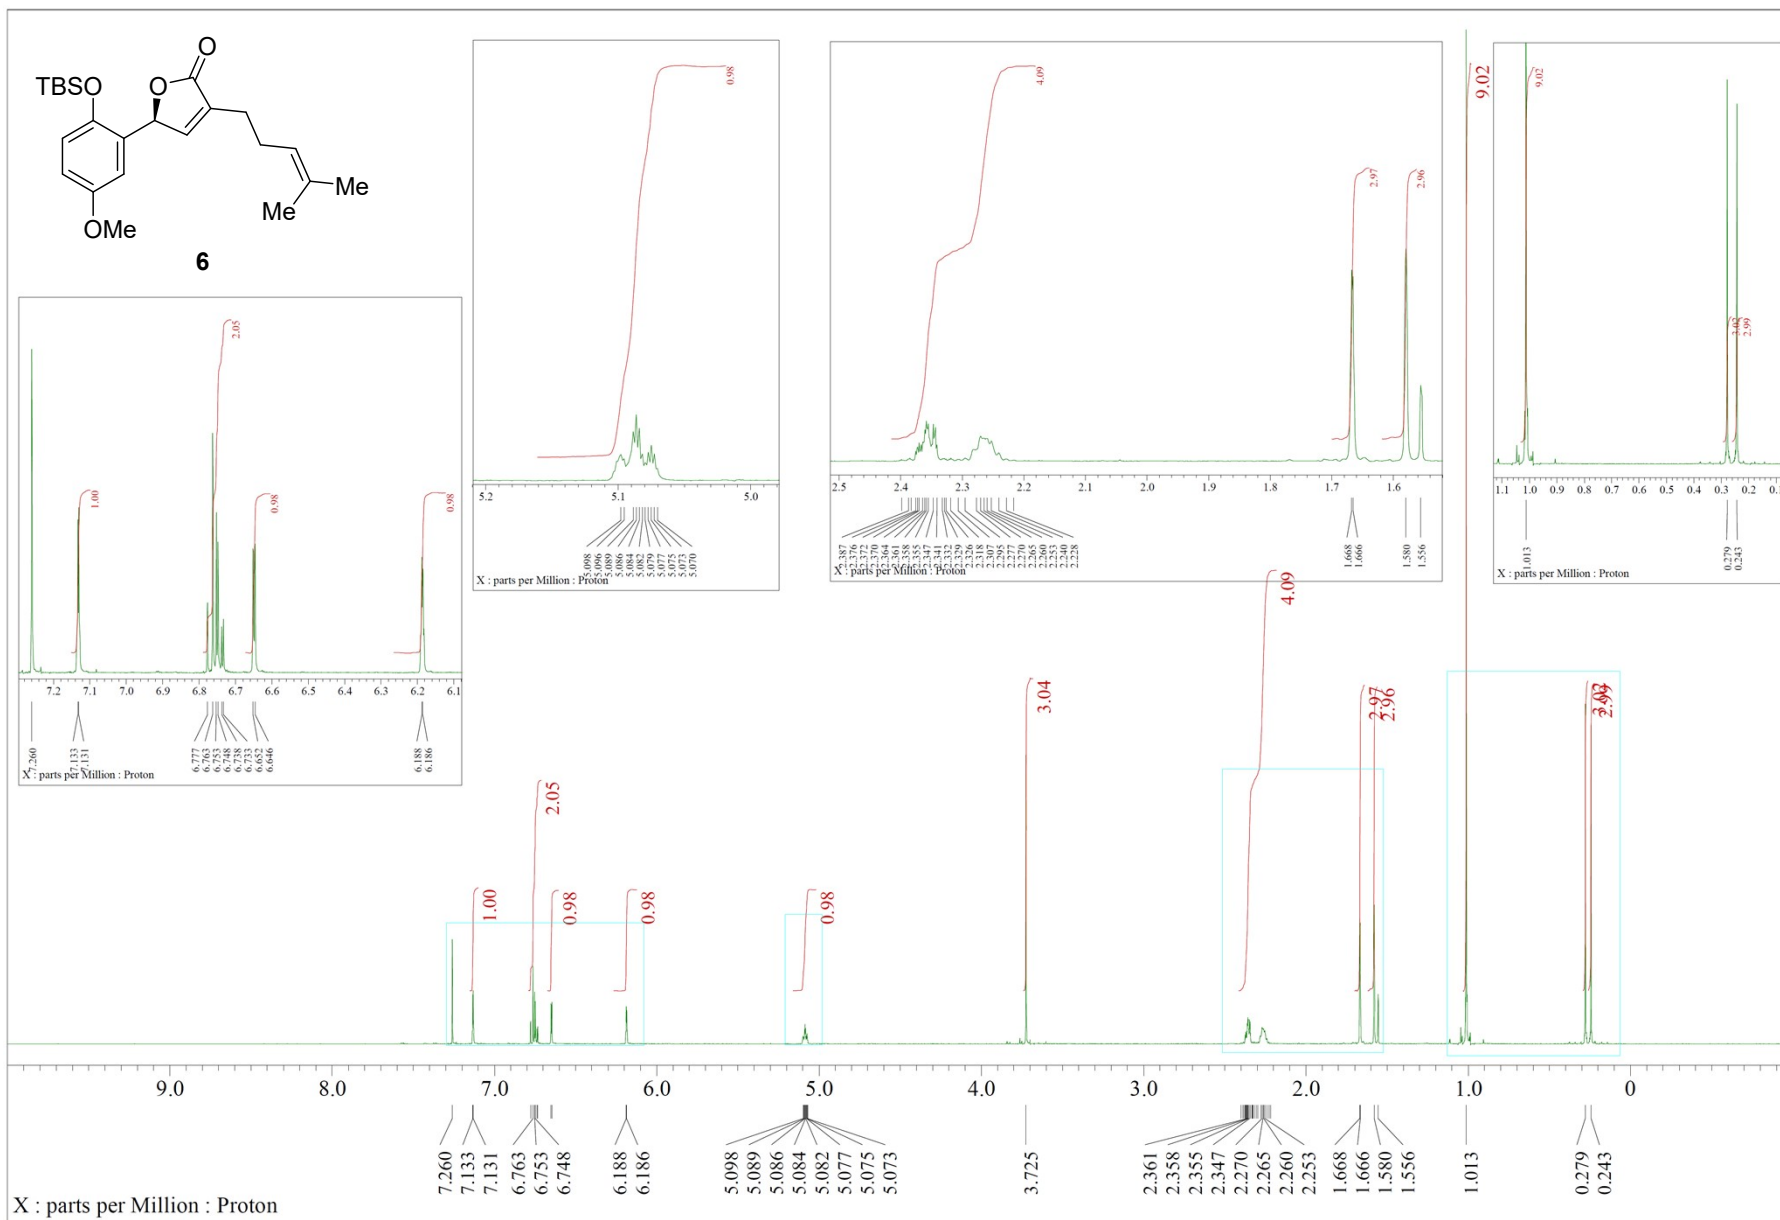

Figure S12.  $^{13}\text{C}$  NMR spectrum (150 MHz,  $\text{CDCl}_3$ ) of compound 6.

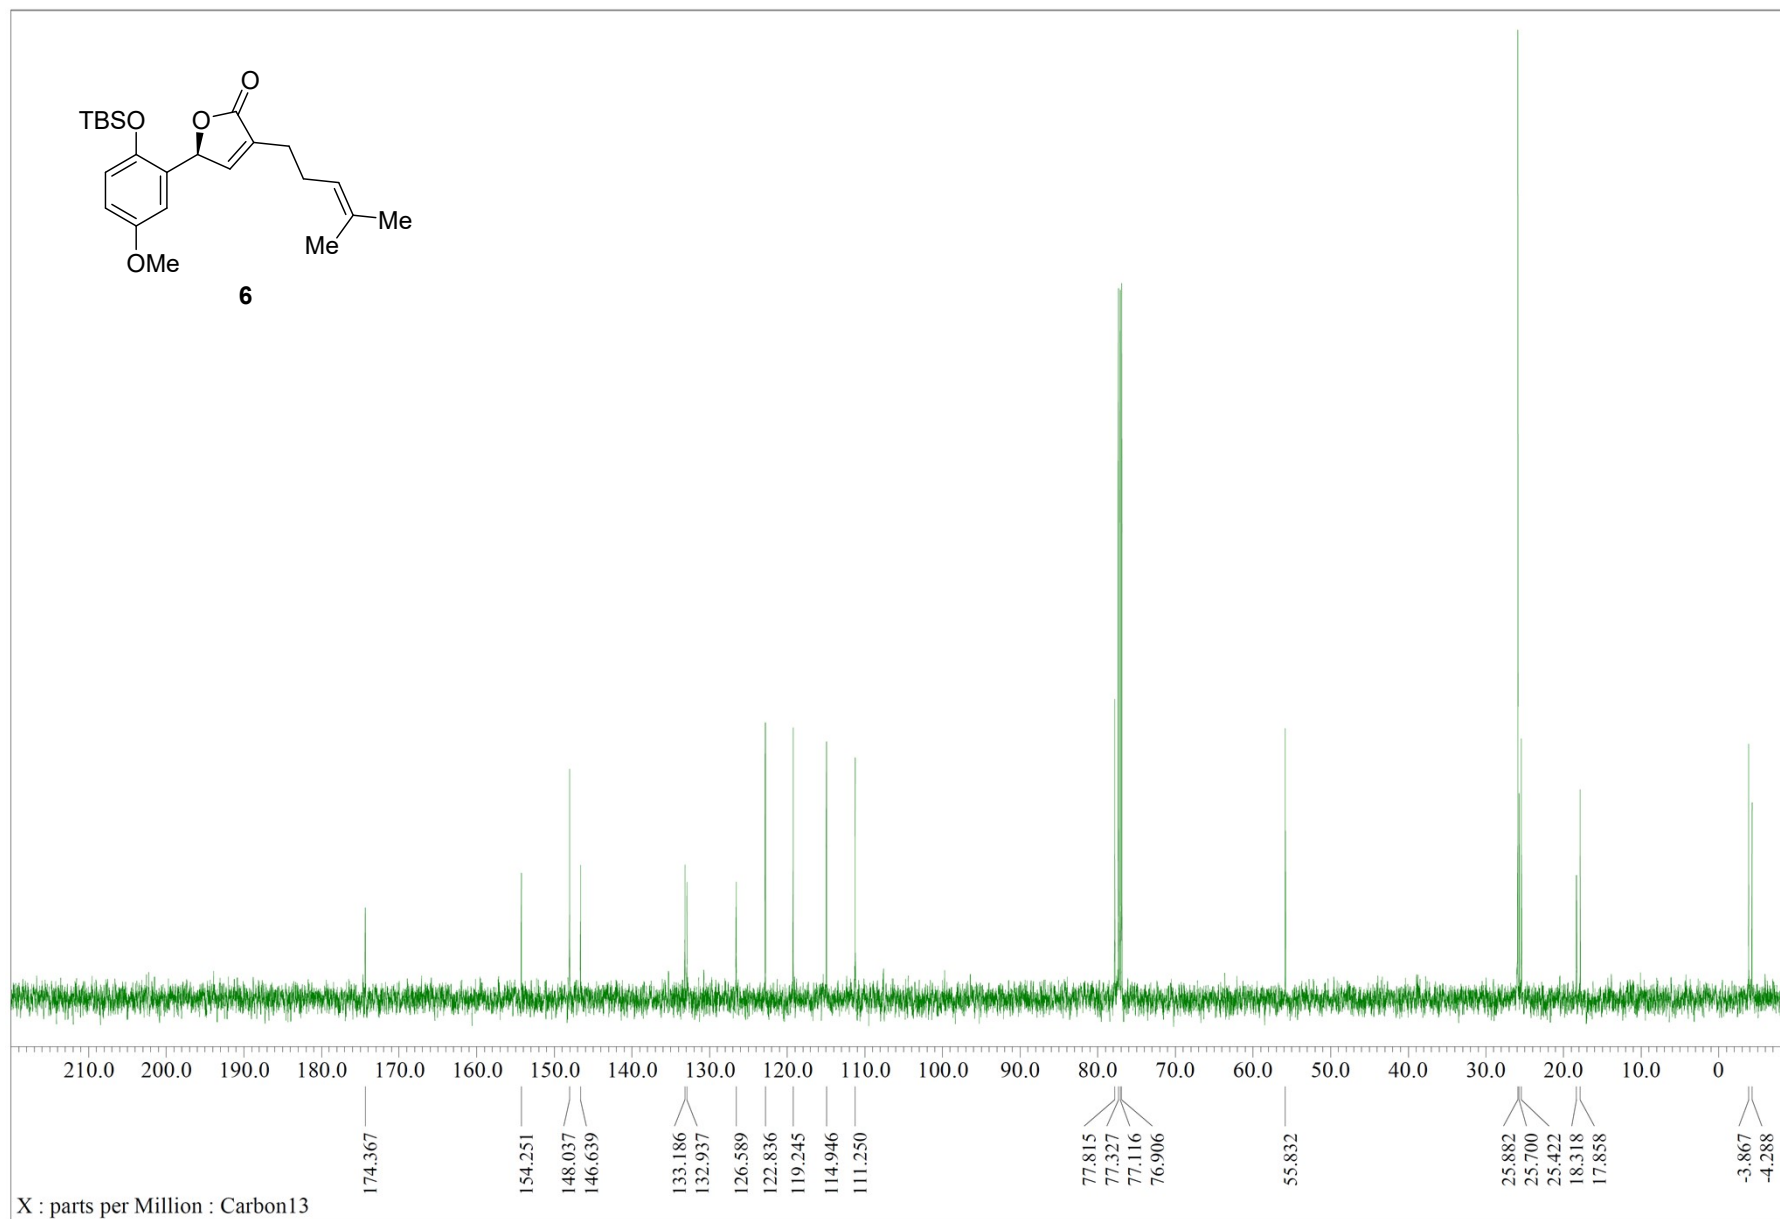

Figure S13. <sup>1</sup>H NMR spectrum (600 MHz, acetone-d<sub>6</sub>) of (-)-*ent*-fornicin A (*ent*-4).

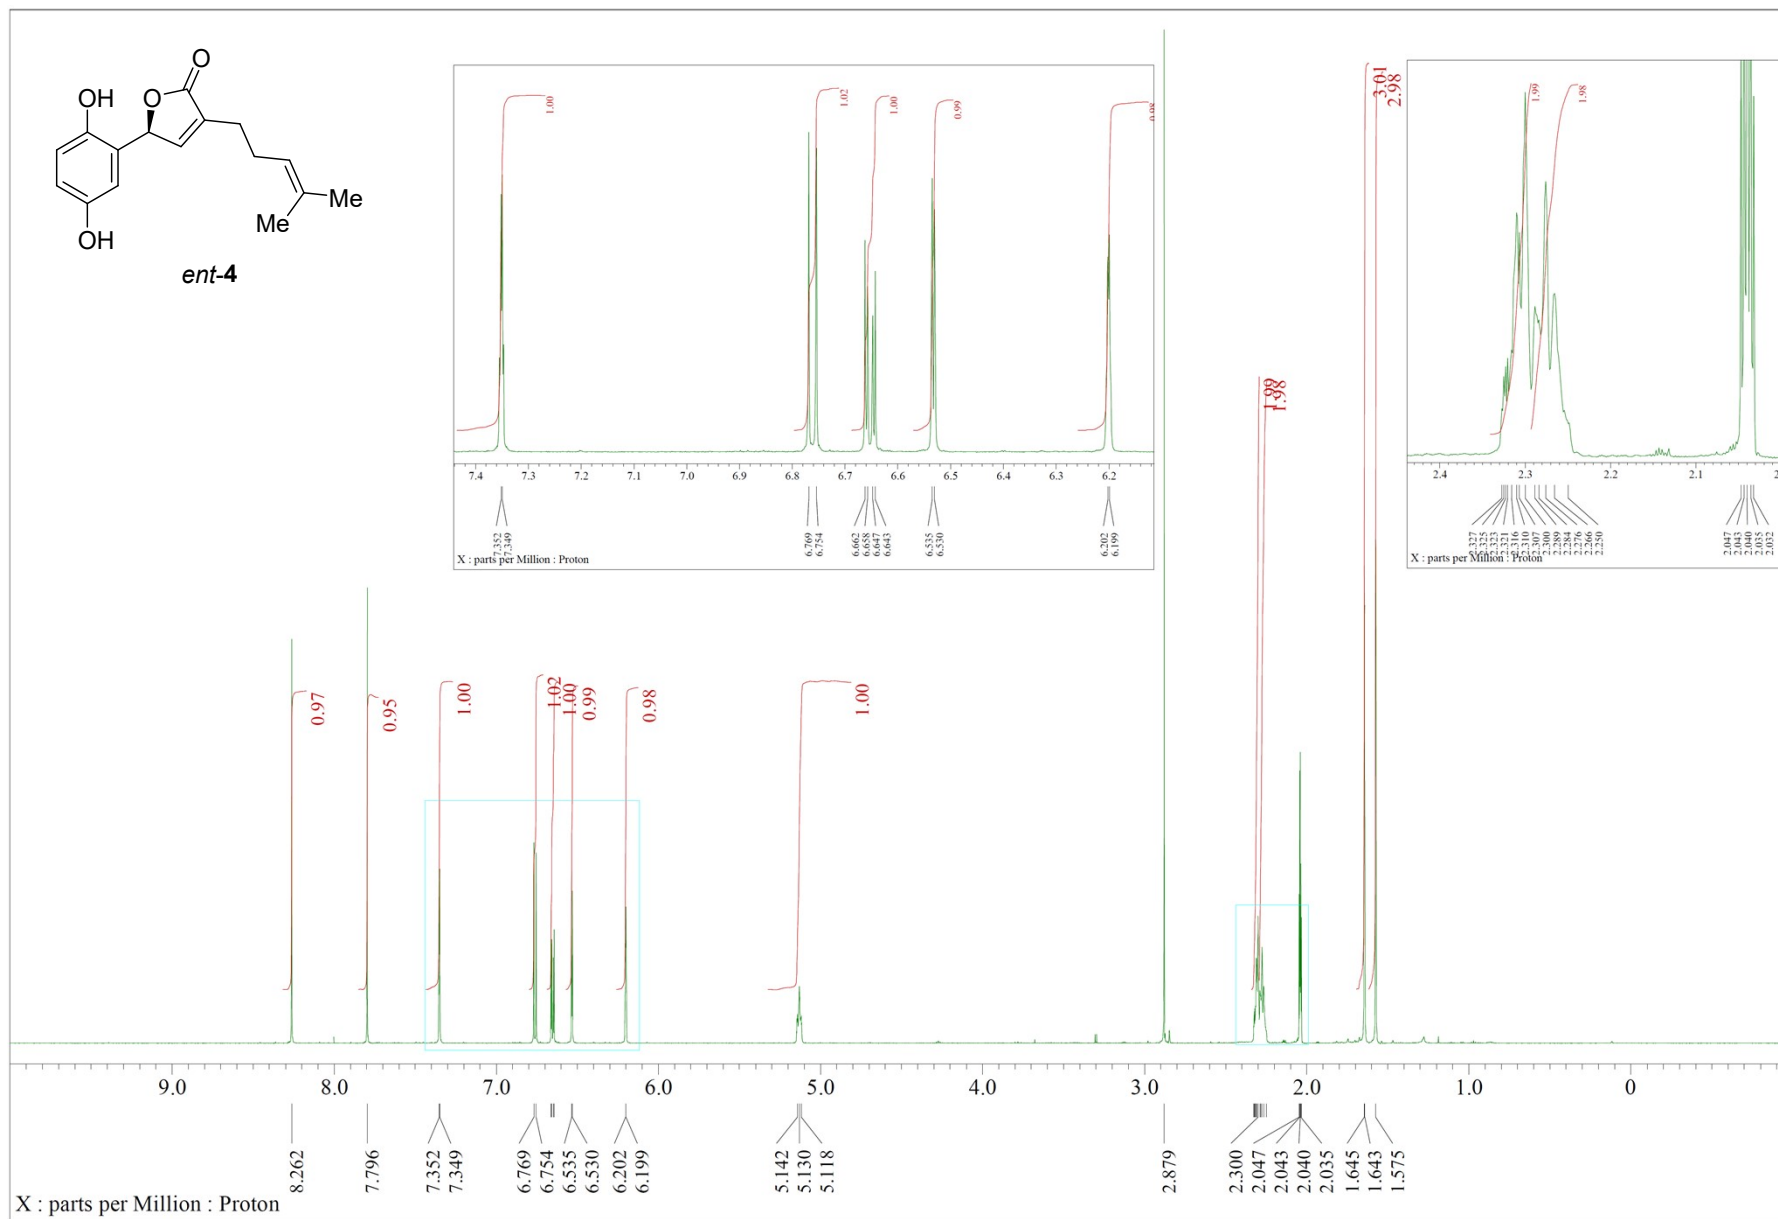

Figure S14.  $^{13}\text{C}$  NMR spectrum (150 MHz, acetone- $d_6$ ) of (-)-*ent*-formicin A (*ent*-4).

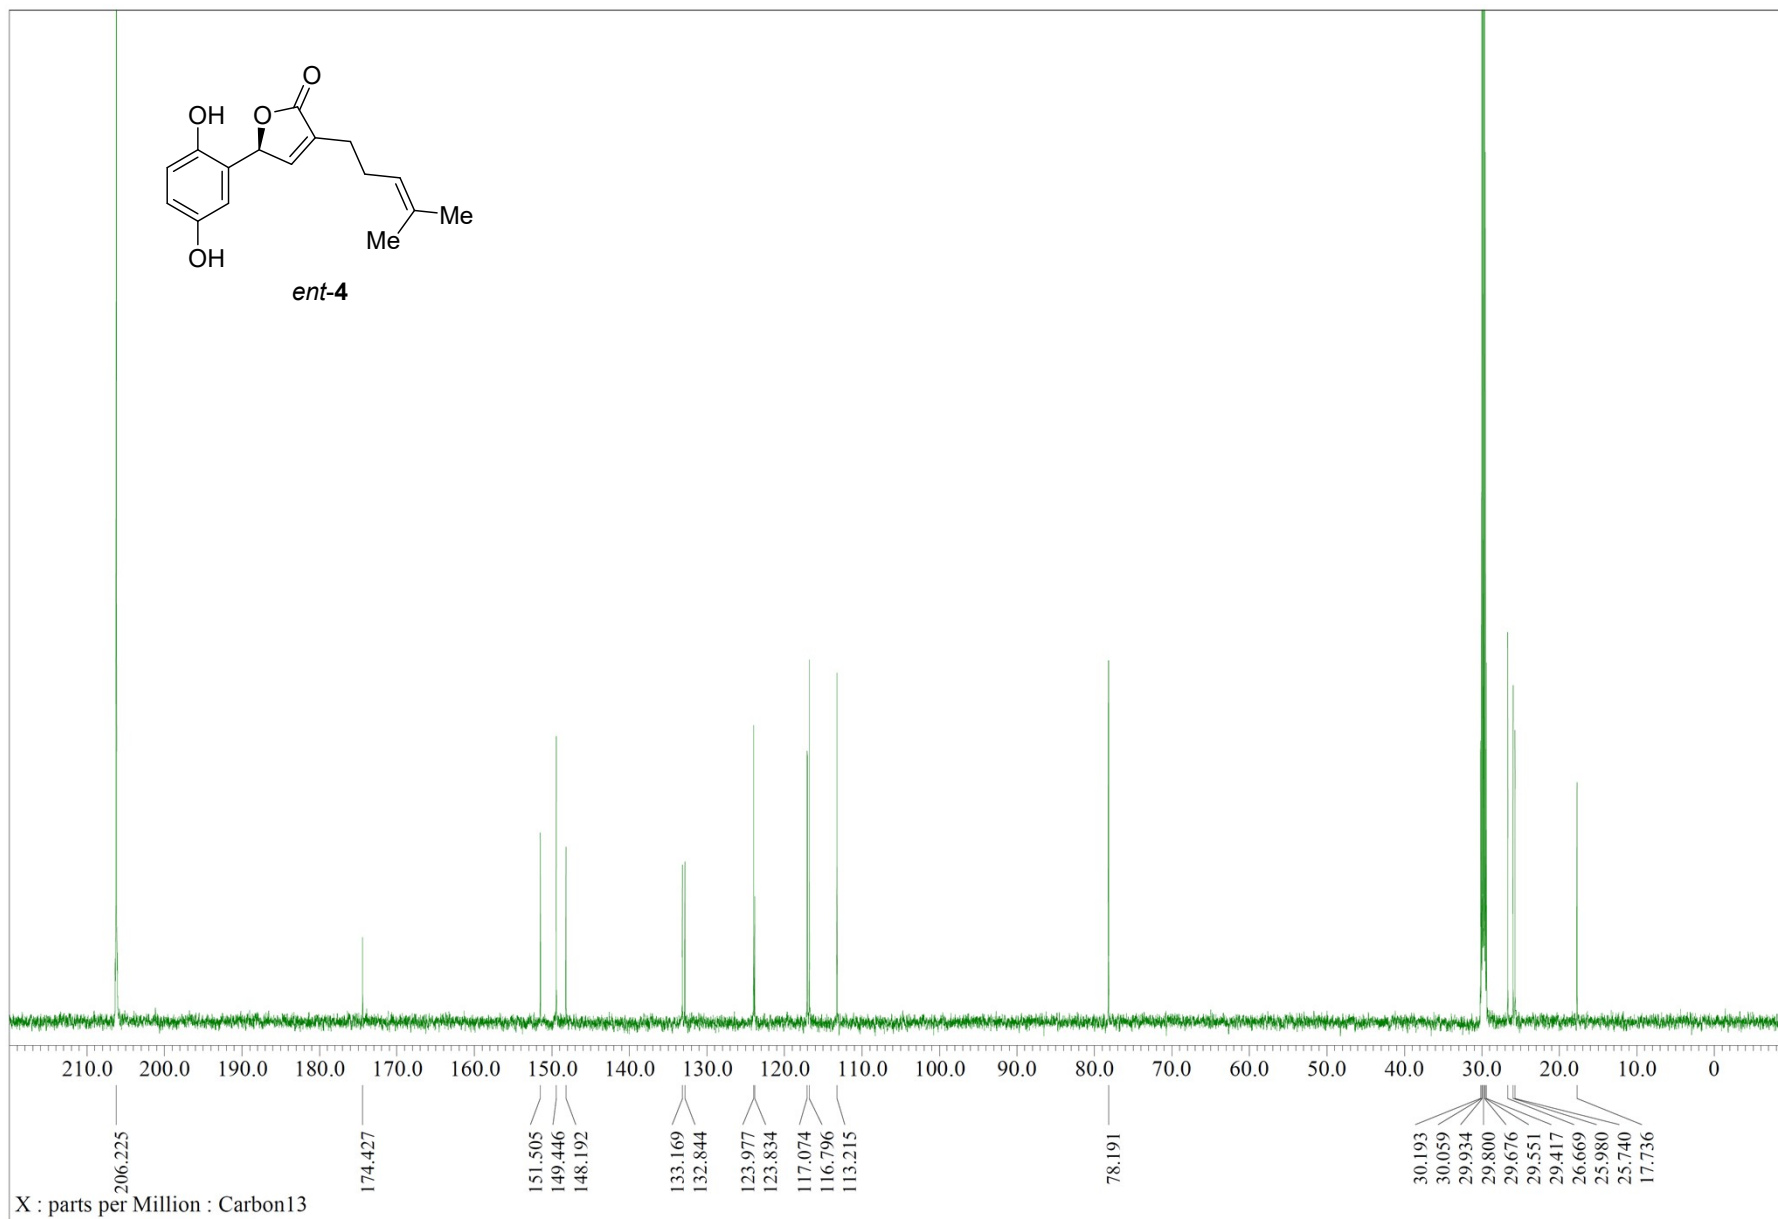

Figure S15. COSY spectrum of (-)-*ent*-fornicin A (*ent*-4).

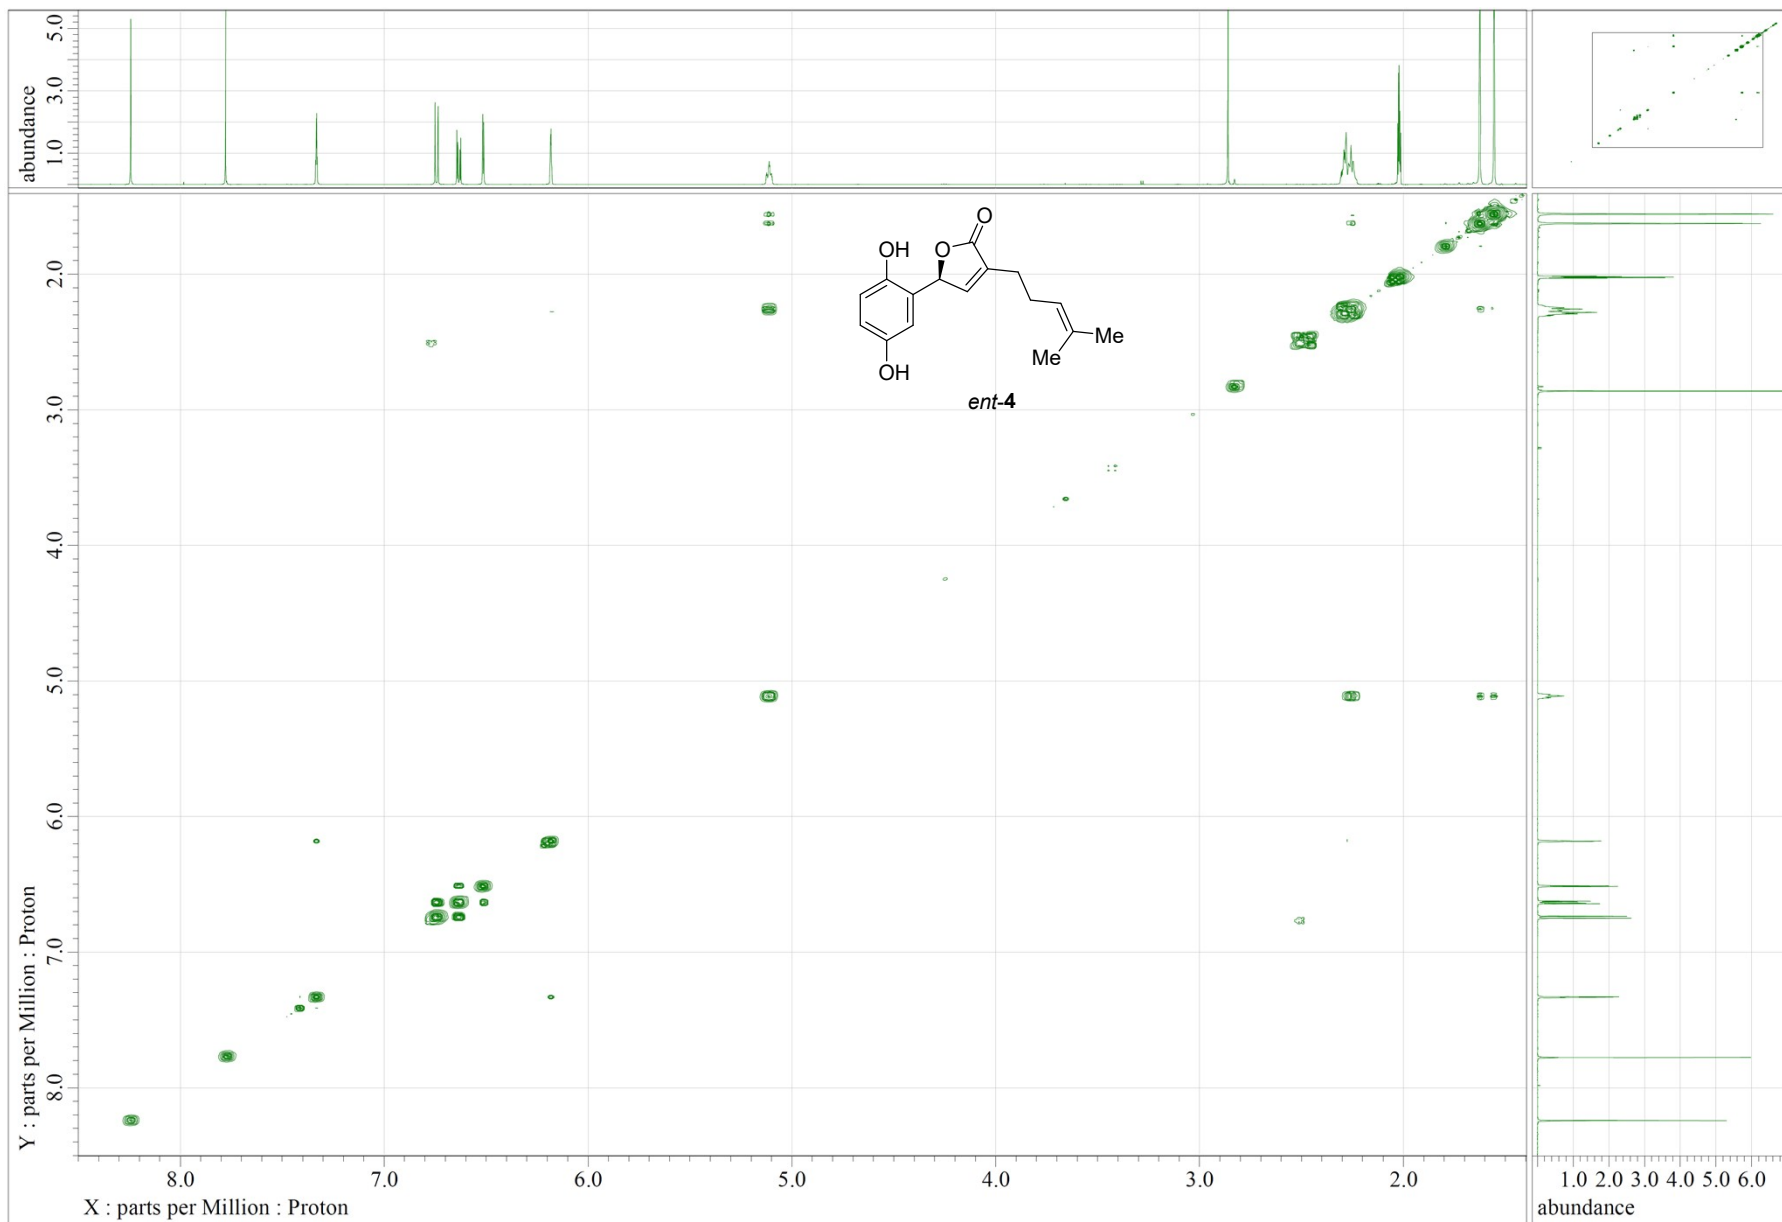

Figure S16. HMQC spectrum of (-)-*ent*-fornicin A (*ent*-4).

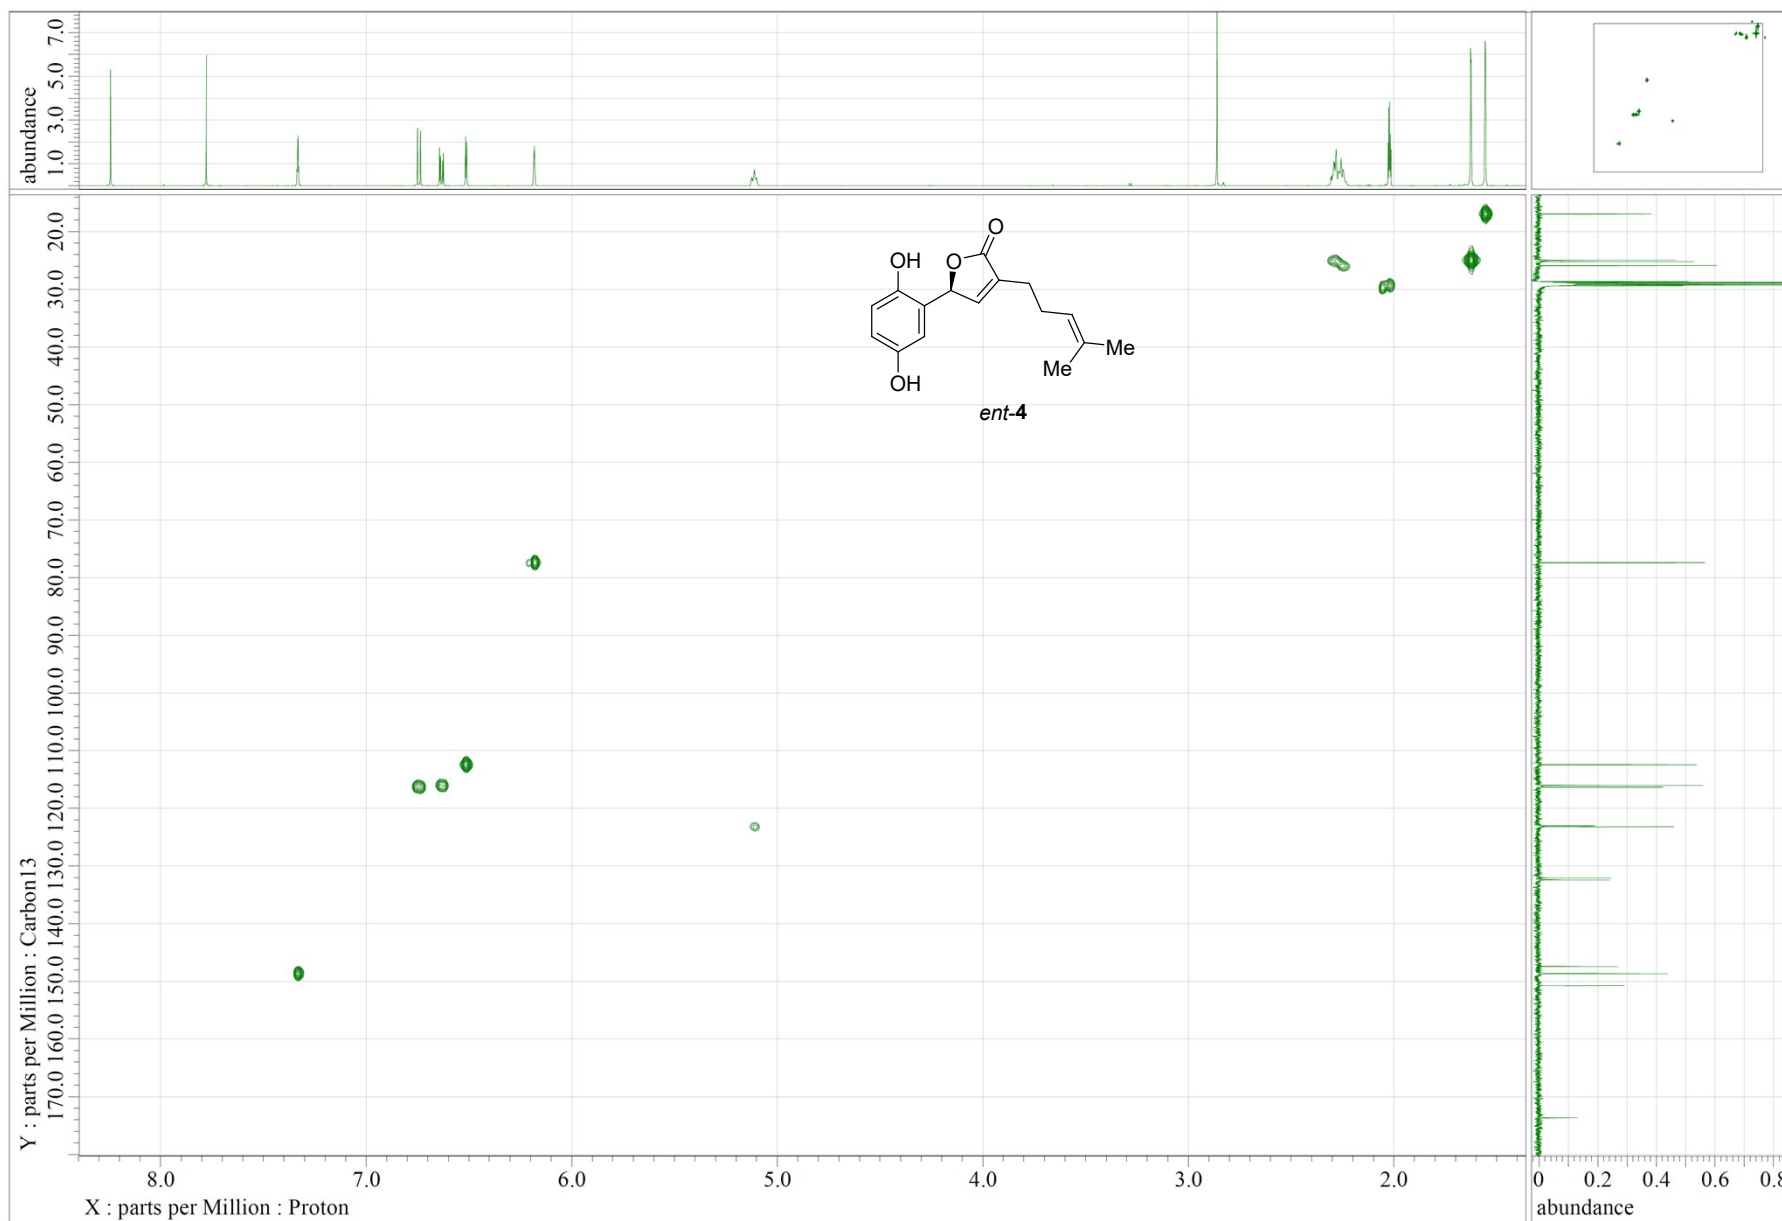



Figure S17. HMBC spectrum of (-)-*ent*-fornicin A (*ent*-4).

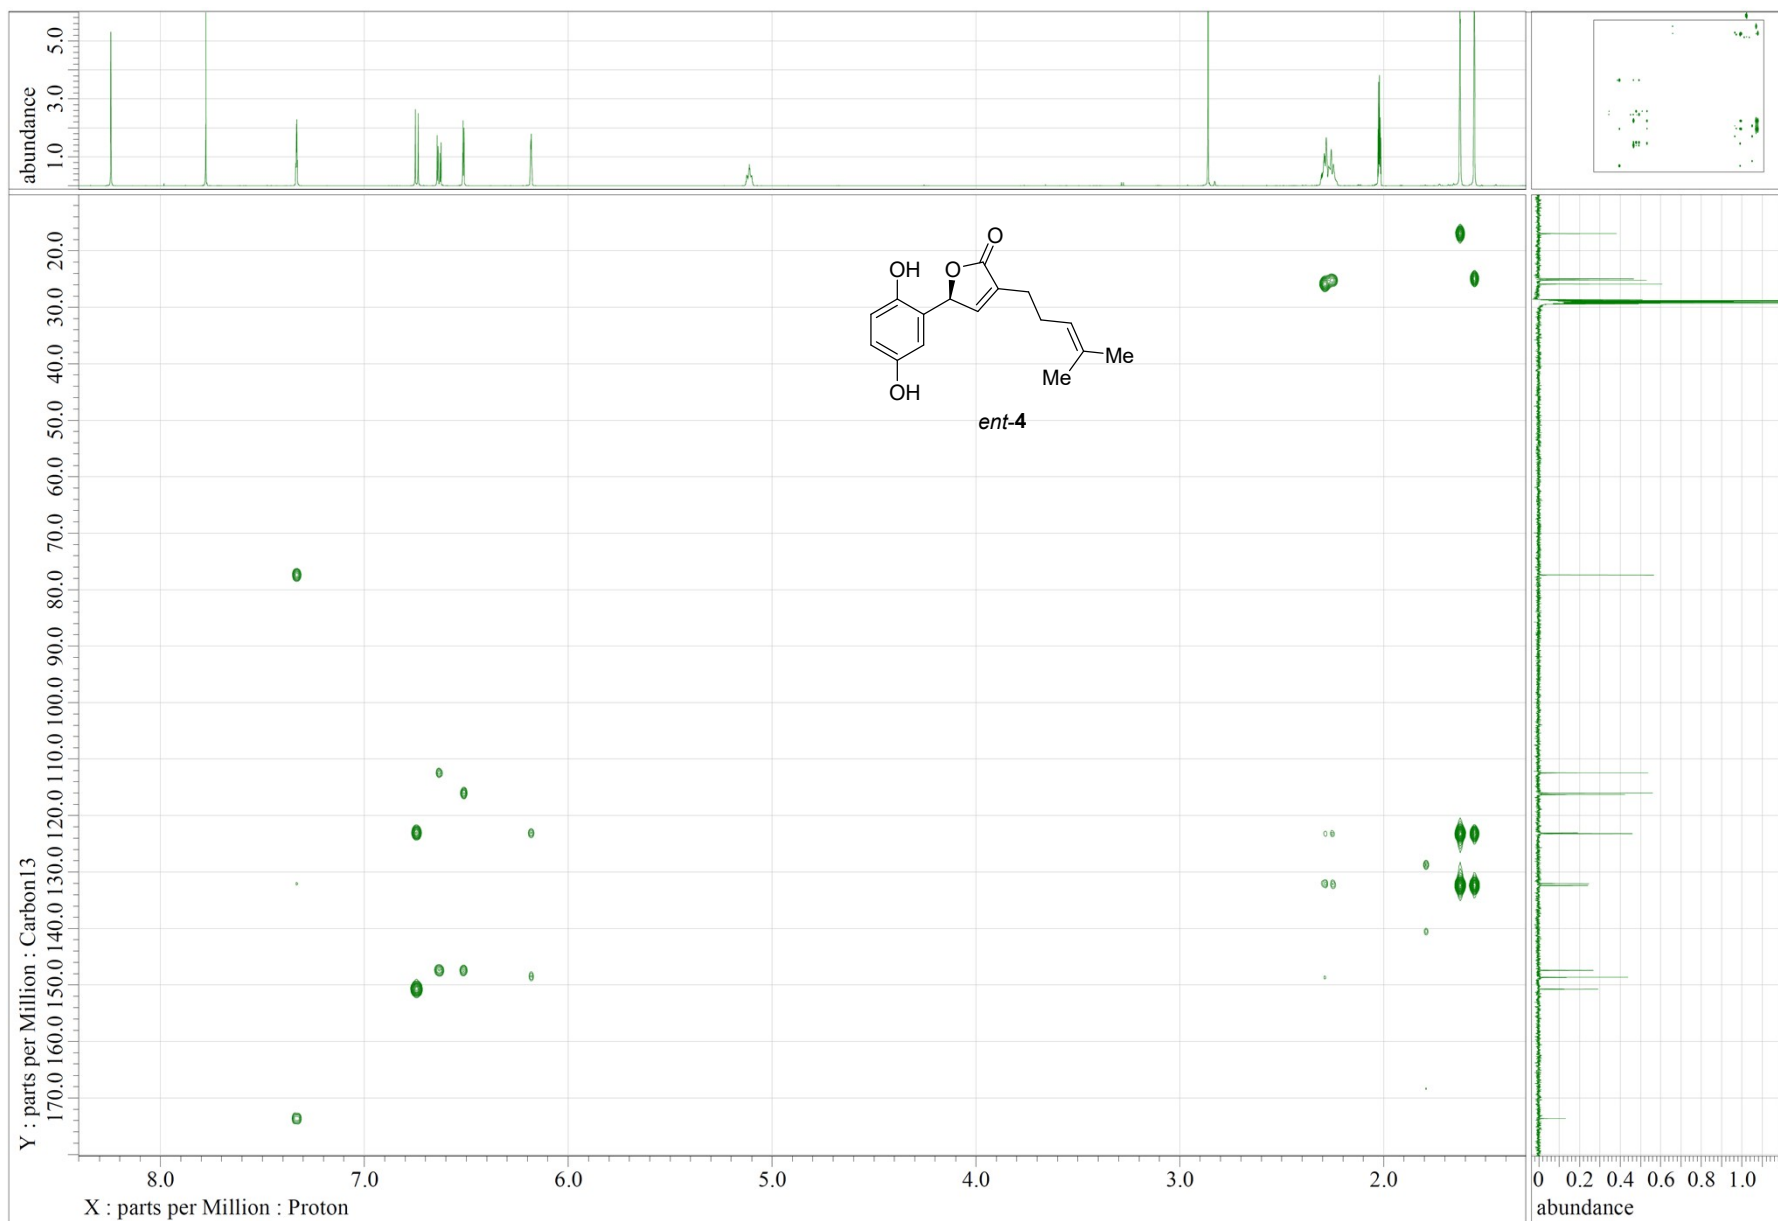

Figure S18  $^1\text{H}$  NMR spectrum (600 MHz,  $\text{CDCl}_3$ ) of compound 9.

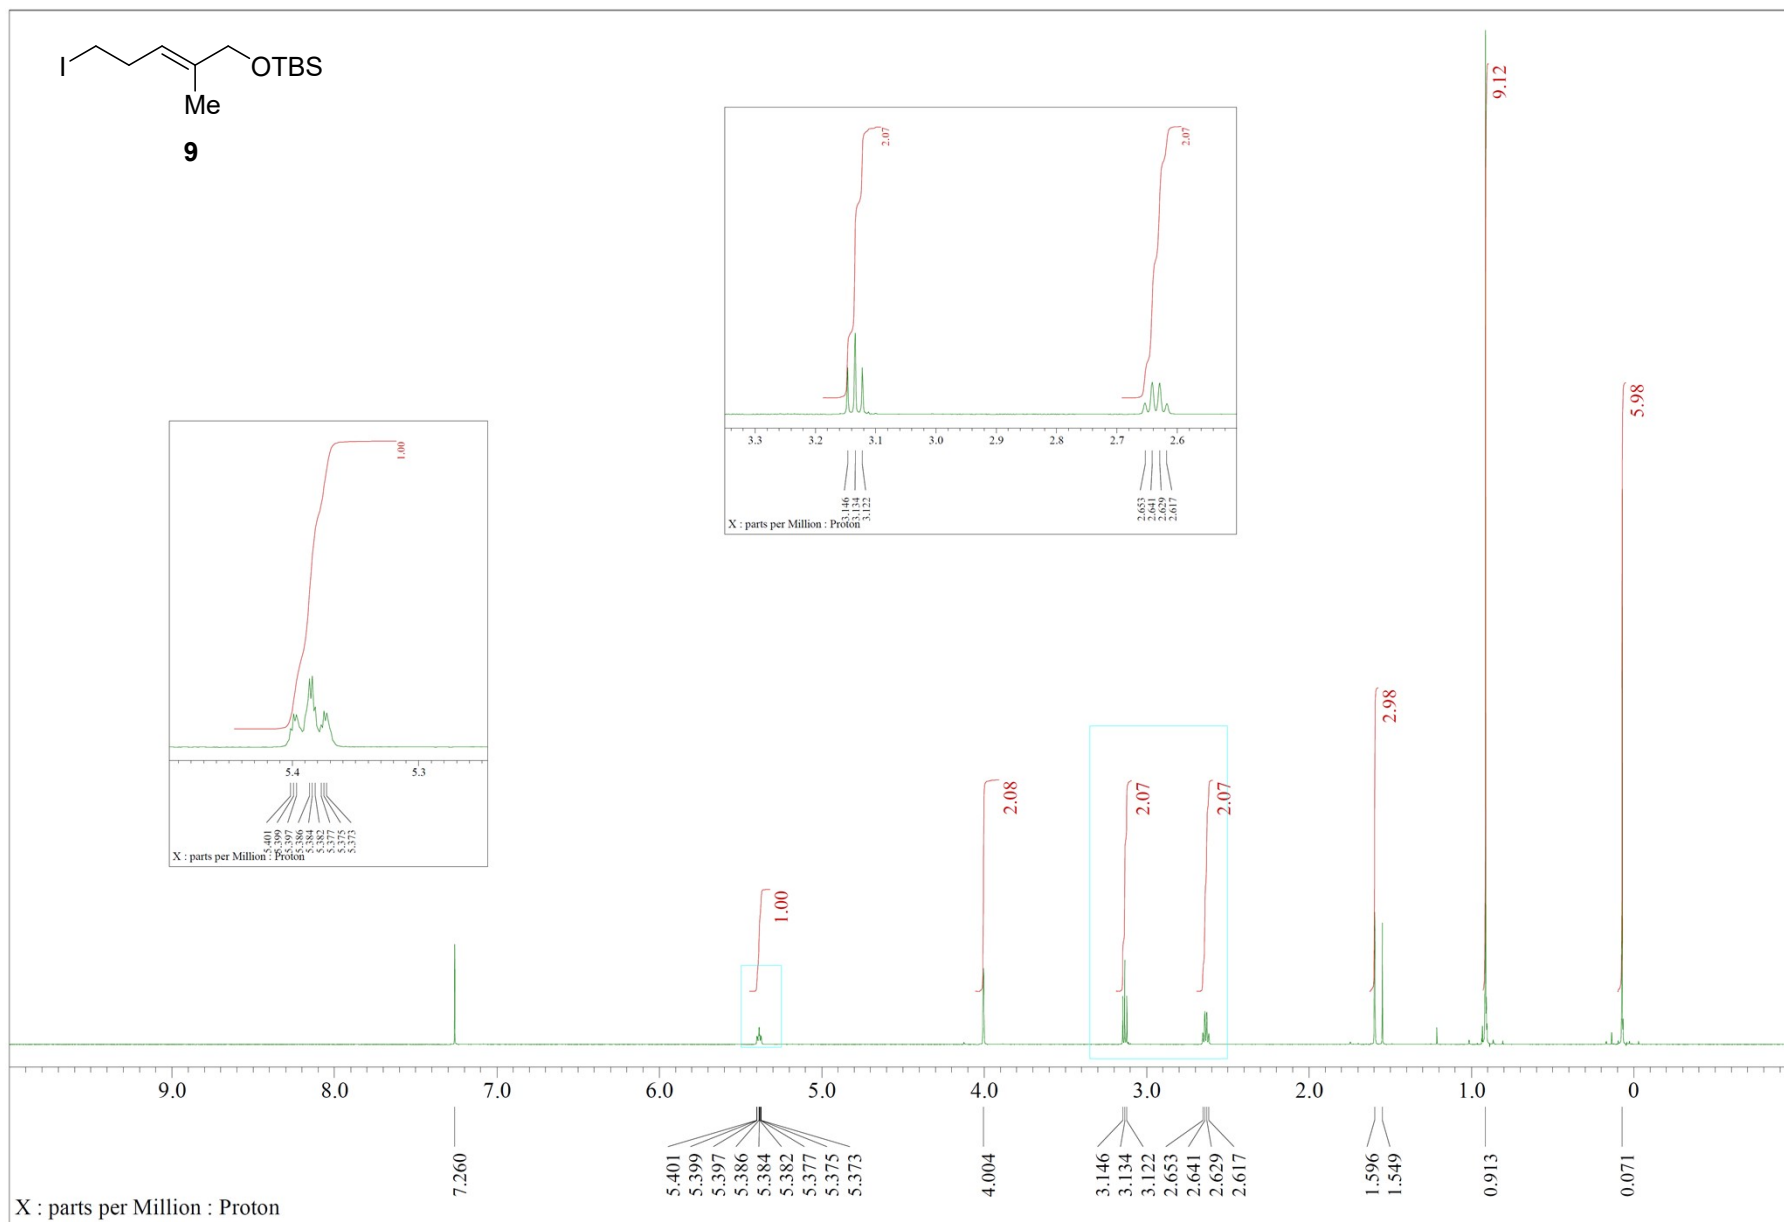

Figure S19.  $^{13}\text{C}$  NMR spectrum (150 MHz,  $\text{CDCl}_3$ ) of compound 9.

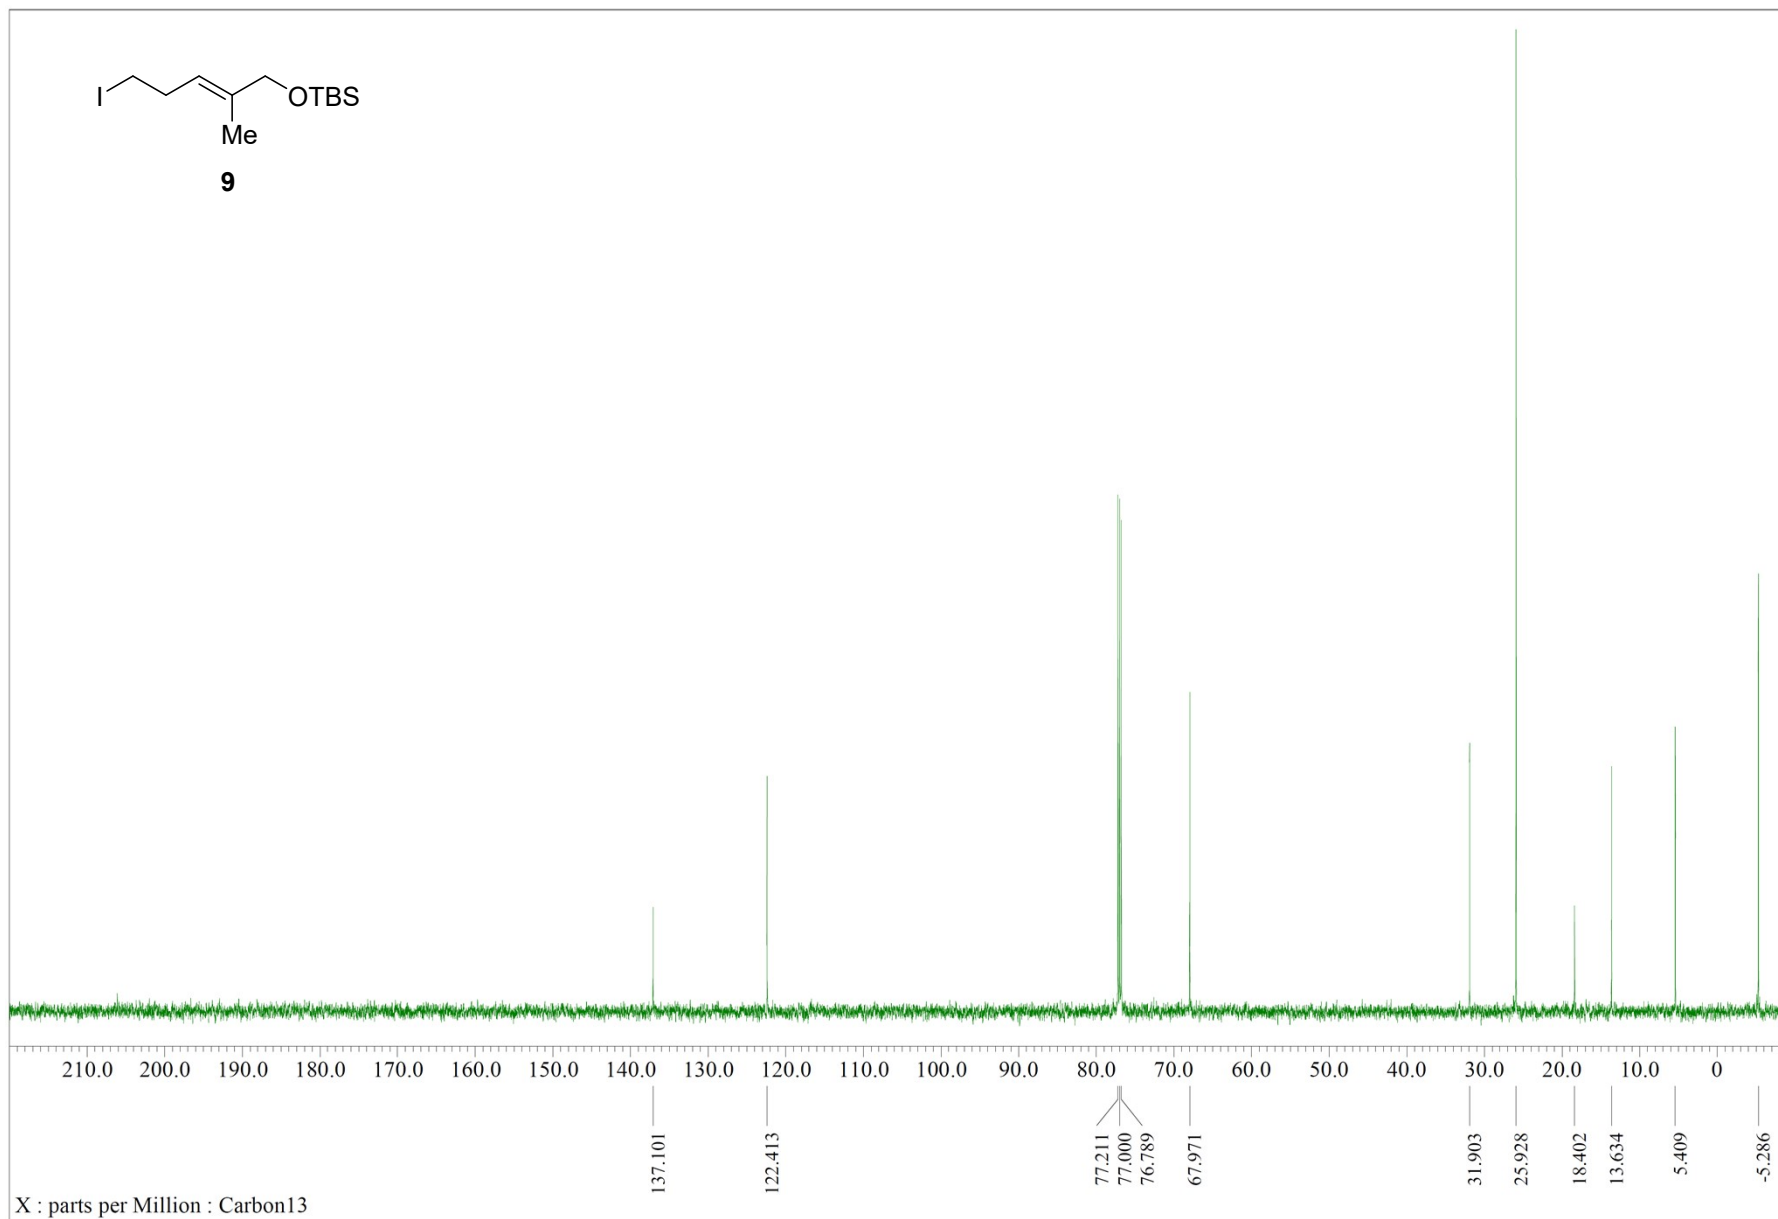

Figure S20. <sup>1</sup>H NMR spectrum (600 MHz, CDCl<sub>3</sub>, dr = 5:1) of compound 7.

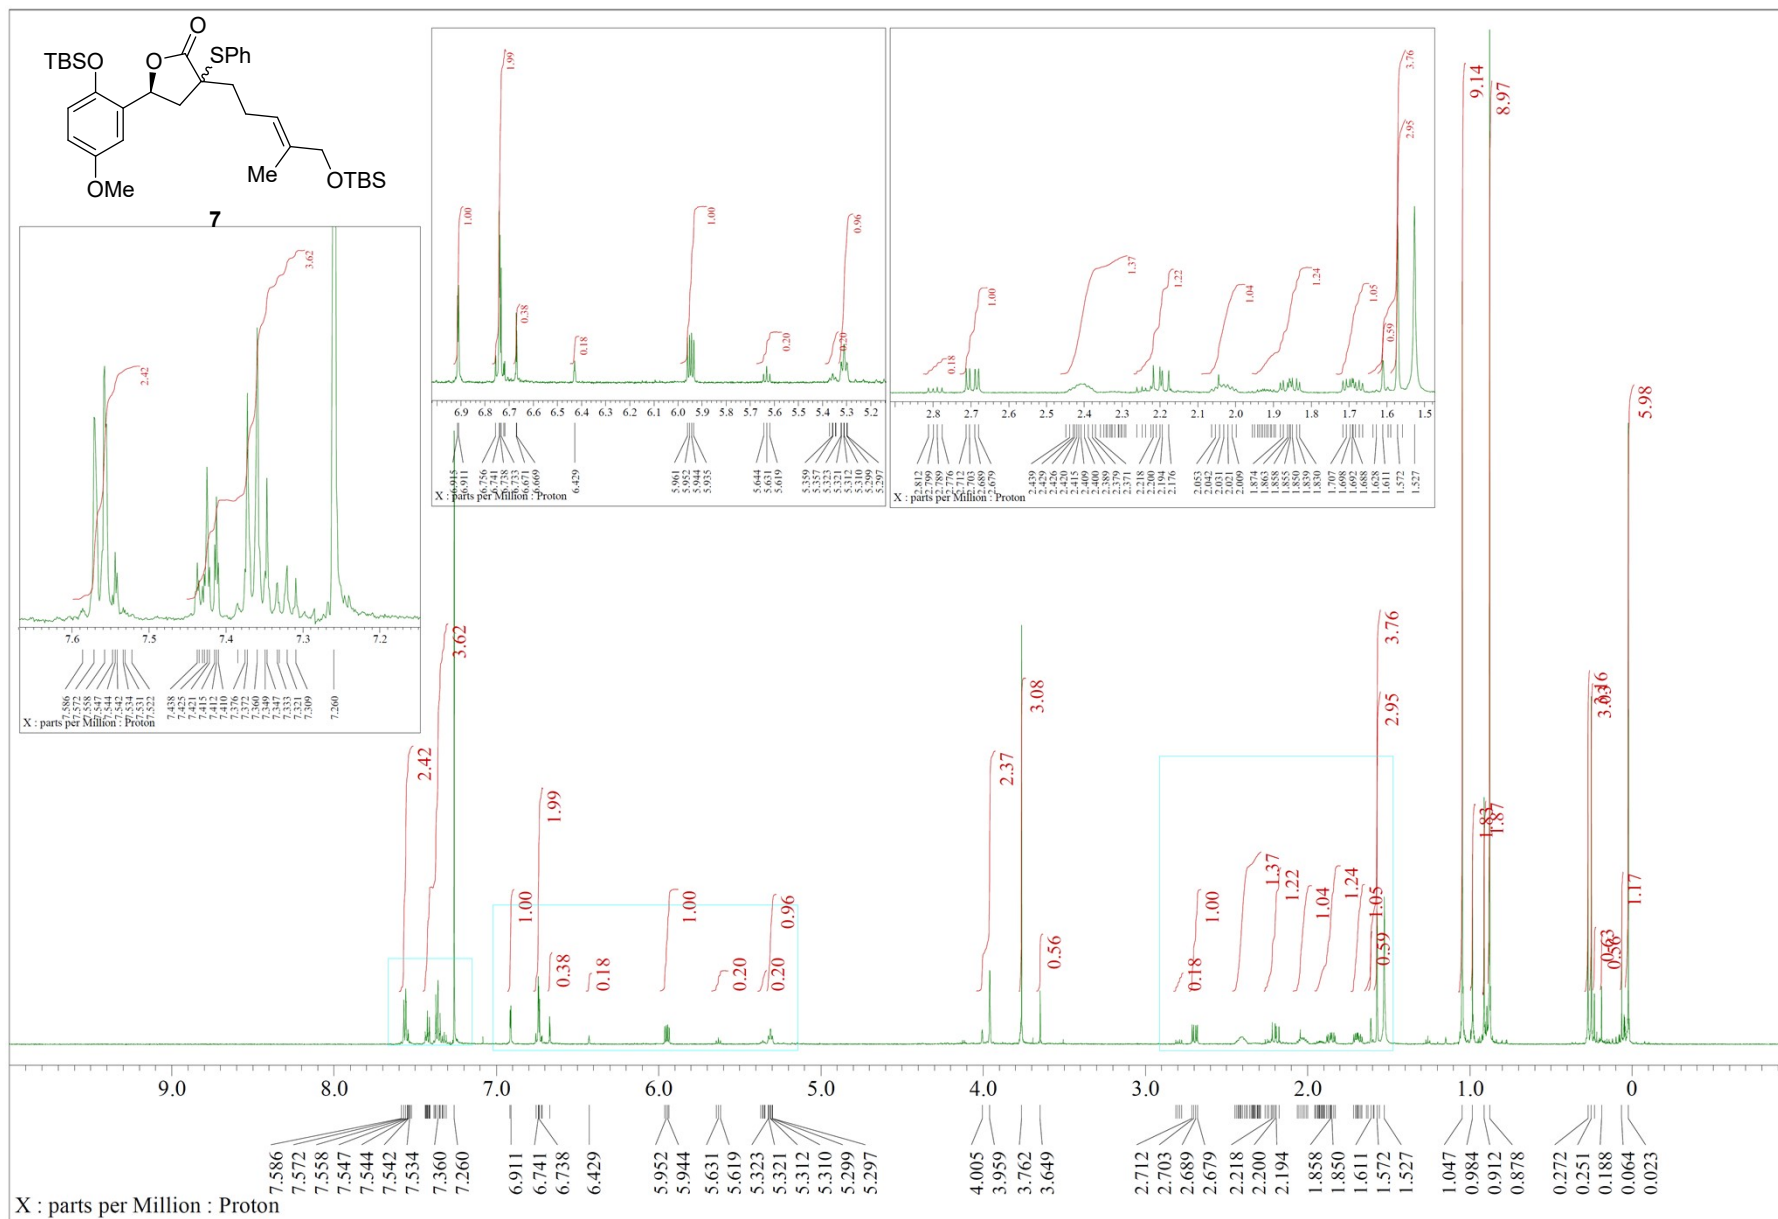

Figure S21.  $^{13}\text{C}$  NMR spectrum (150 MHz,  $\text{CDCl}_3$ , dr = 5:1) of compound 7.

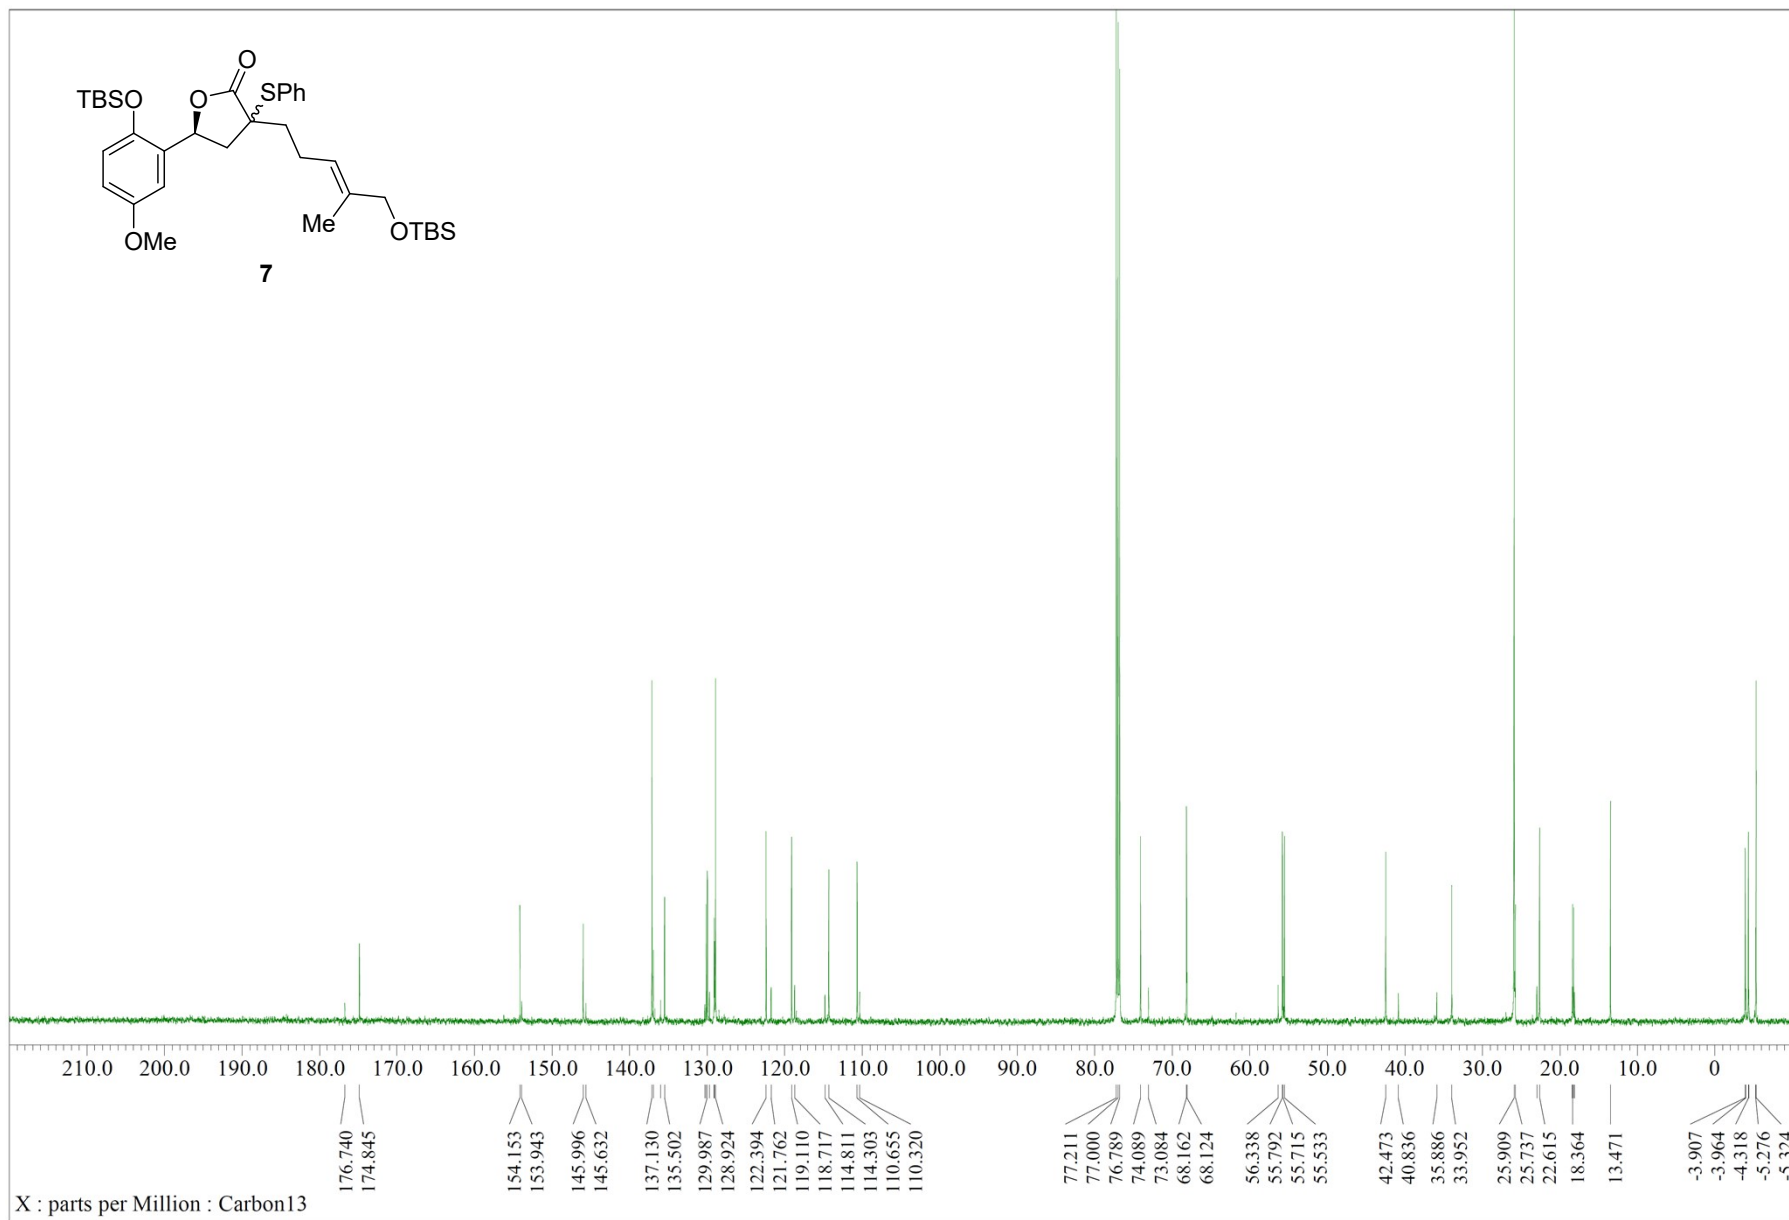

Figure S22. <sup>1</sup>H NMR spectrum (600 MHz, CDCl<sub>3</sub>) of compound 5.

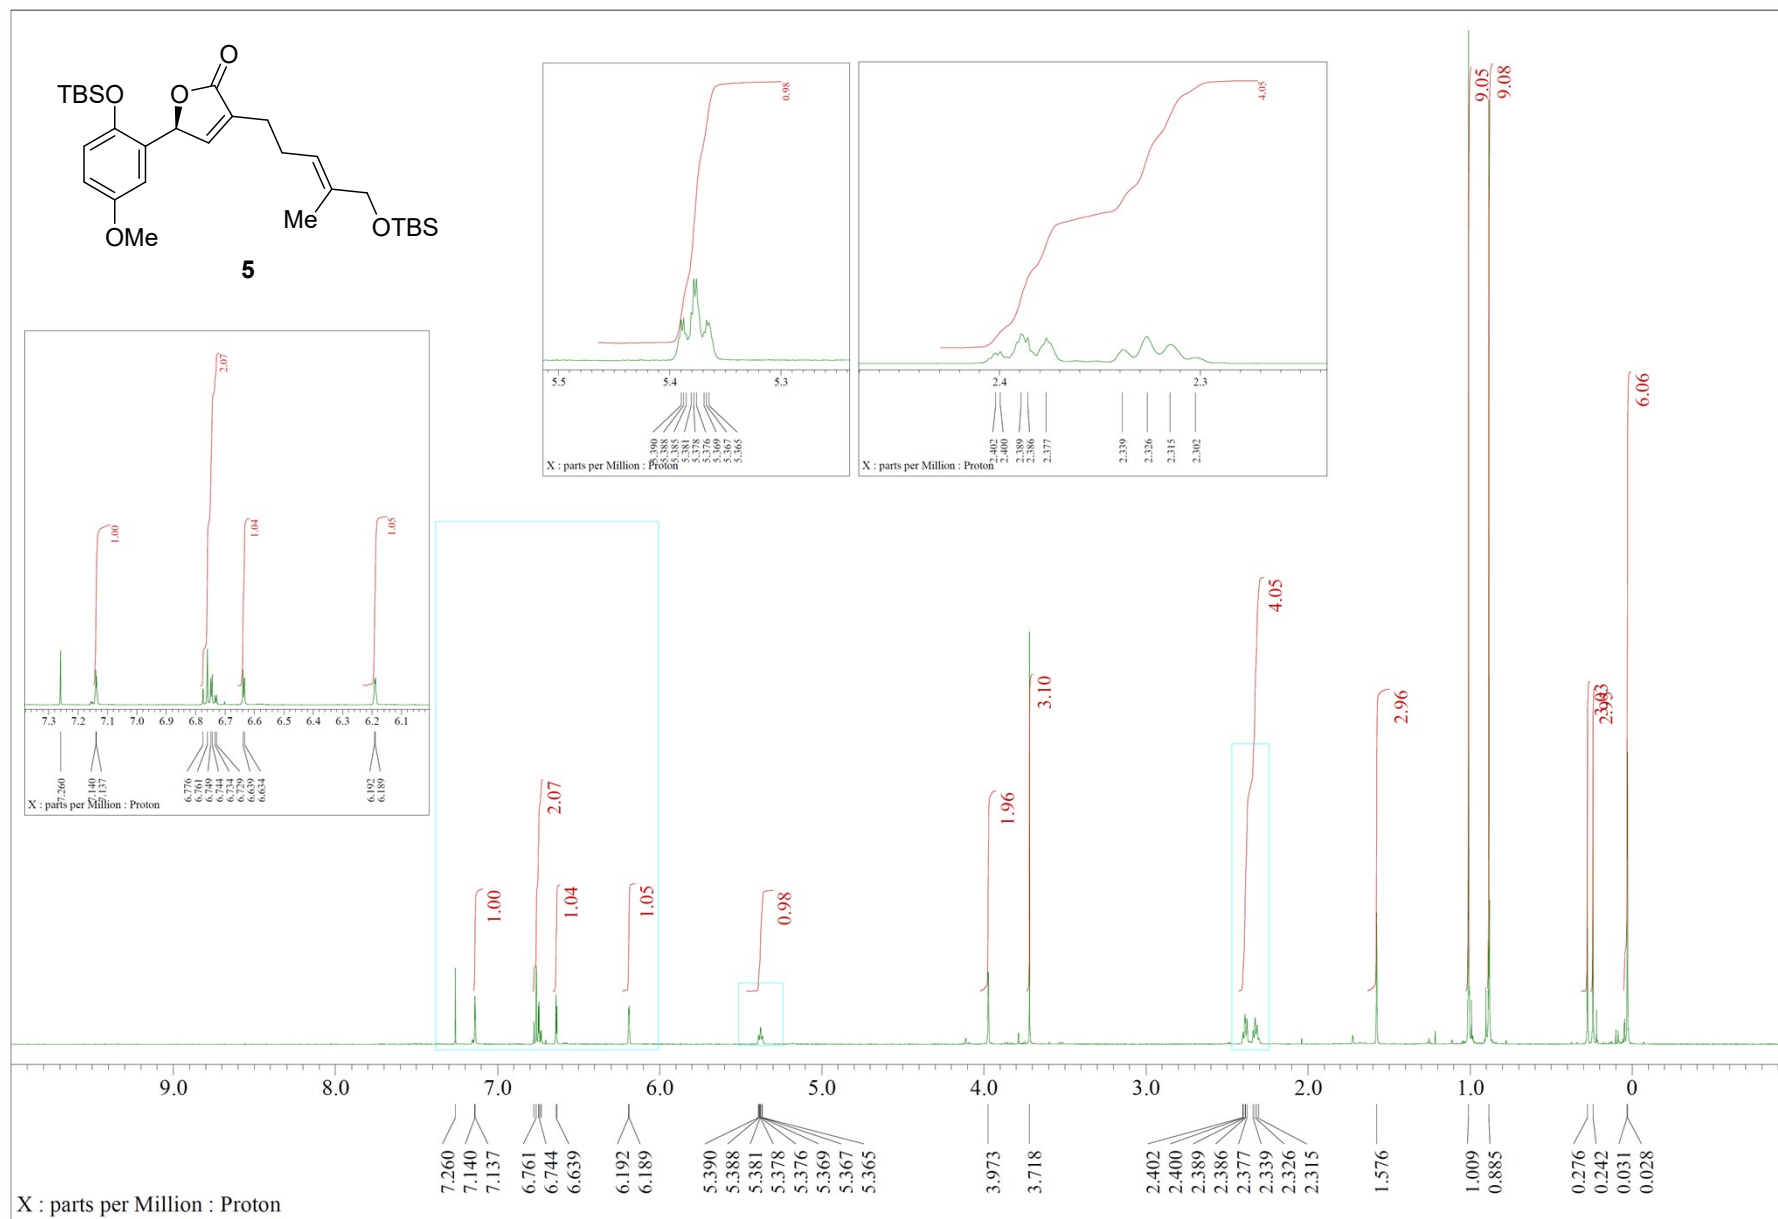

Figure S23.  $^{13}\text{C}$  NMR spectrum (150 MHz,  $\text{CDCl}_3$ ) of compound 5.

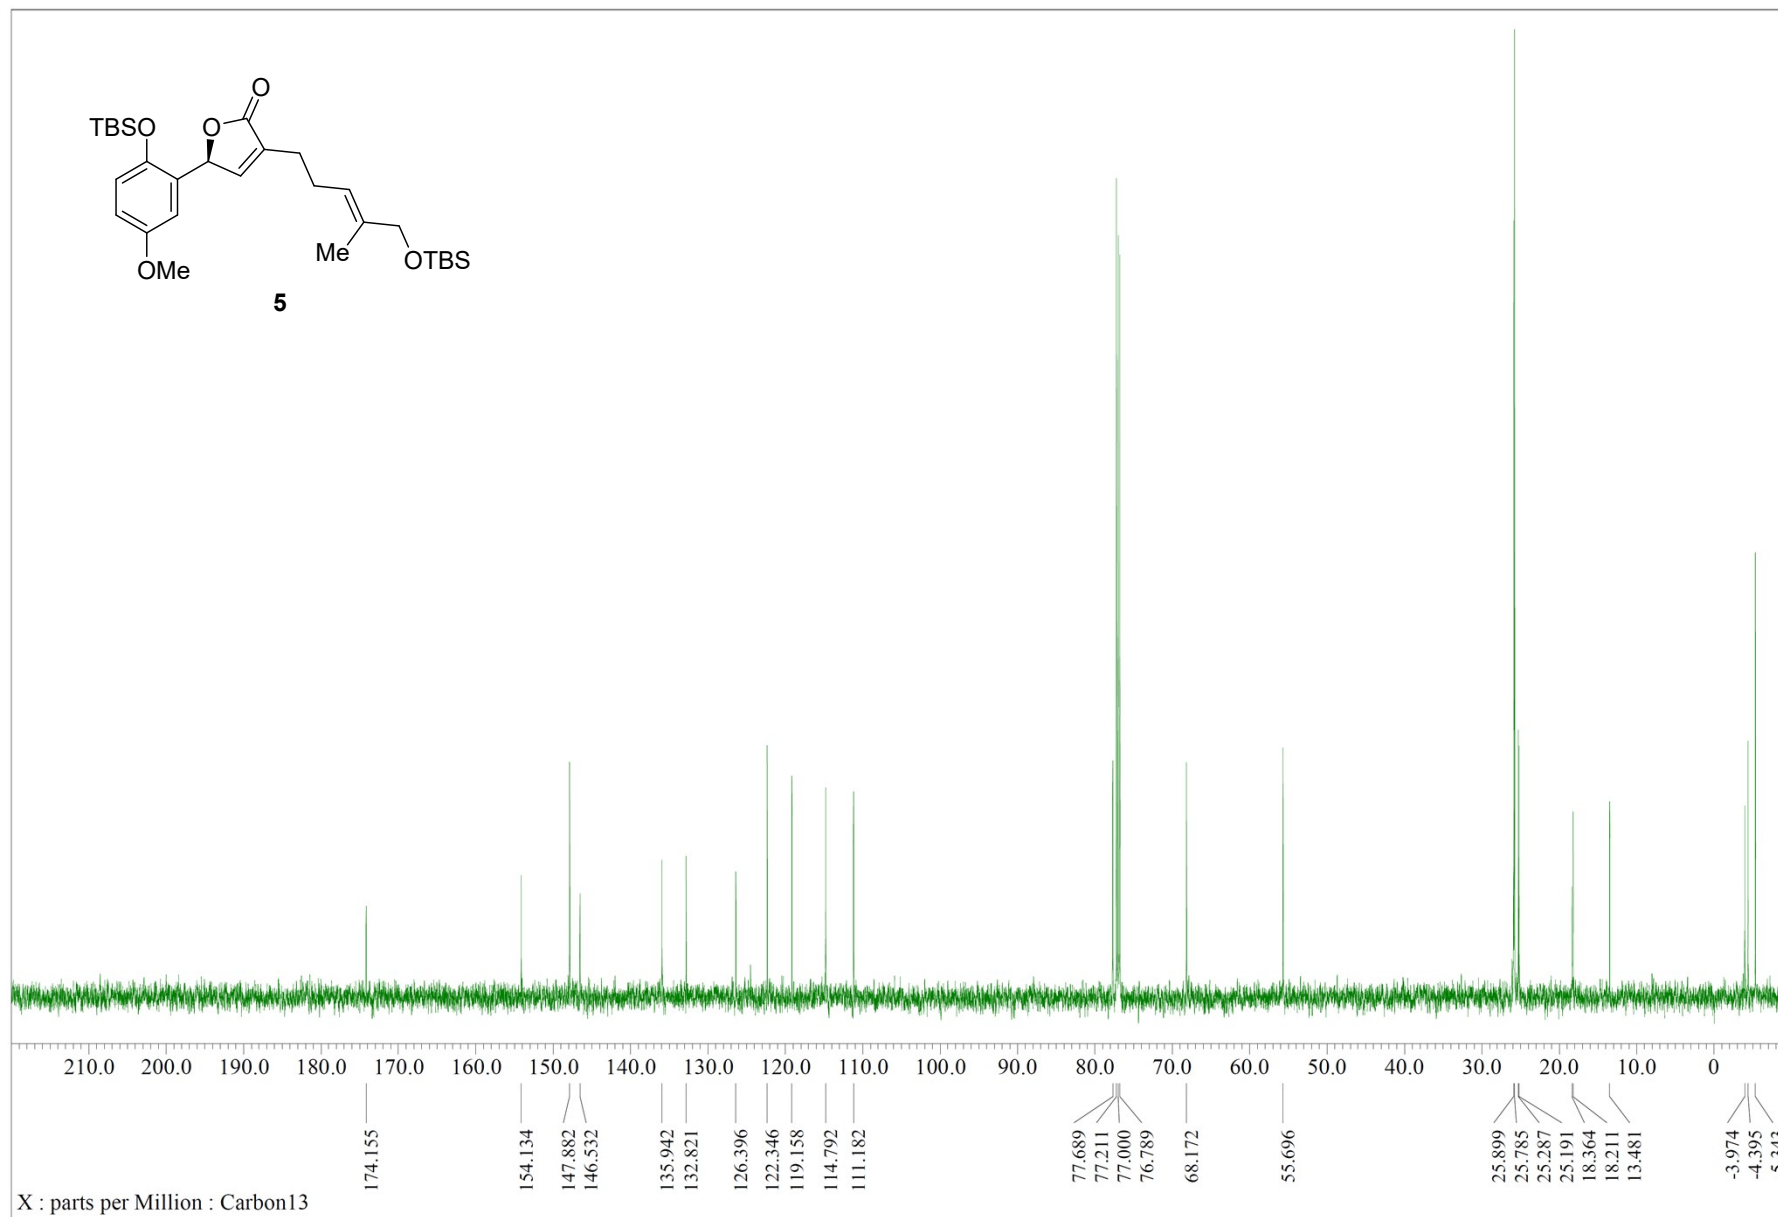

Figure S24. <sup>1</sup>H NMR spectrum (600 MHz, CD<sub>3</sub>OD) of compound 15.

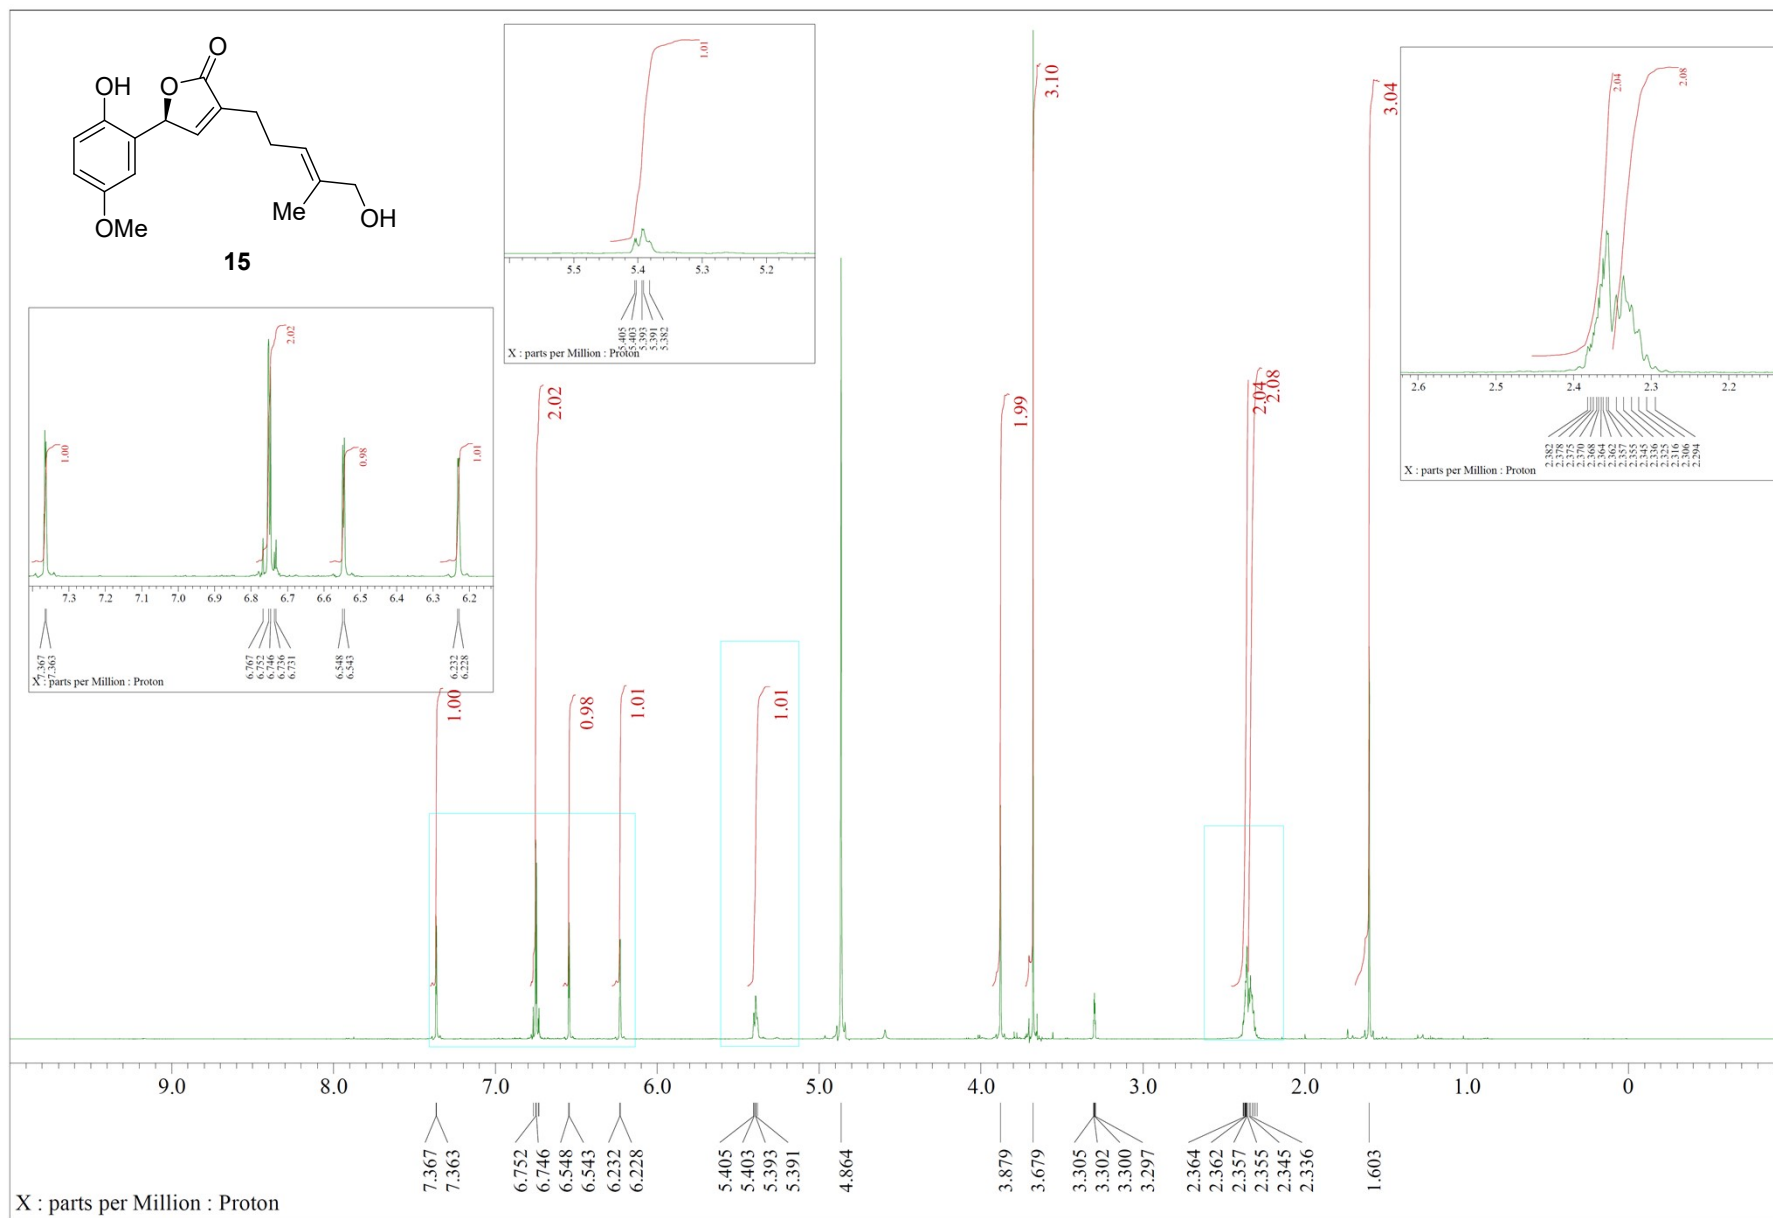



Figure S25.  $^{13}\text{C}$  NMR spectrum (150 MHz,  $\text{CDCl}_3$ ) of compound 15.

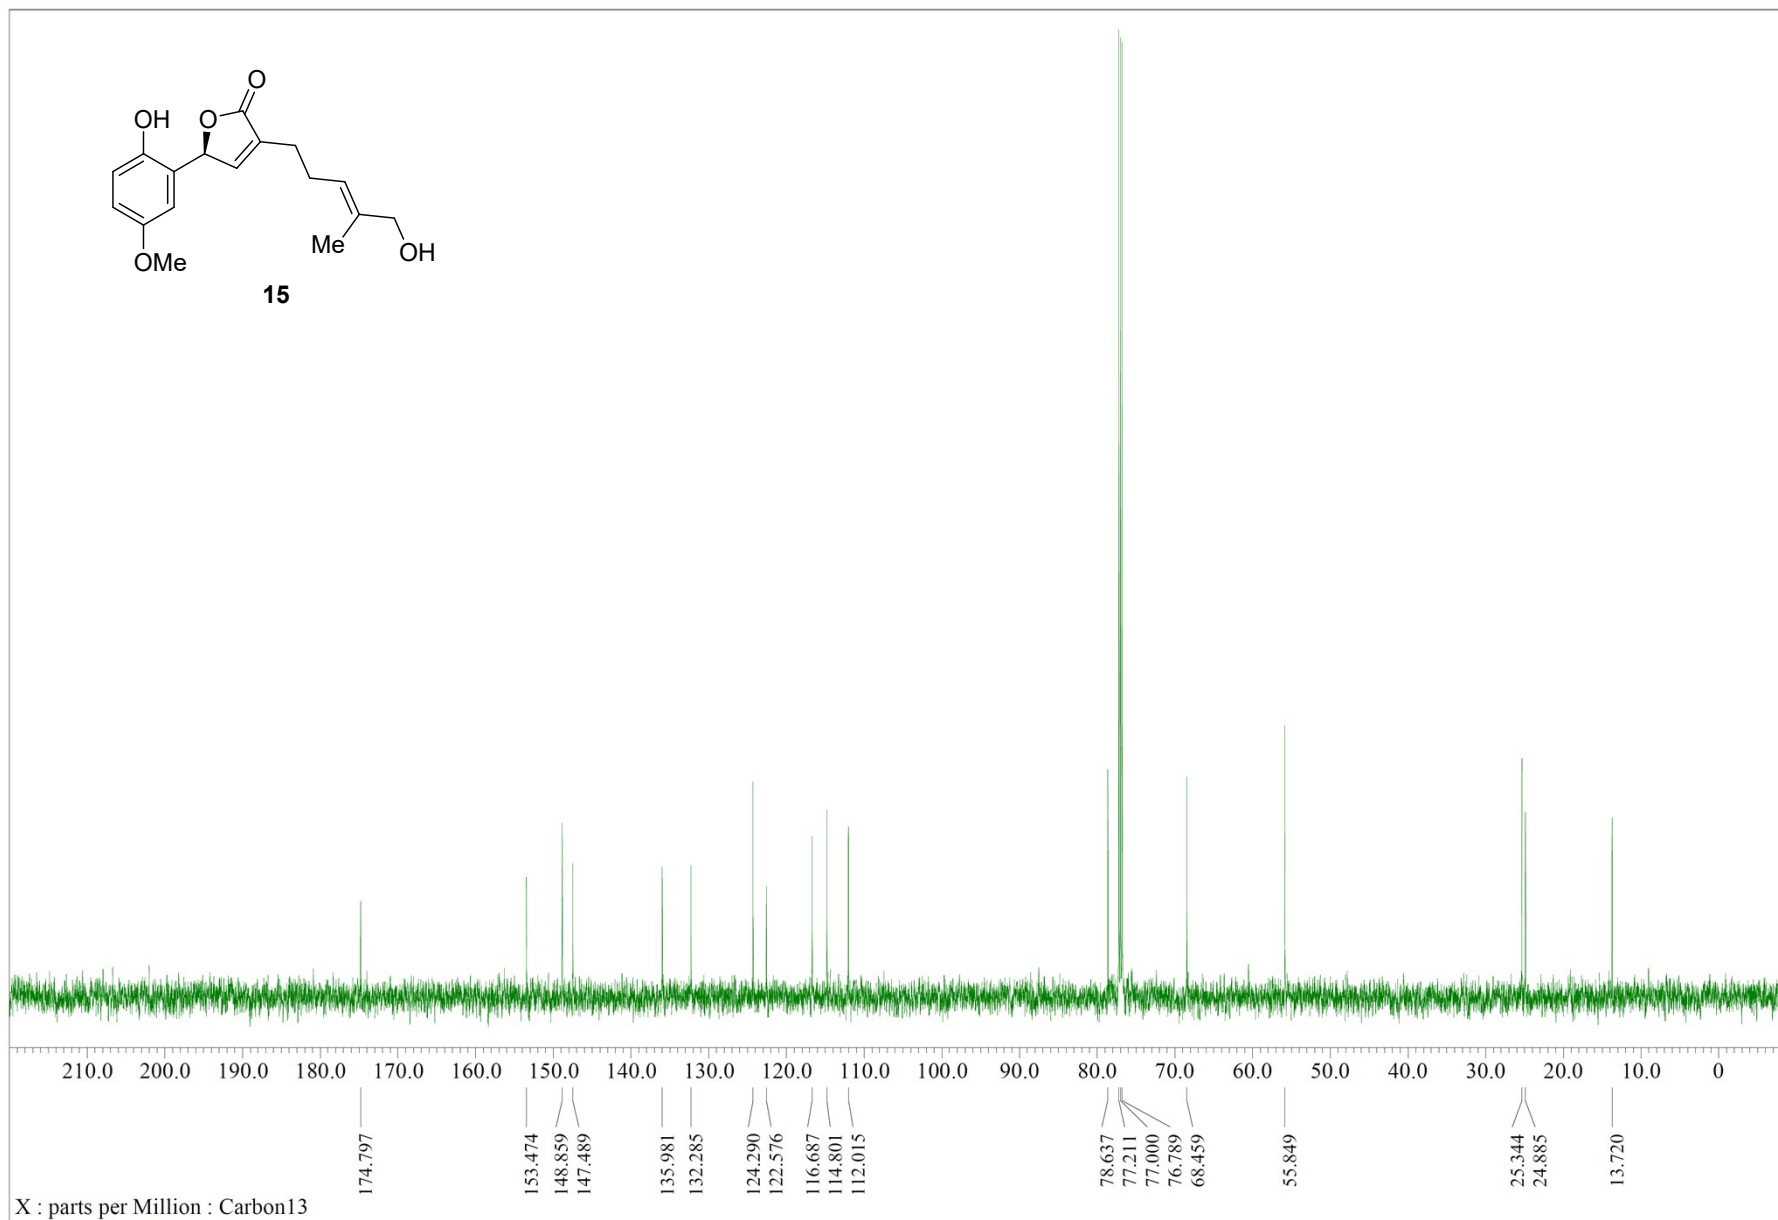

Figure S26. <sup>1</sup>H NMR spectrum (600 MHz, CD<sub>3</sub>OD) of (-)-applanatumol U (3).

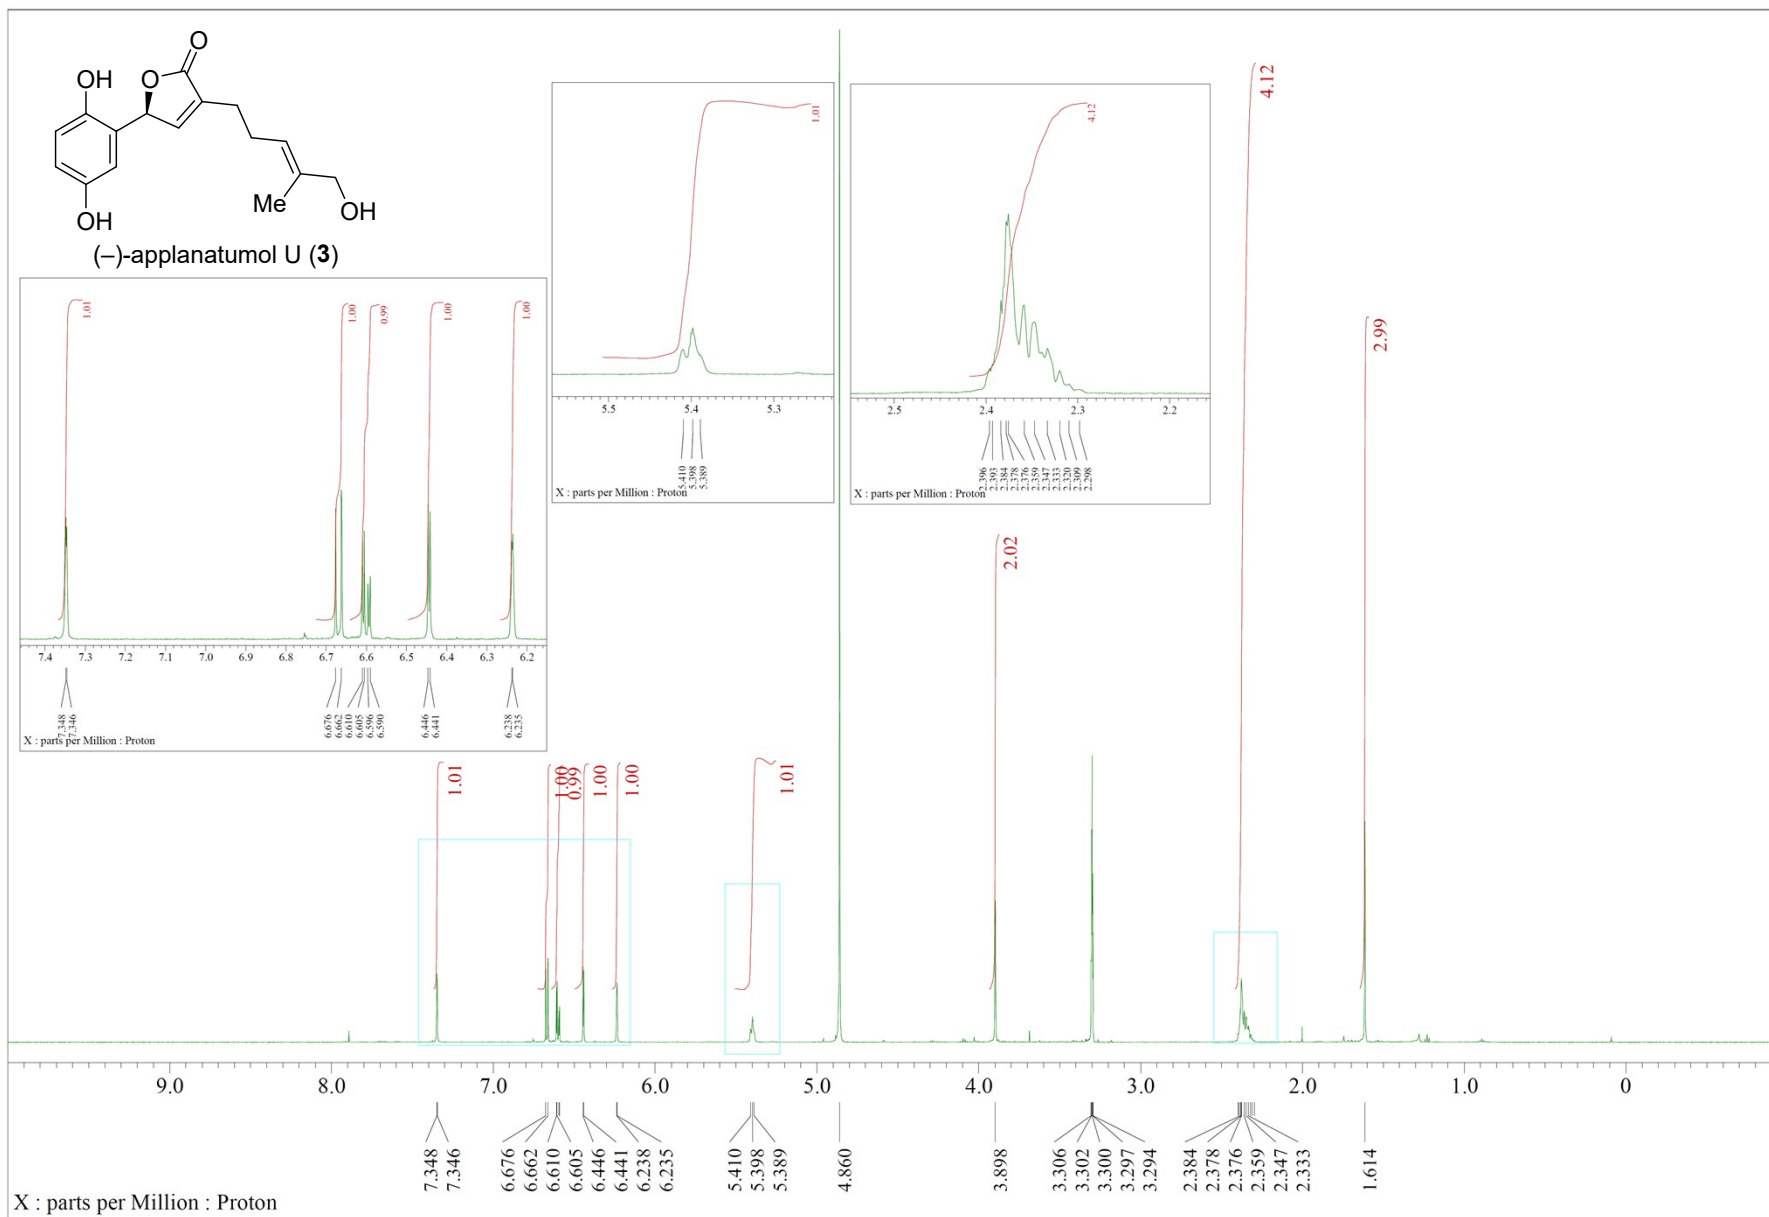

Figure S27.  $^{13}\text{C}$  NMR spectrum (150 MHz,  $\text{CD}_3\text{OD}$ ) of (-)-aplanatumol U (3).

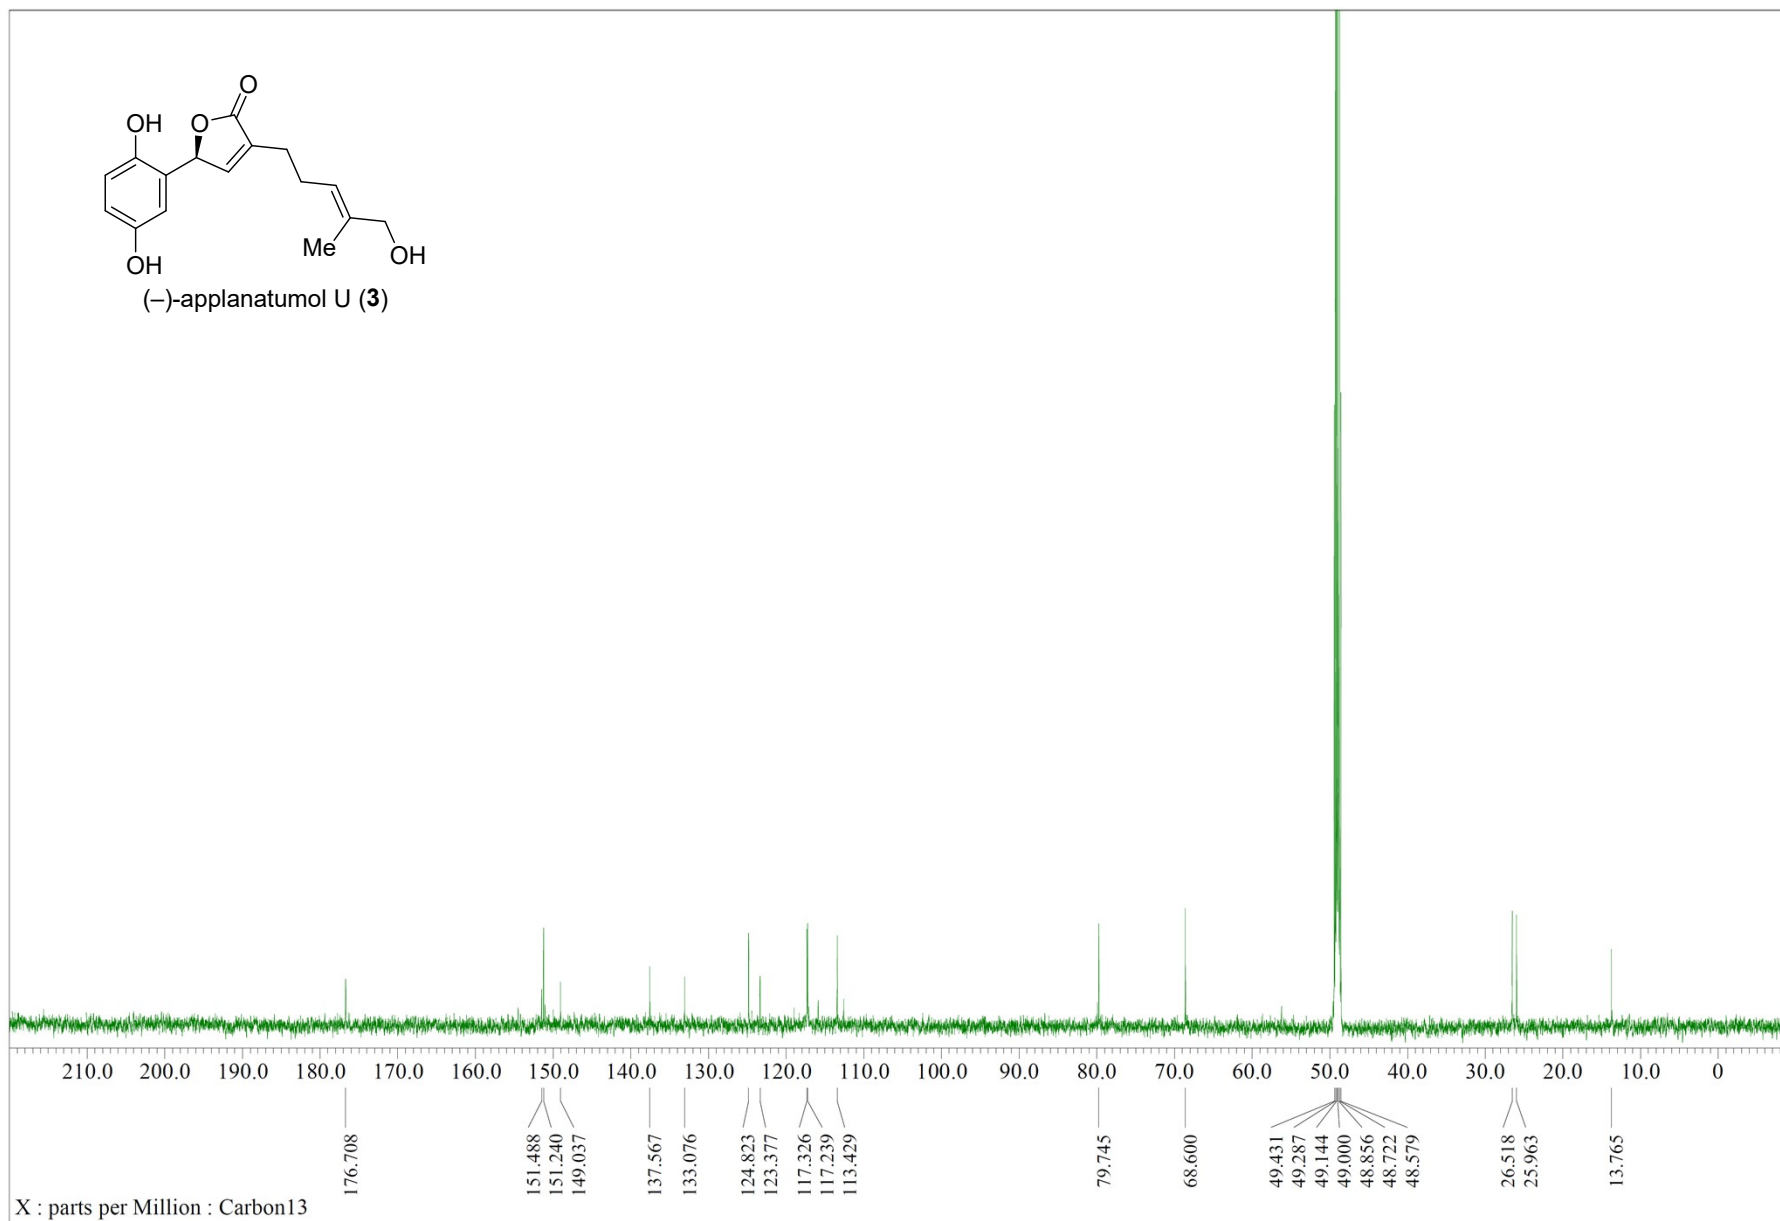

Figure S28. COSY spectrum of (-)-applanatumol U (3).

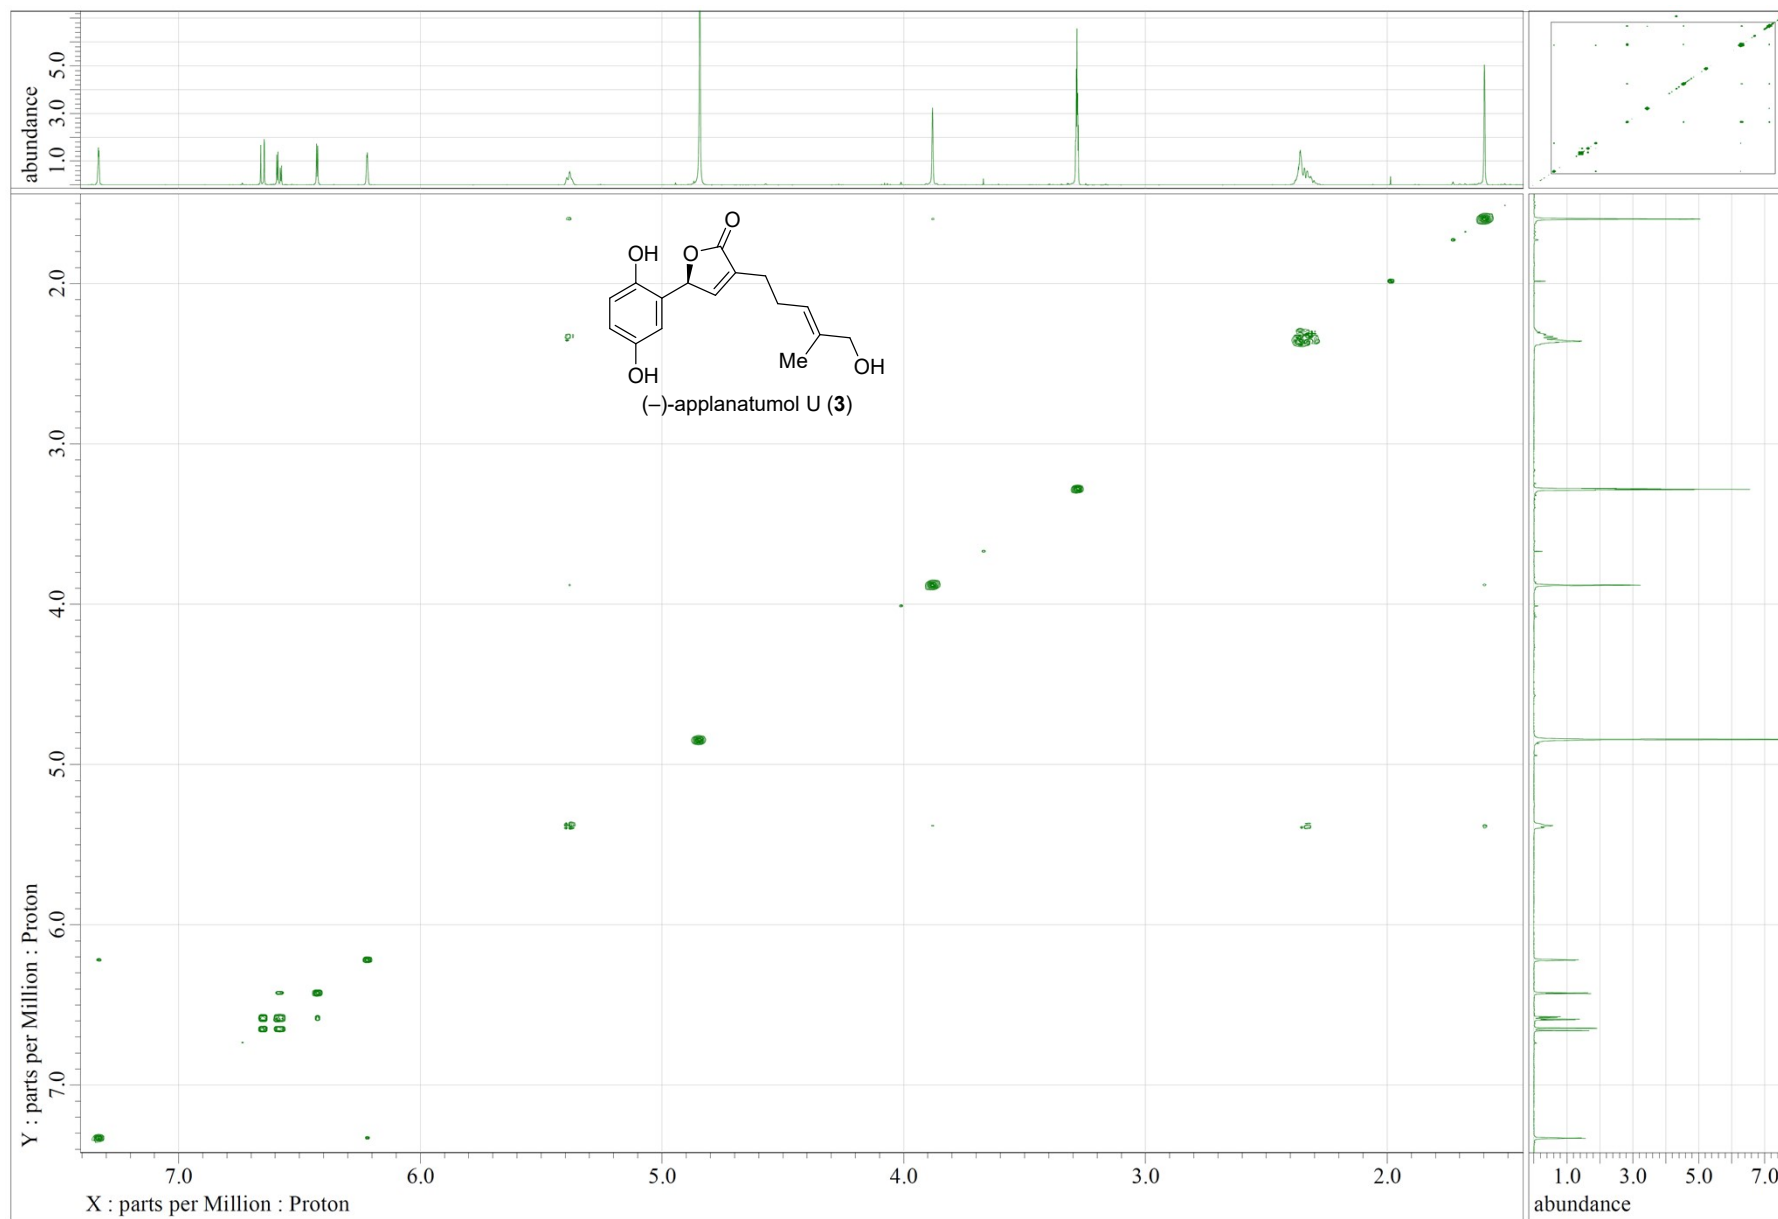

Figure S29. HMQC spectrum of (-)-applanatumol U (3).

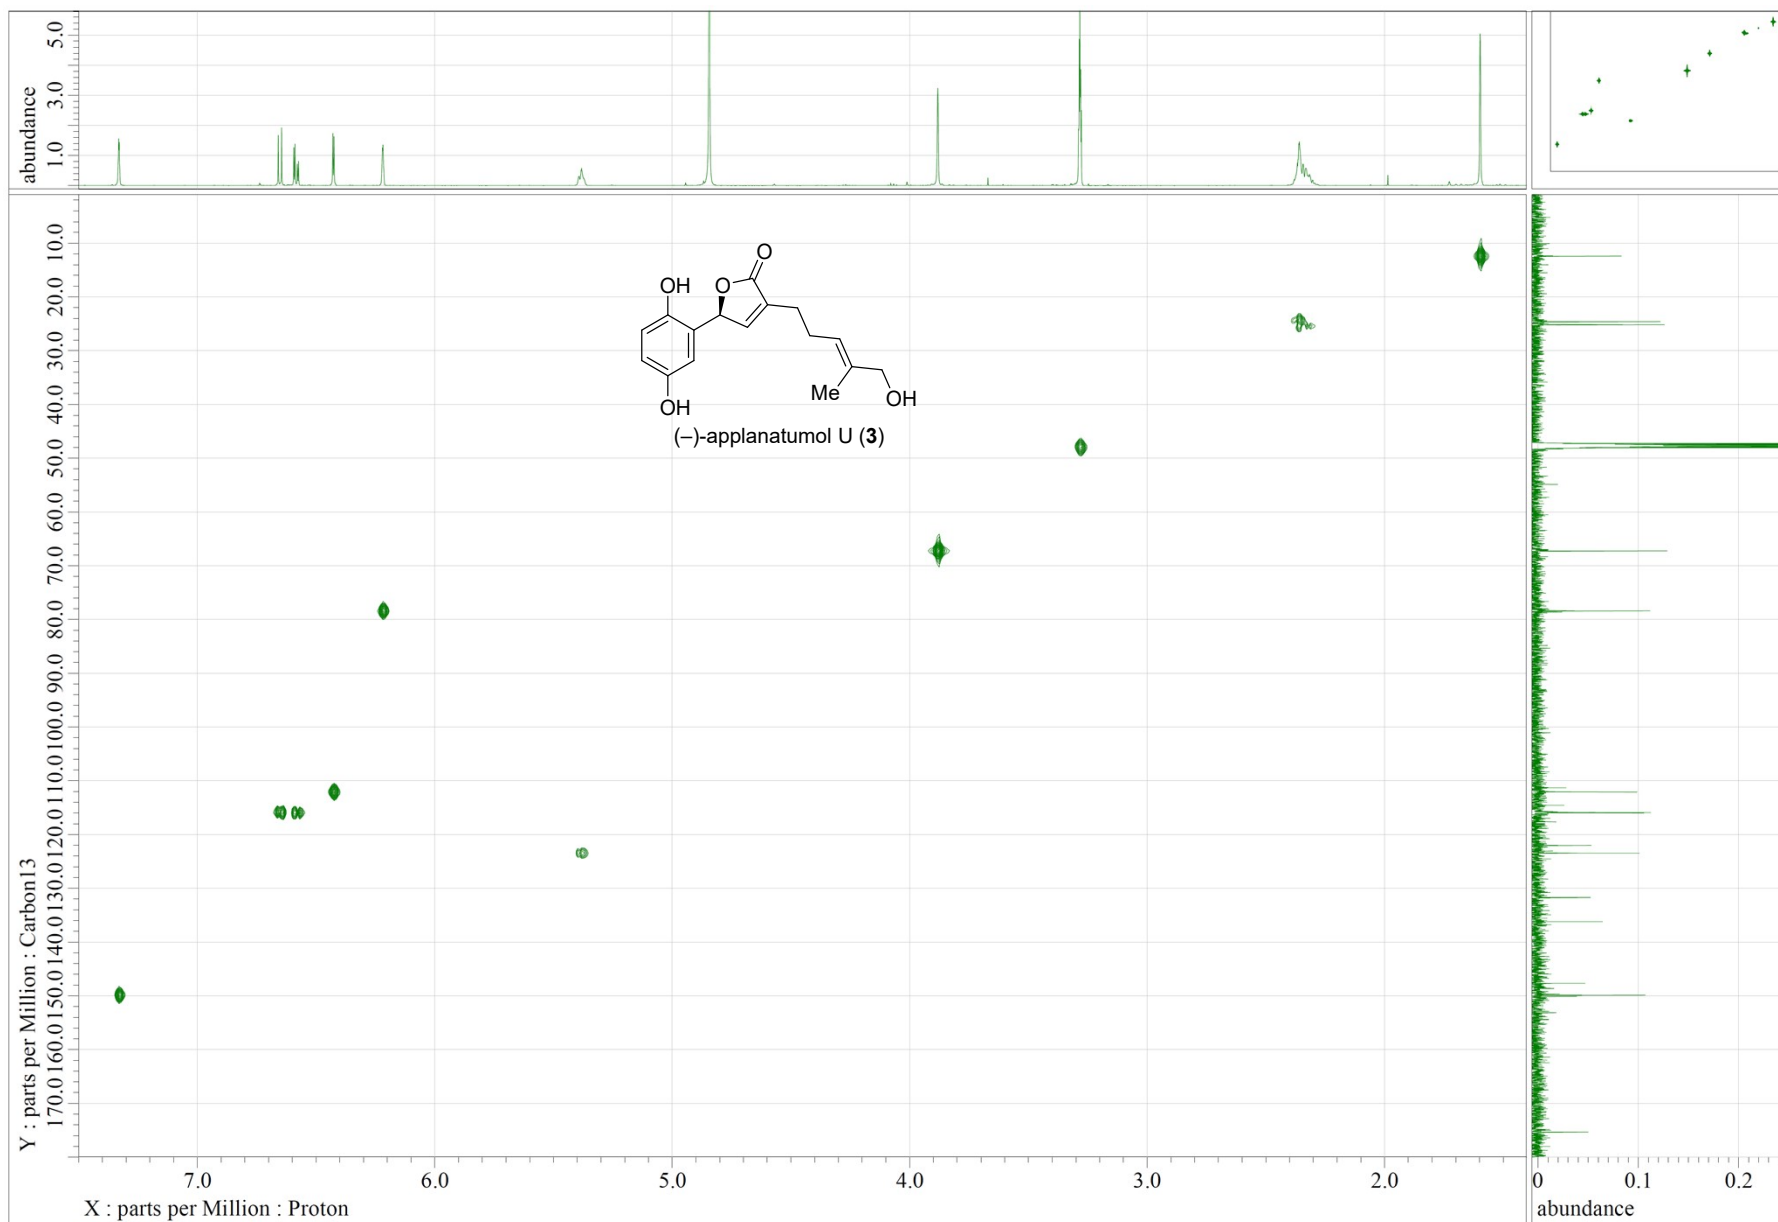

Figure S30. HMBC spectrum of (-)-applanatumol U (3).

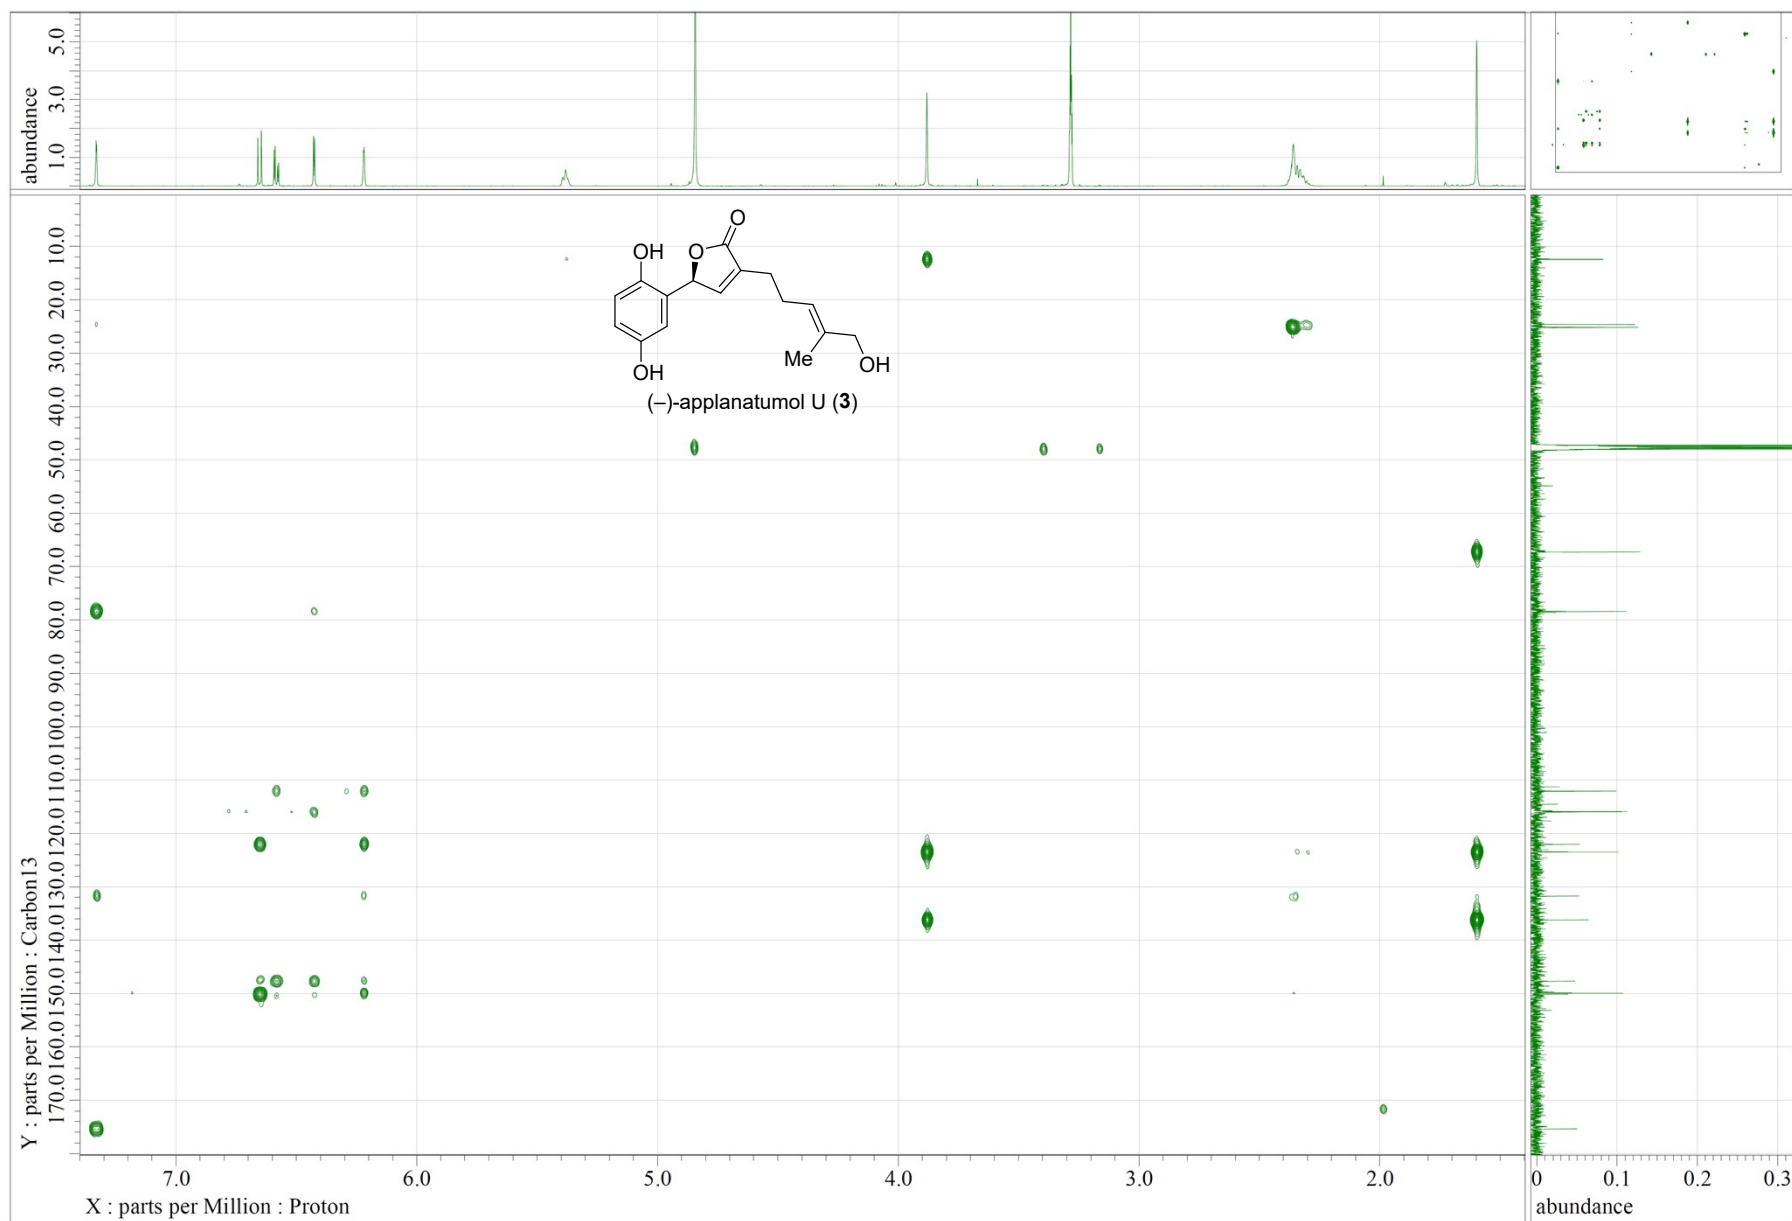

Figure S31. <sup>1</sup>H NMR spectrum (600 MHz, CDCl<sub>3</sub>) of compound 16.

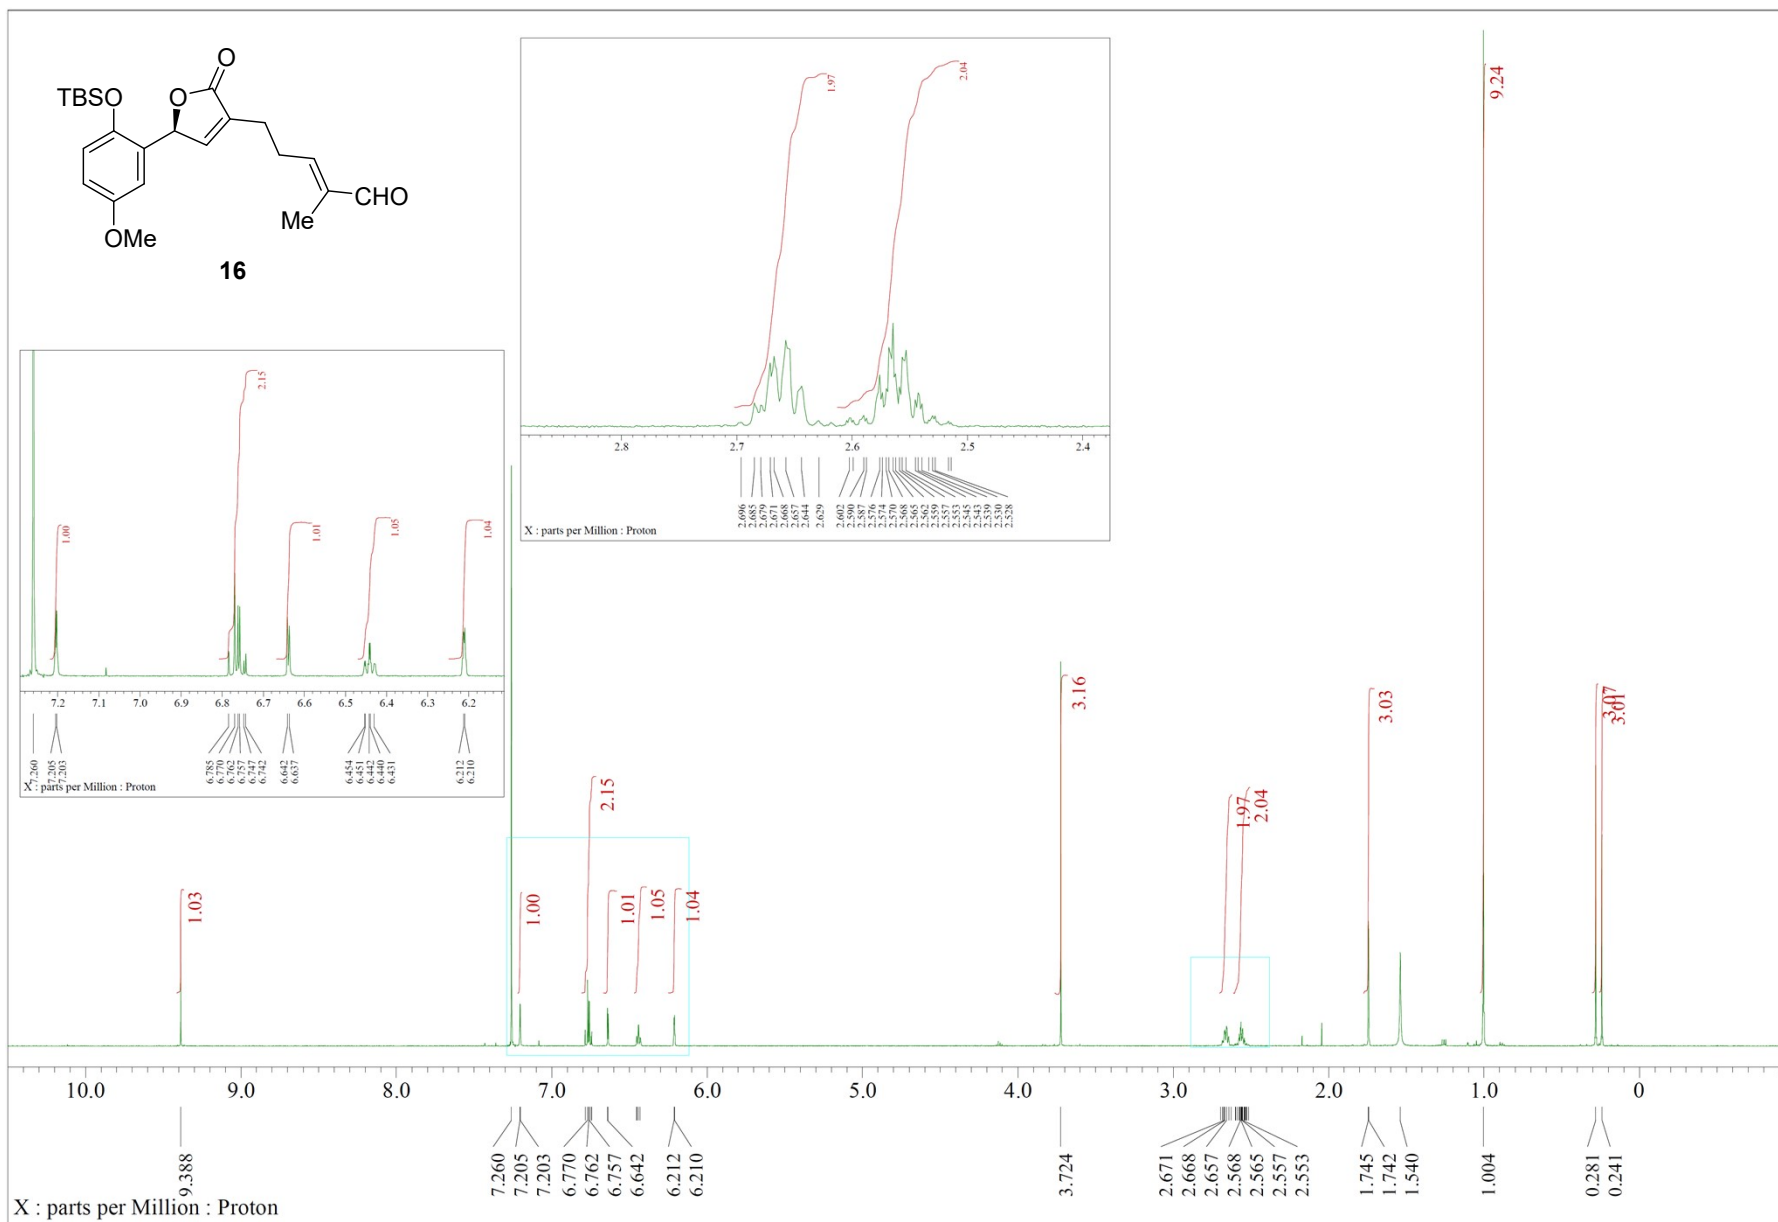

Figure S32.  $^{13}\text{C}$  NMR spectrum (150 MHz,  $\text{CDCl}_3$ ) of compound 16.

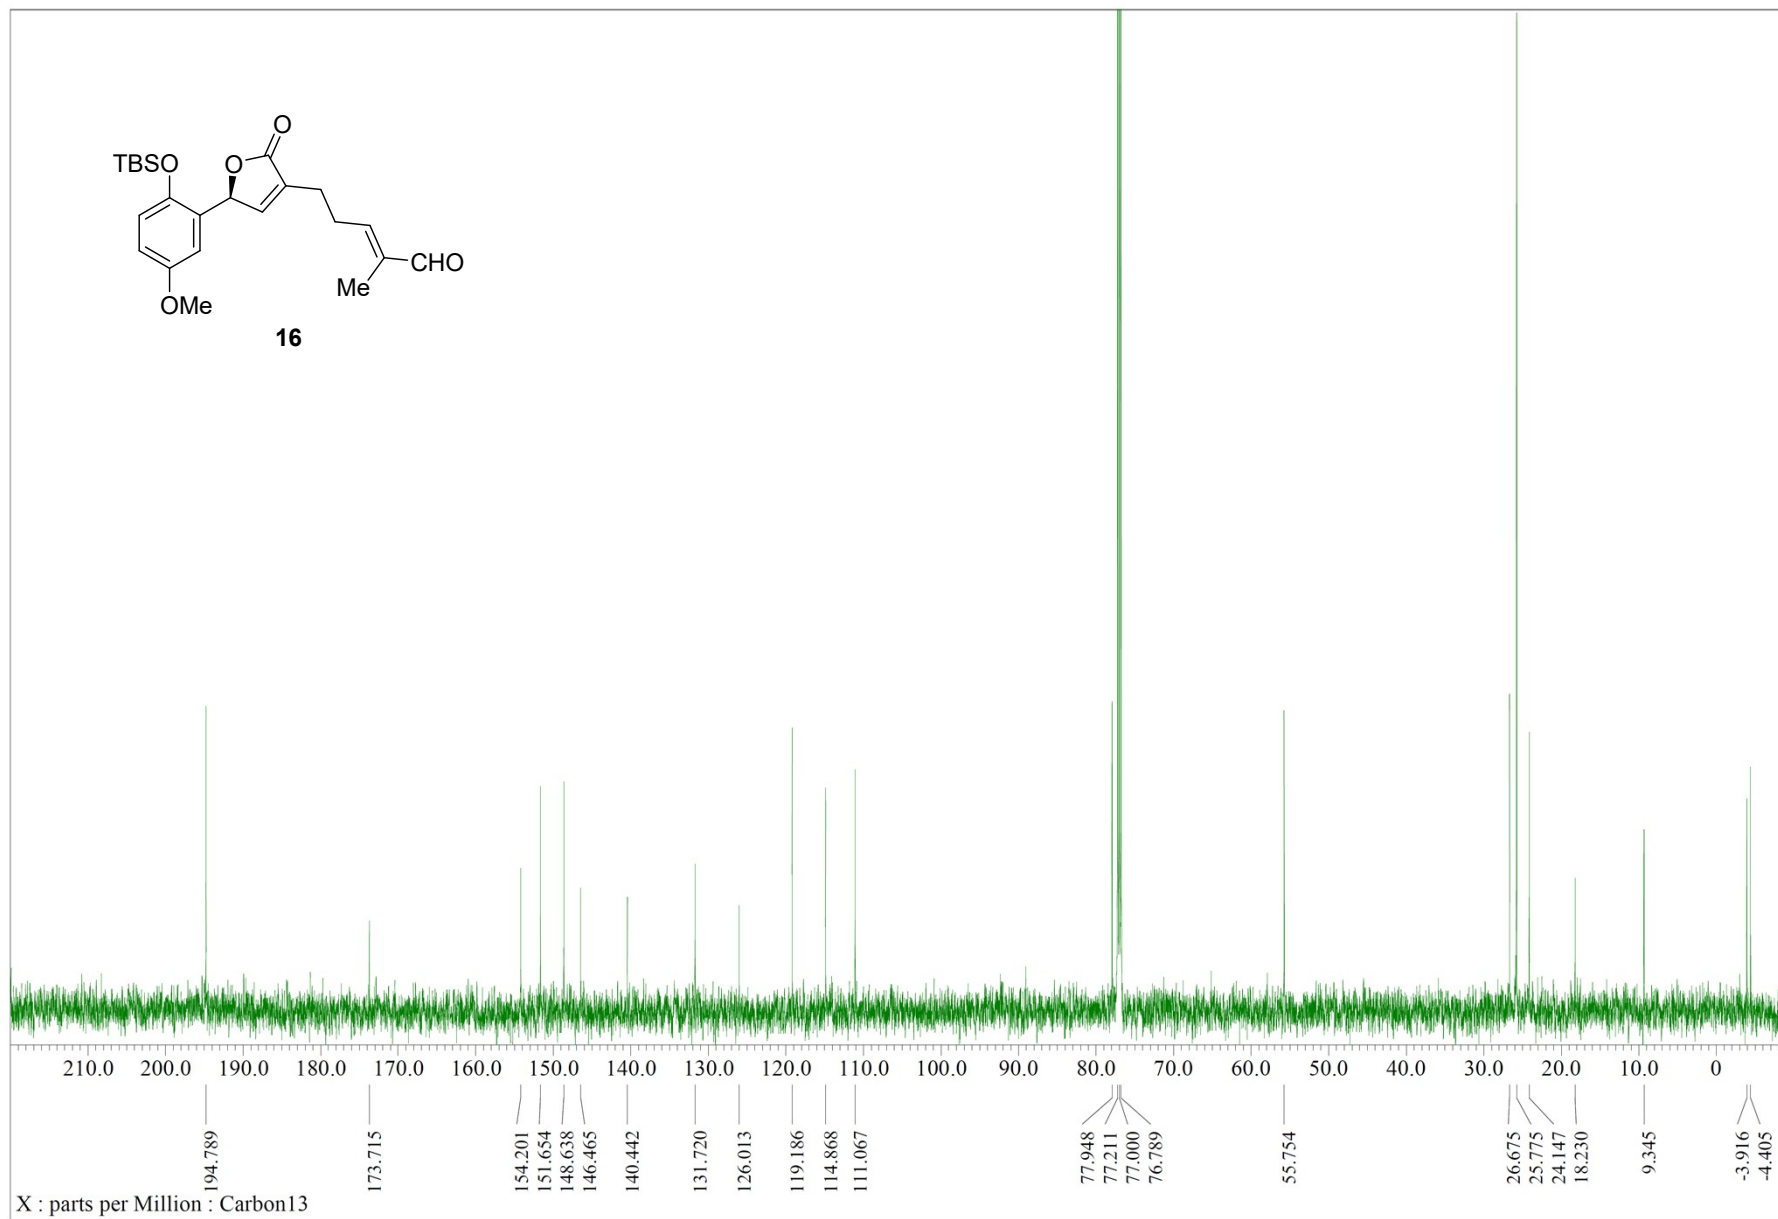



Figure S33. <sup>1</sup>H NMR spectrum (600 MHz, CD<sub>3</sub>OD) of (-)-chizhine E (2).

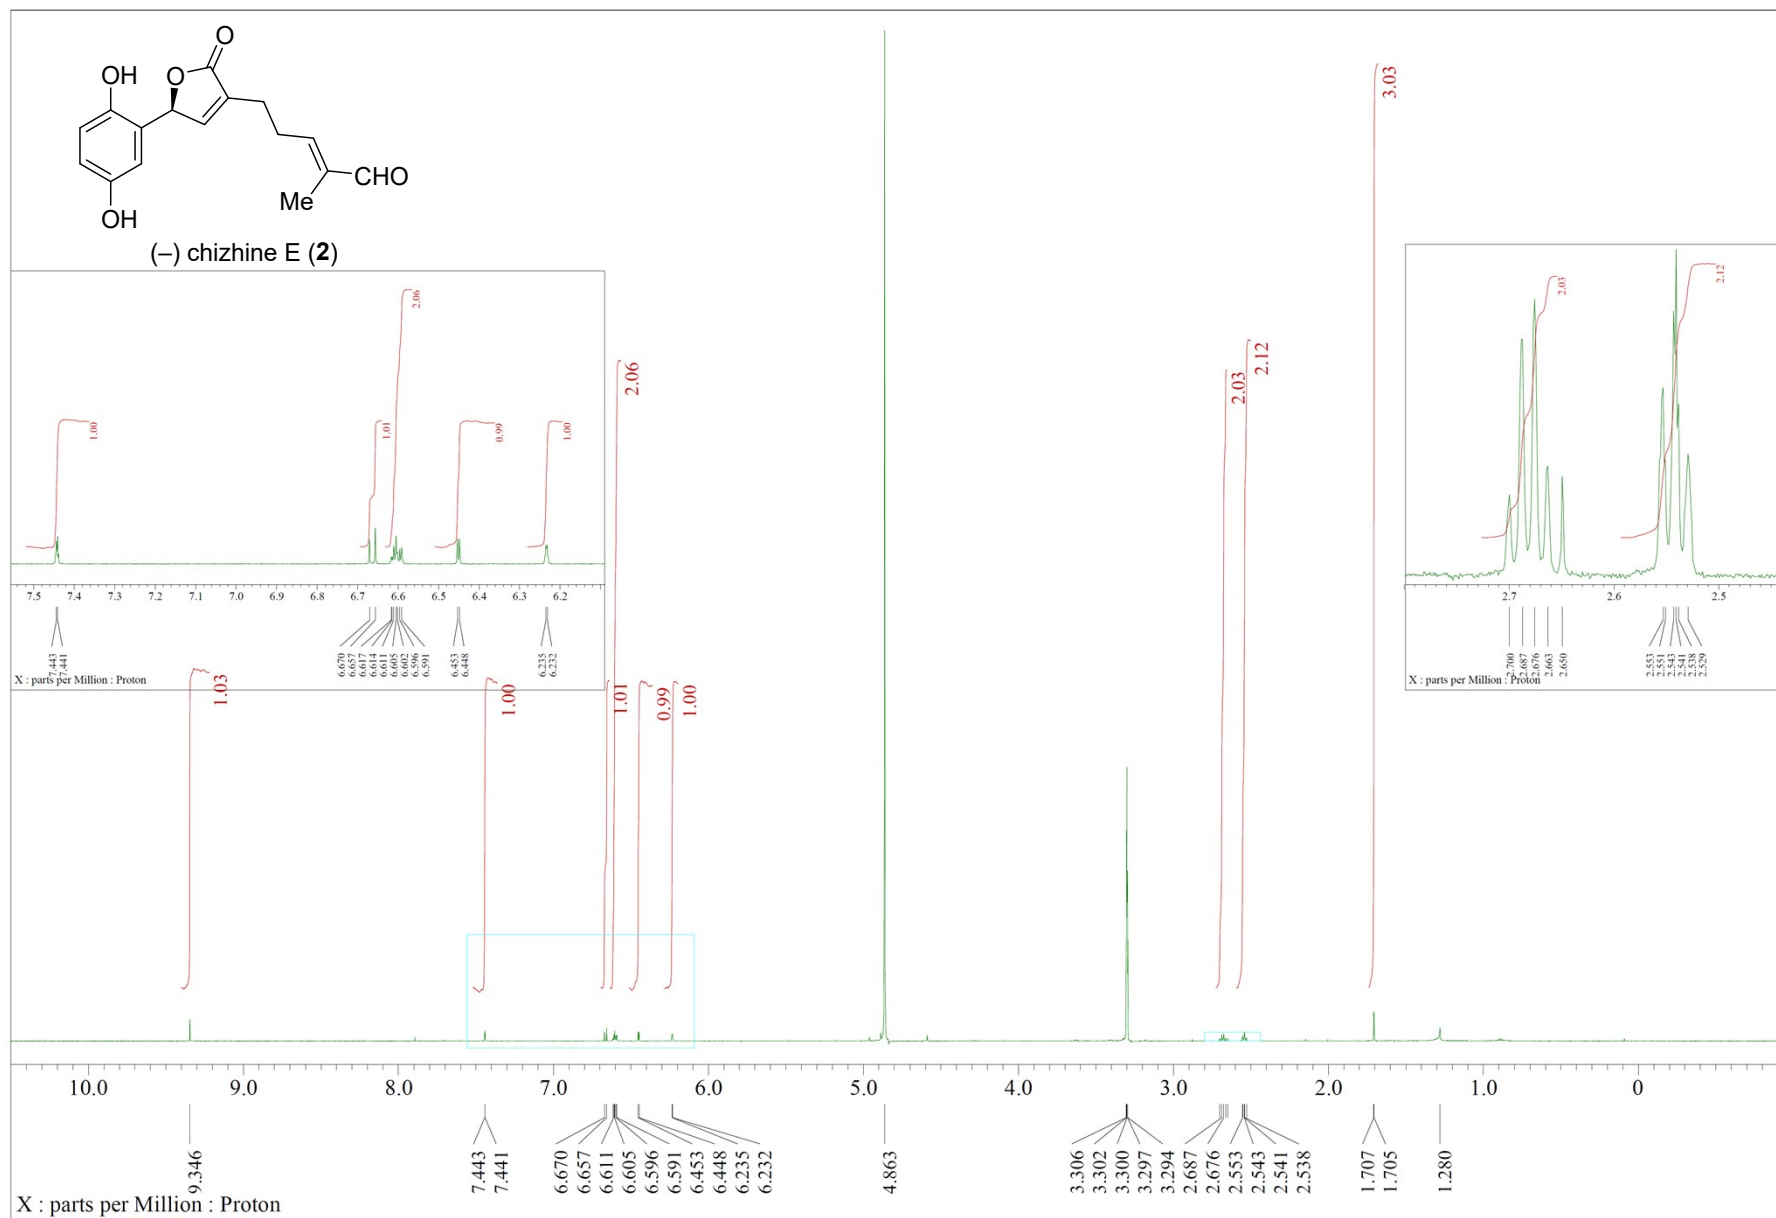

Figure S34.  $^{13}\text{C}$  NMR spectrum (150 MHz,  $\text{CD}_3\text{OD}$ ) of (-)-chizhine E (2).

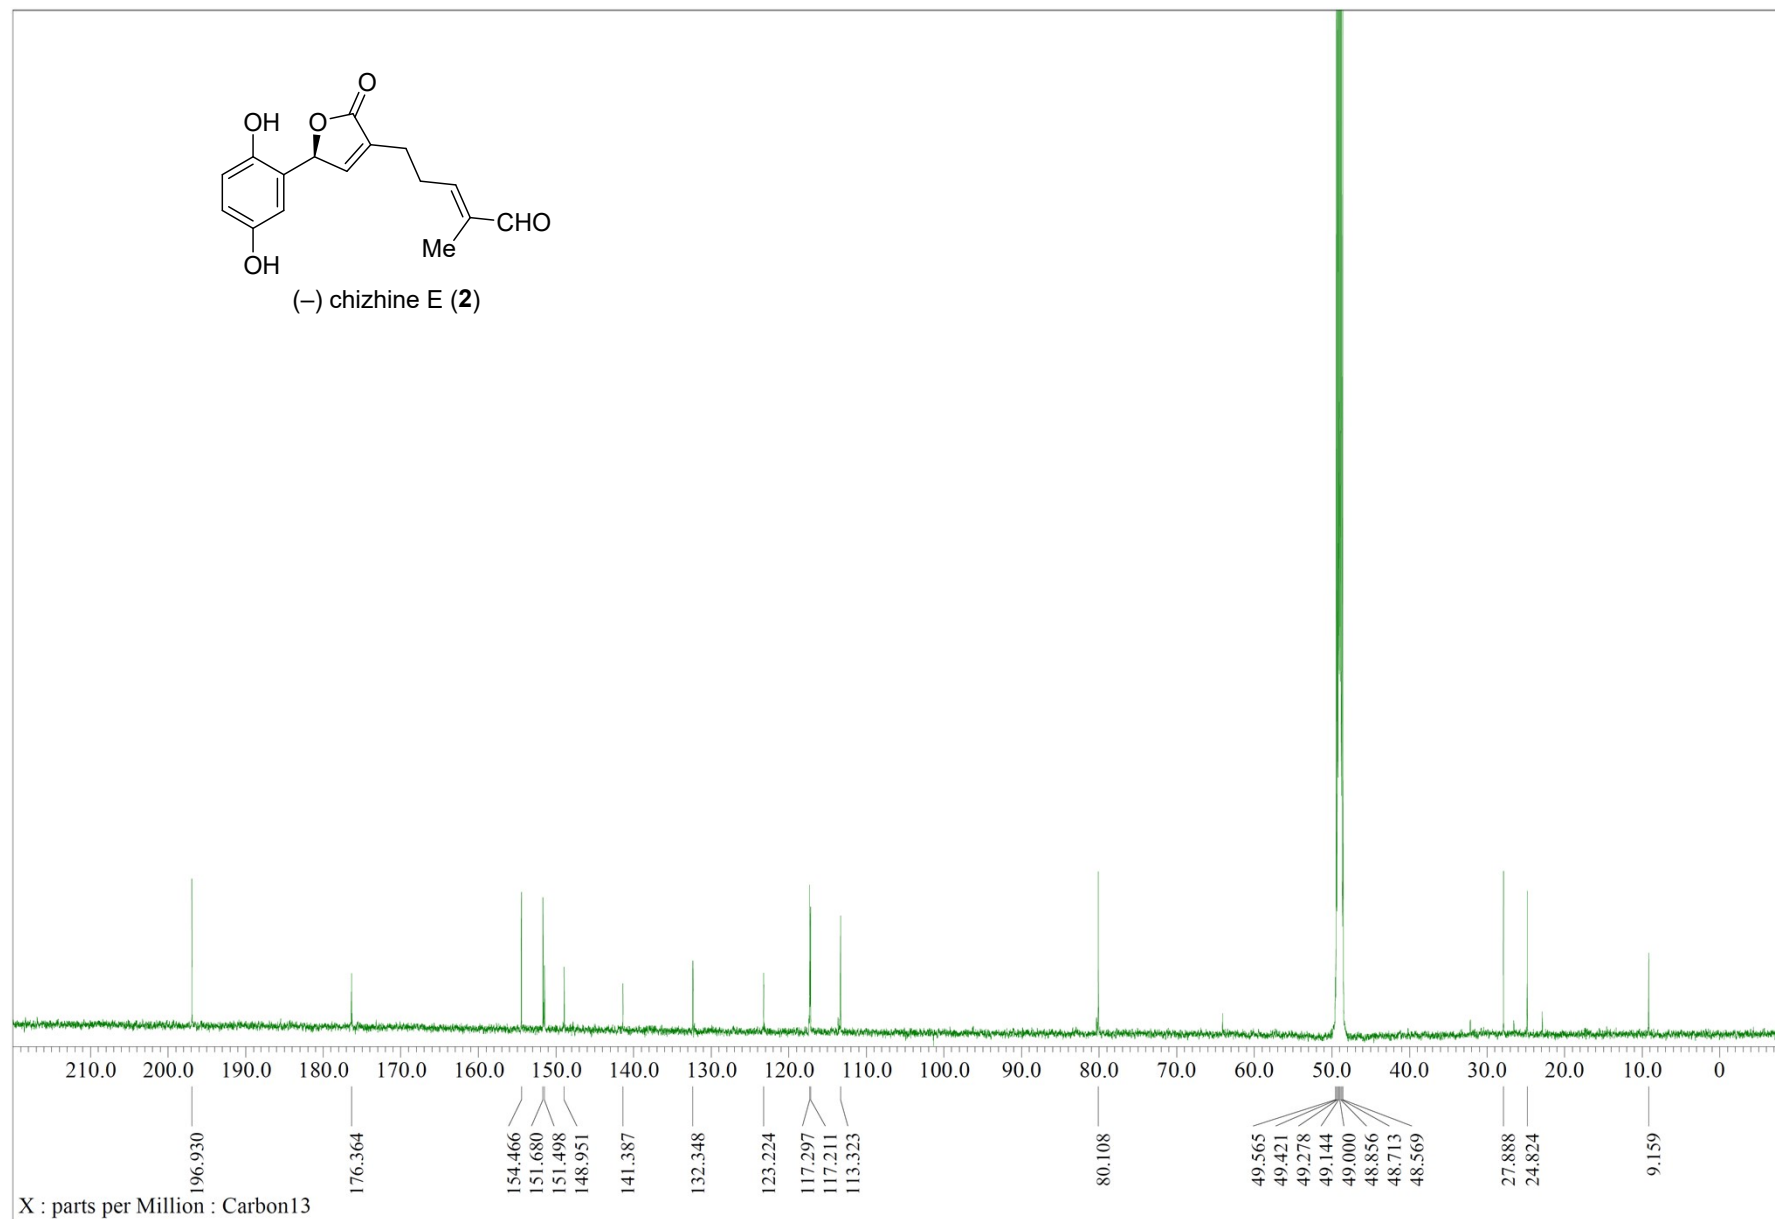

Figure S35. COSY spectrum of (-)-chizhine E (2).

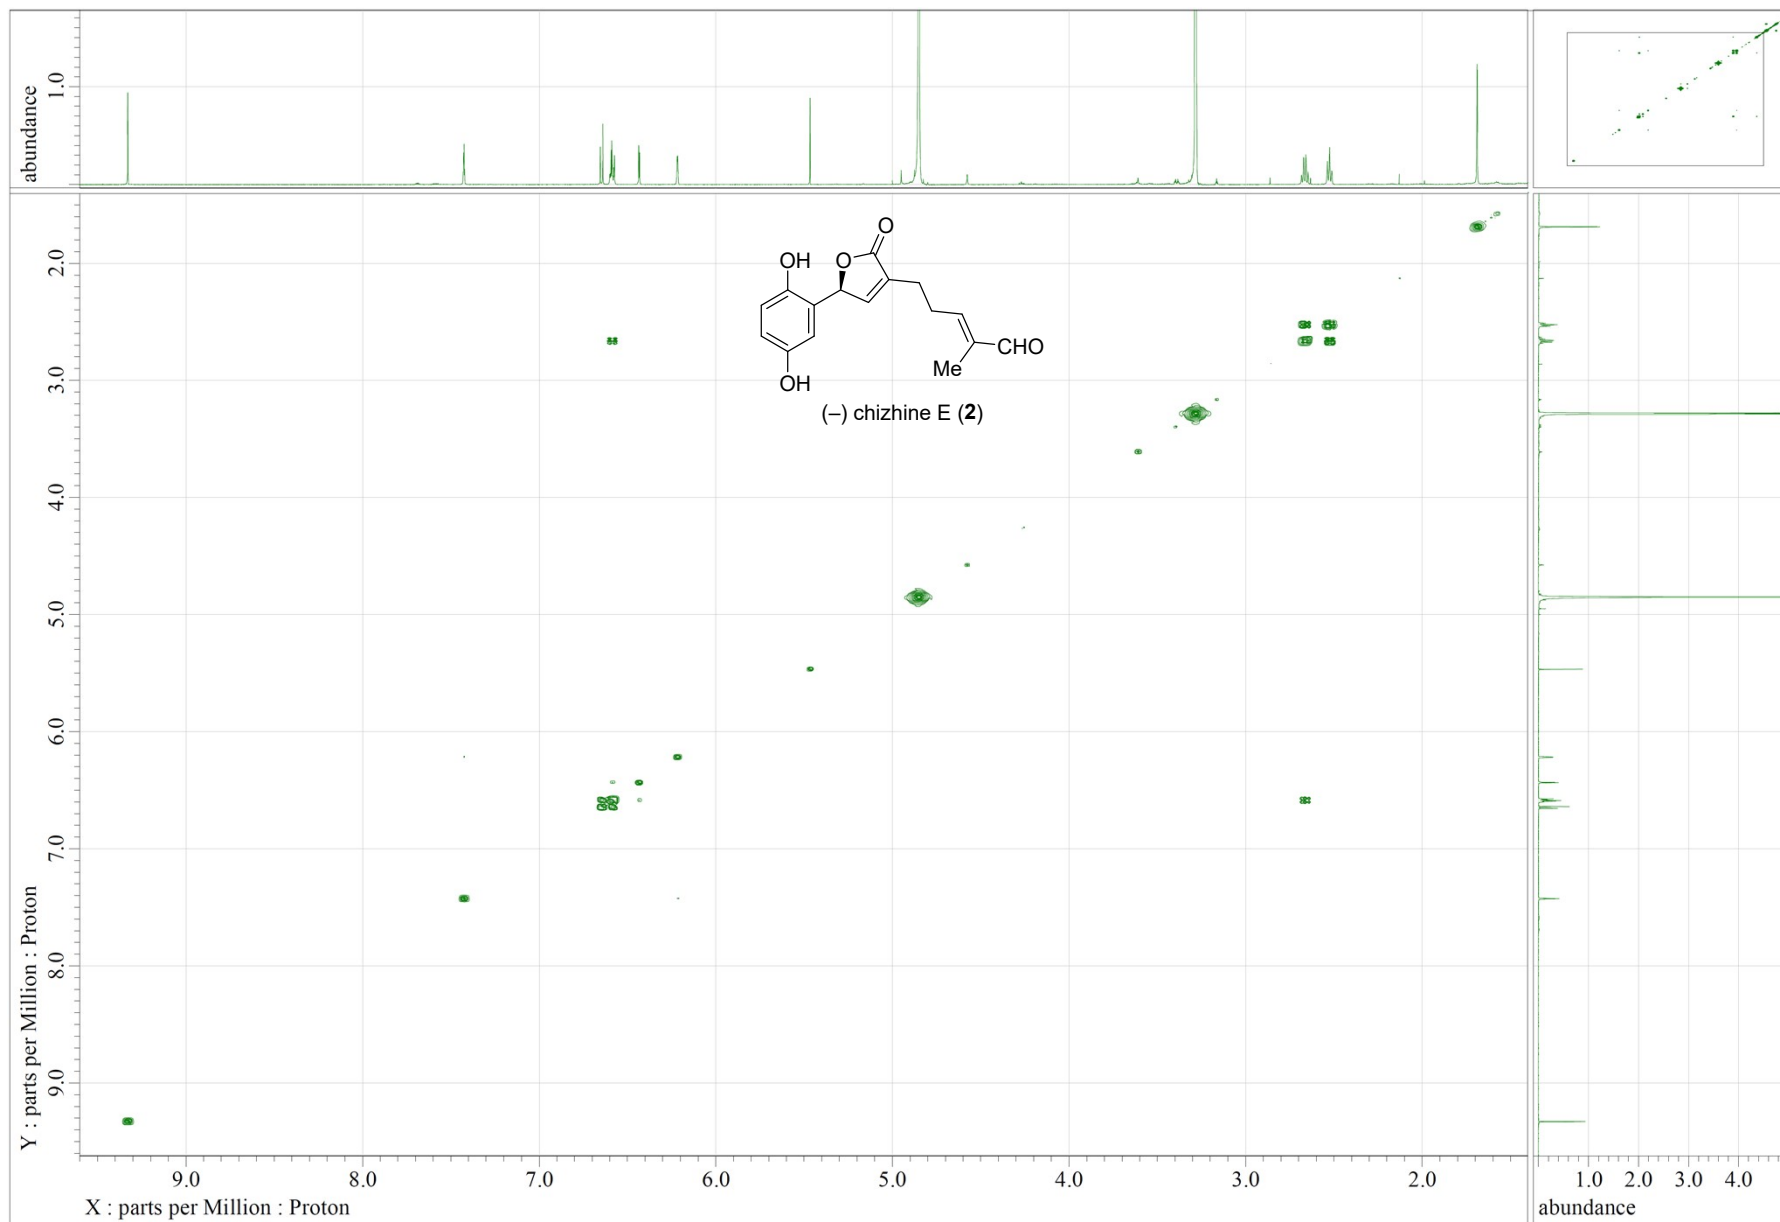

Figure S36. HMQC spectrum of (-)-chizhine E (2).

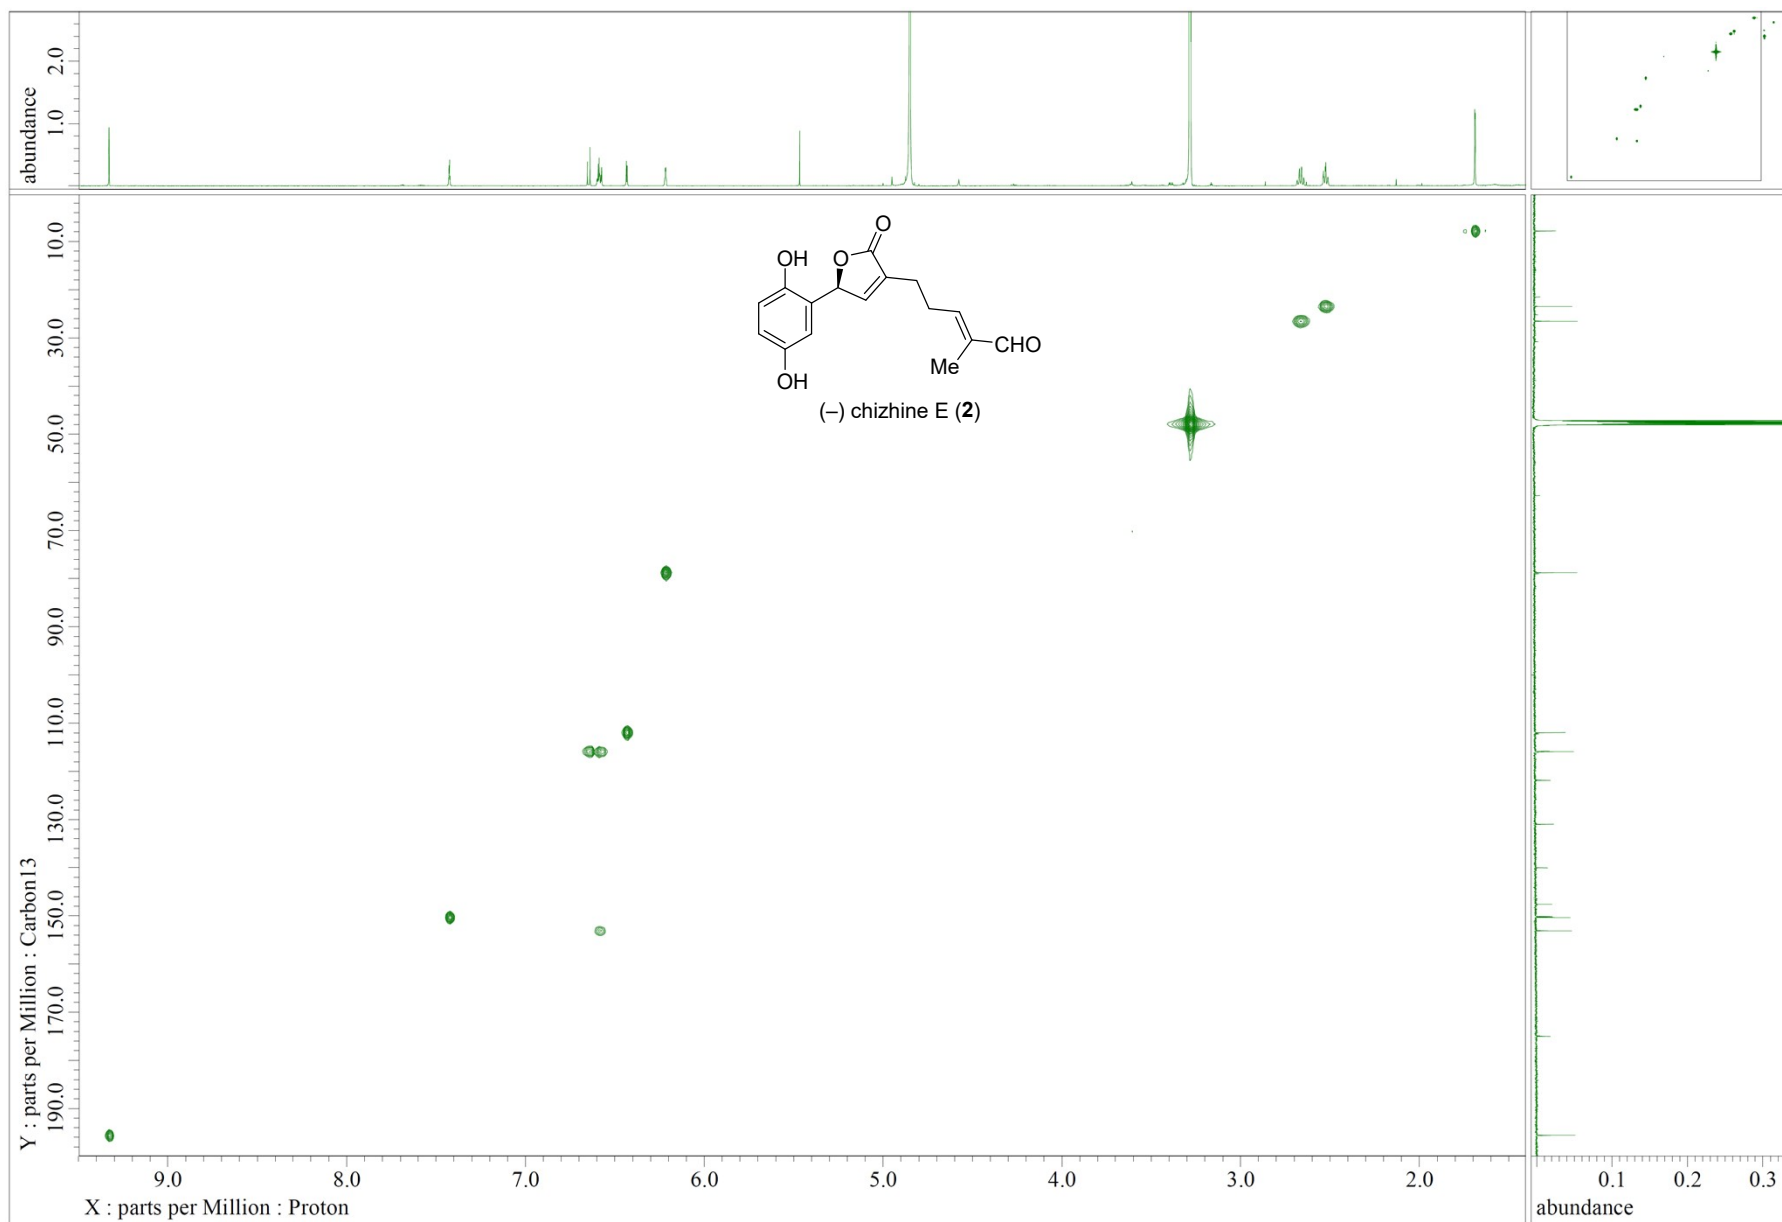

Figure S37. HMBC spectrum of (-)-chizhine E (2).

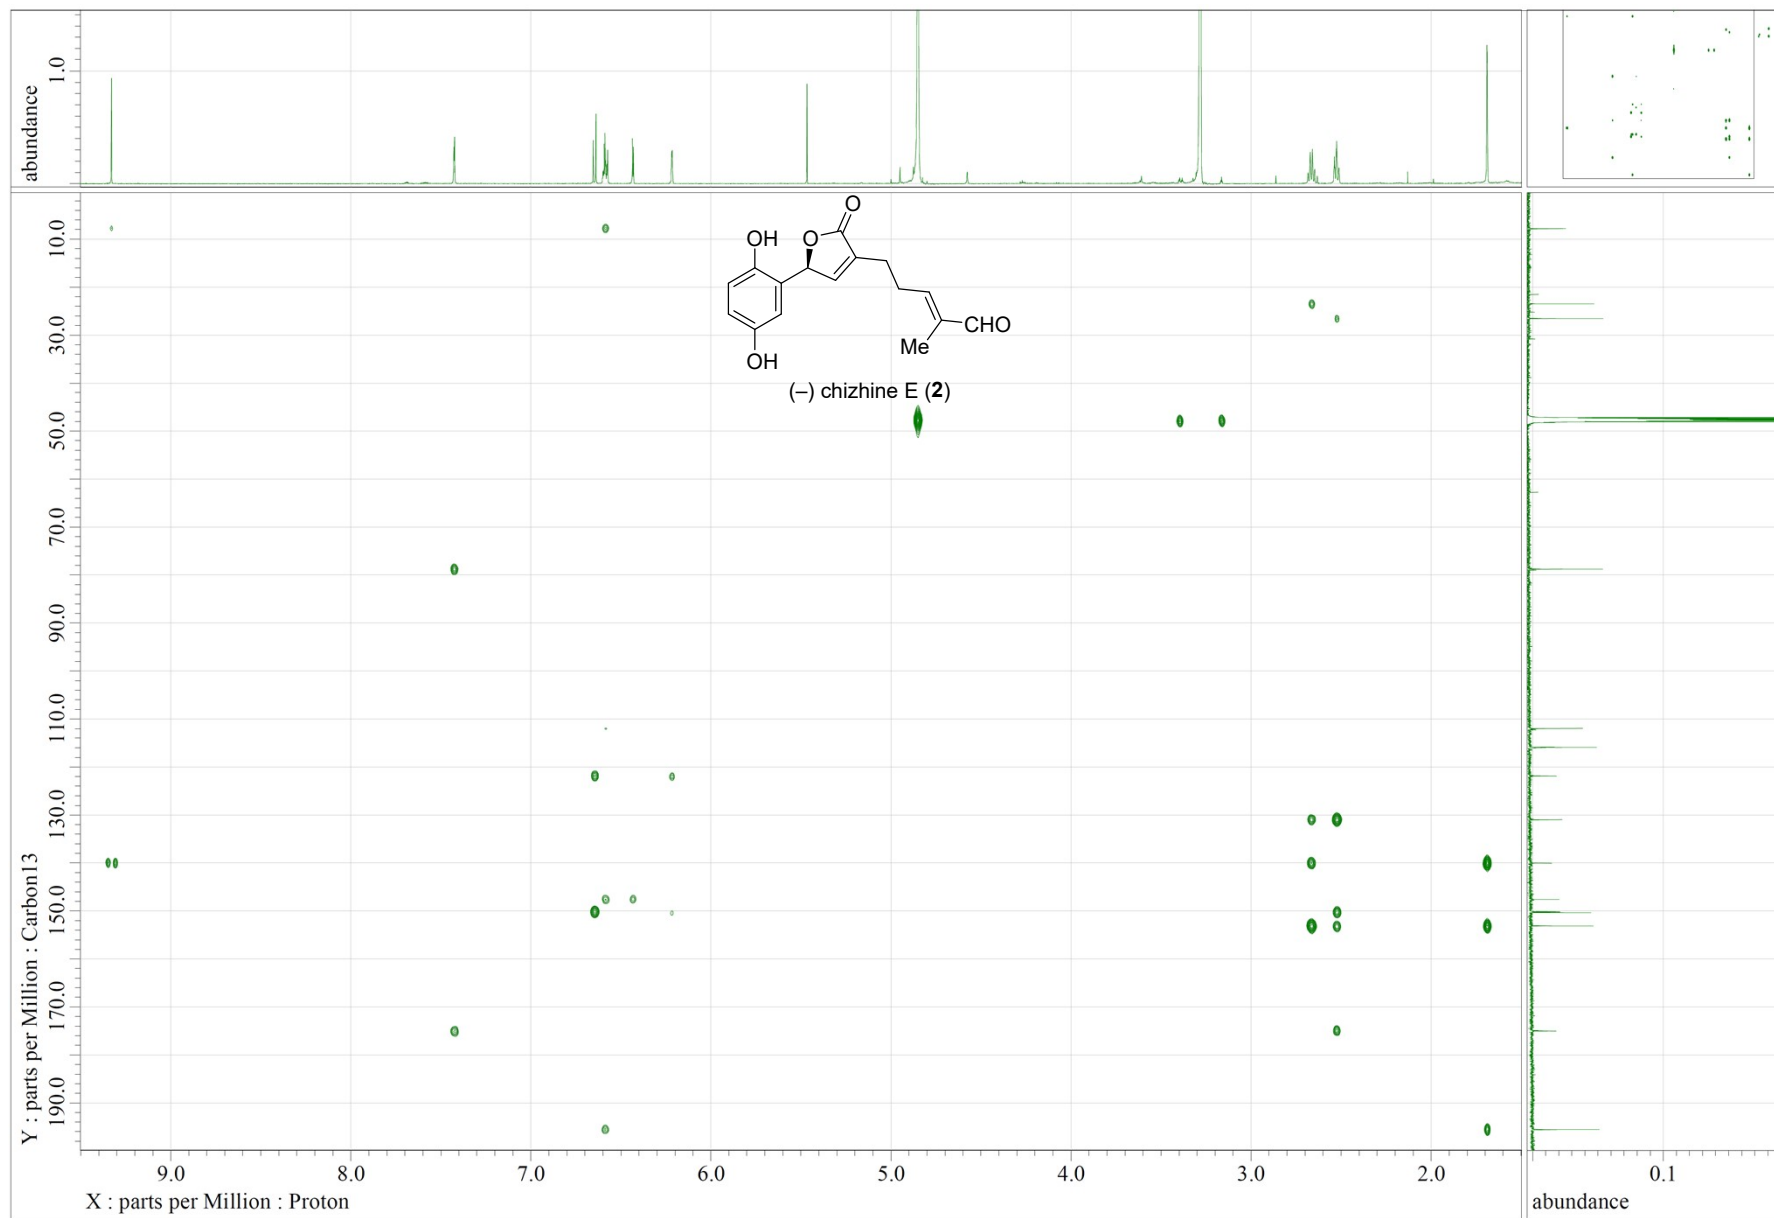

Figure S38. <sup>1</sup>H NMR spectrum (600 MHz, CDCl<sub>3</sub>) of compound 18.

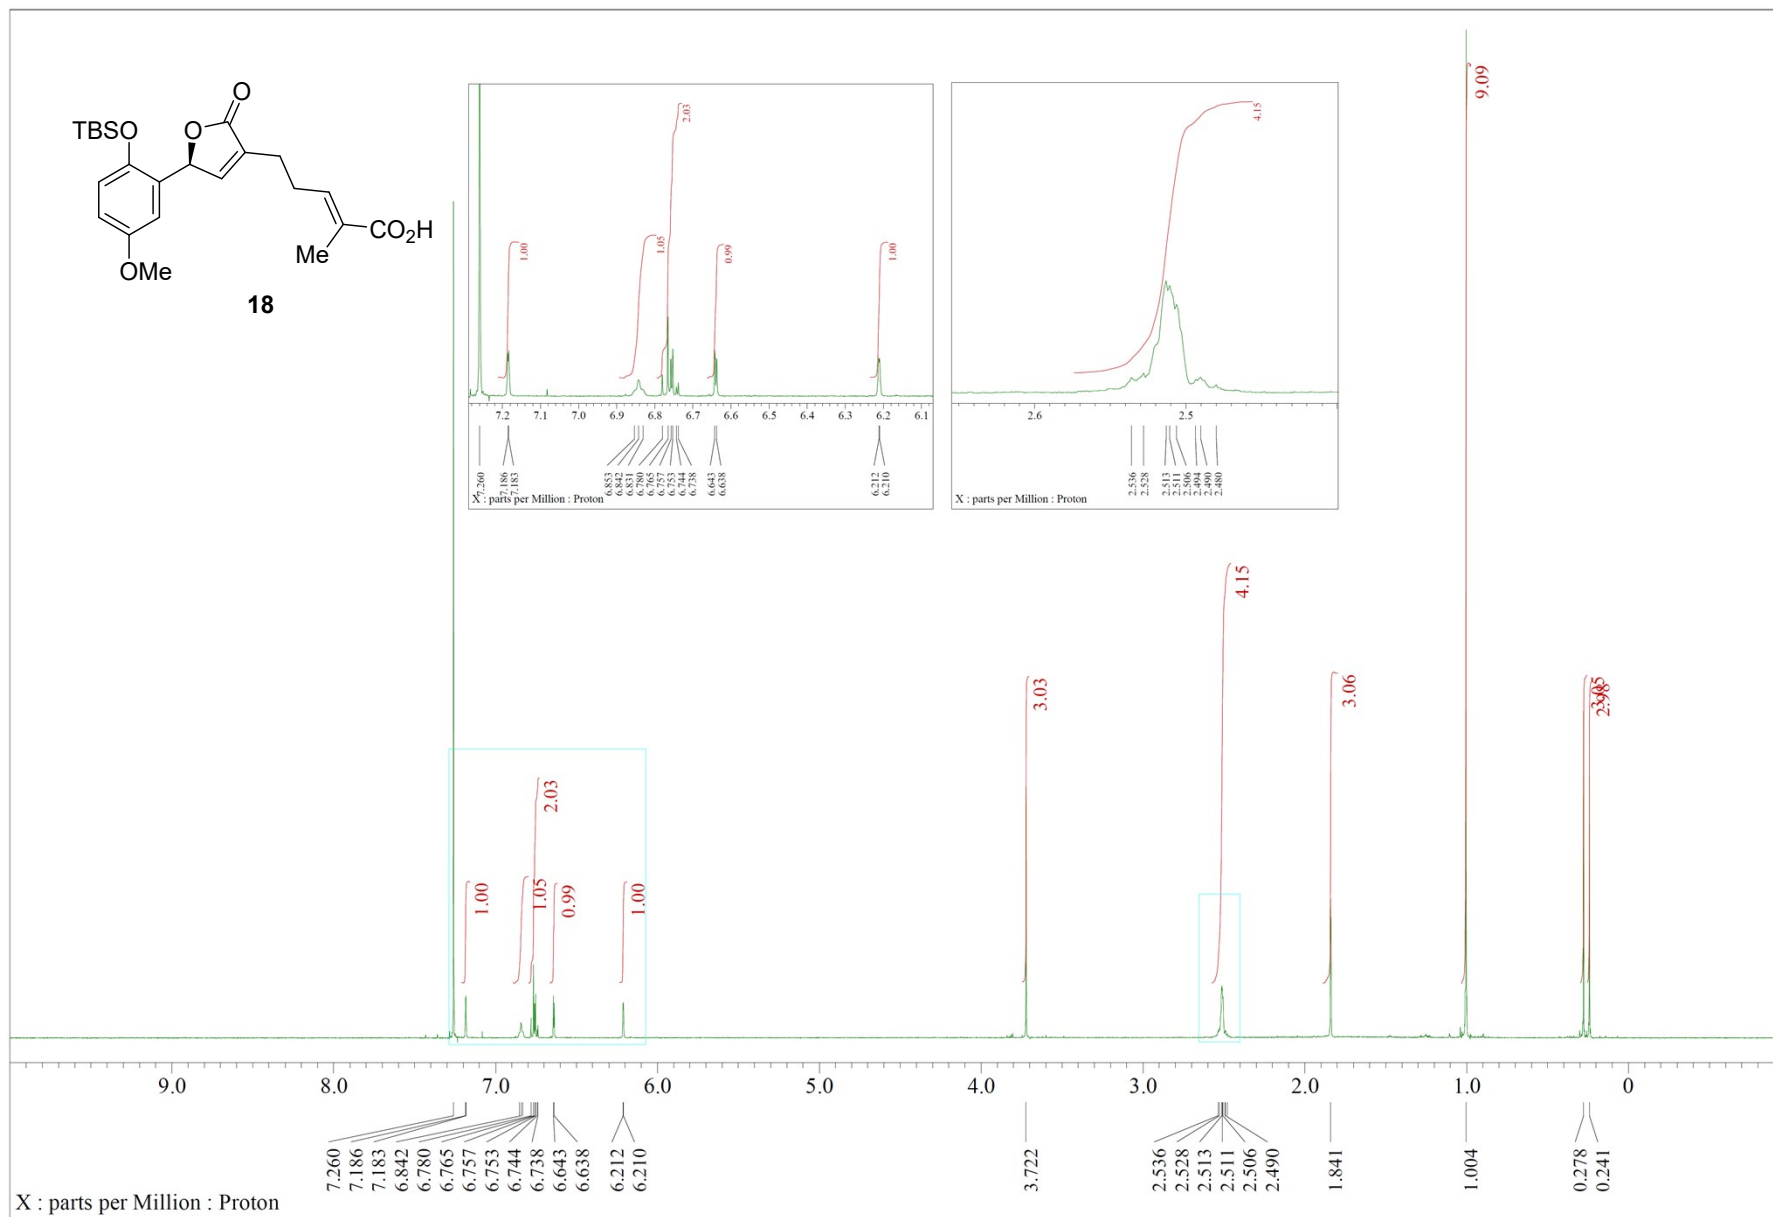

Figure S39.  $^{13}\text{C}$  NMR spectrum (150 MHz,  $\text{CDCl}_3$ ) of compound 18.

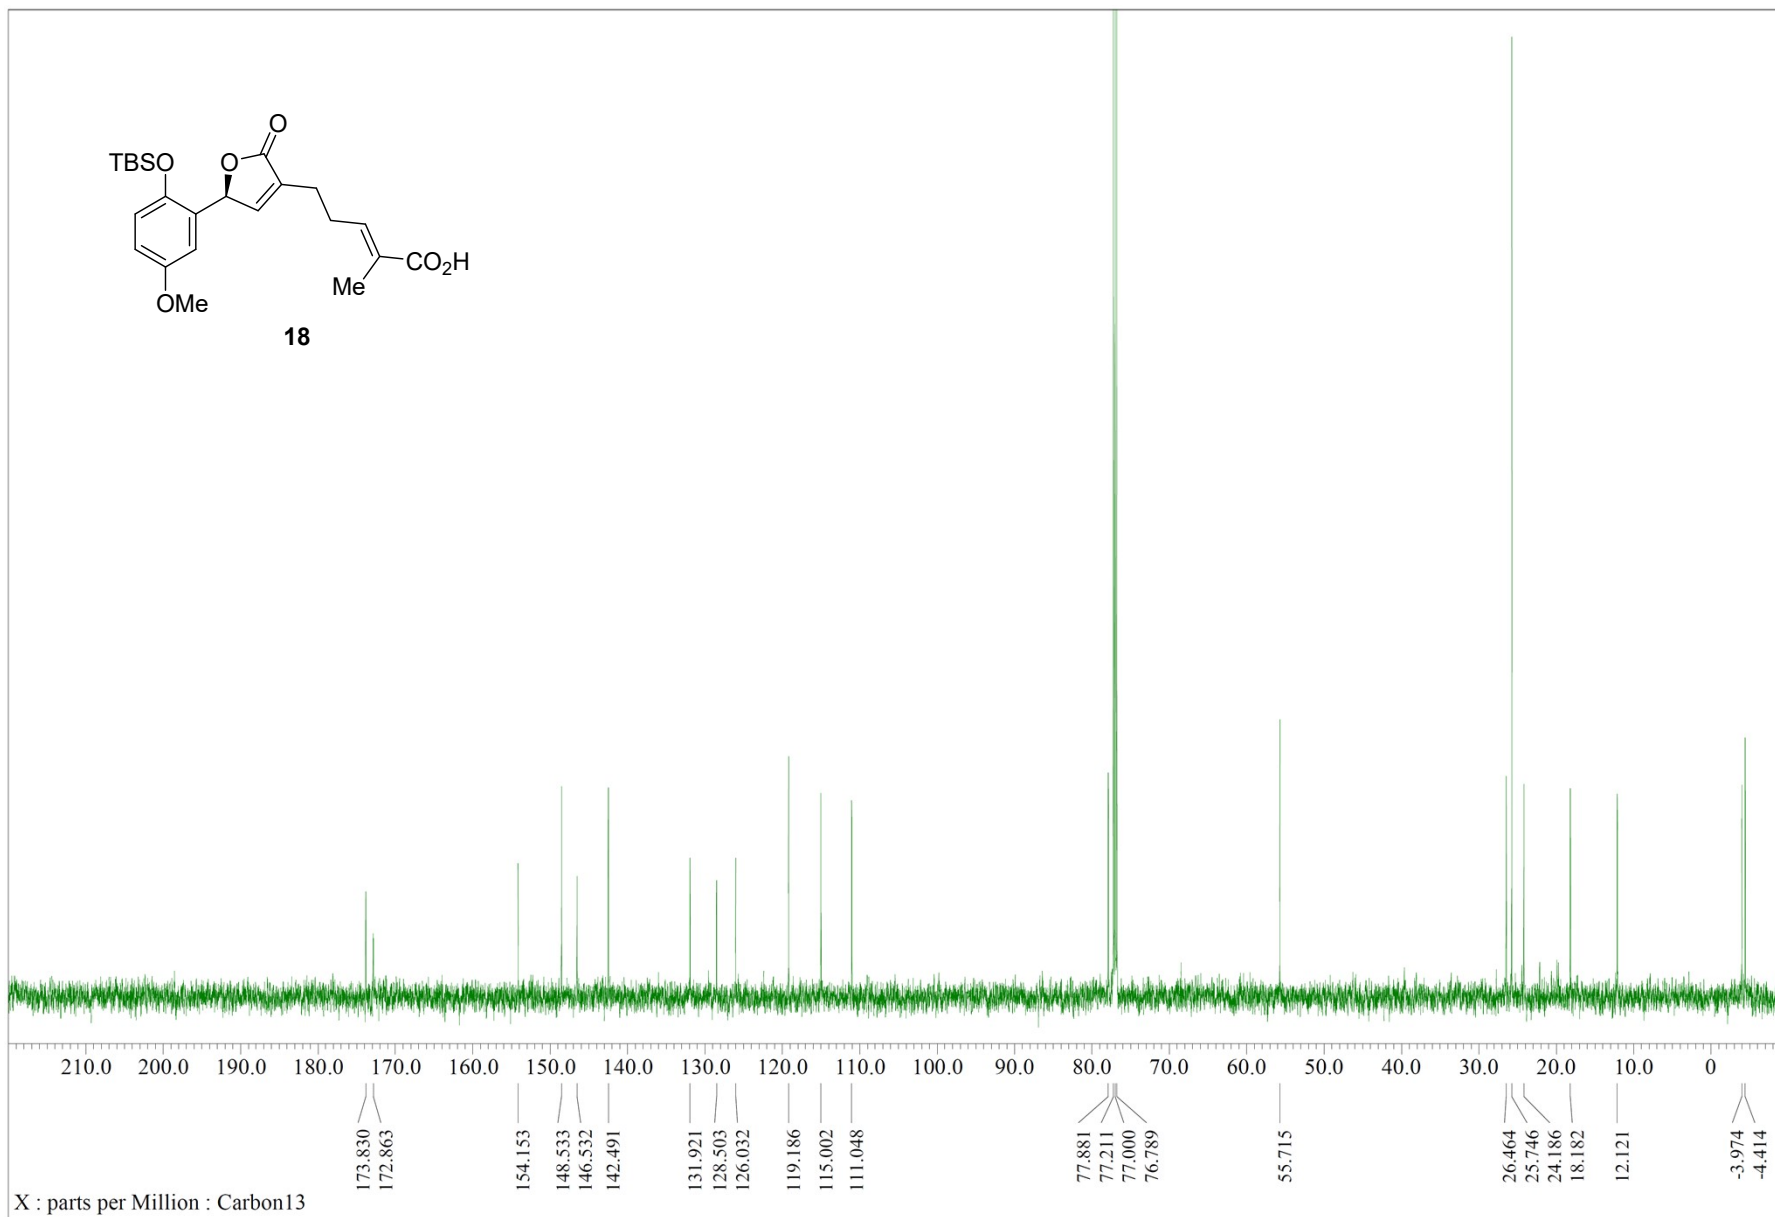

Figure S40. <sup>1</sup>H NMR spectrum (600 MHz, CD<sub>3</sub>OD) of (-)-oregonensin A (1).

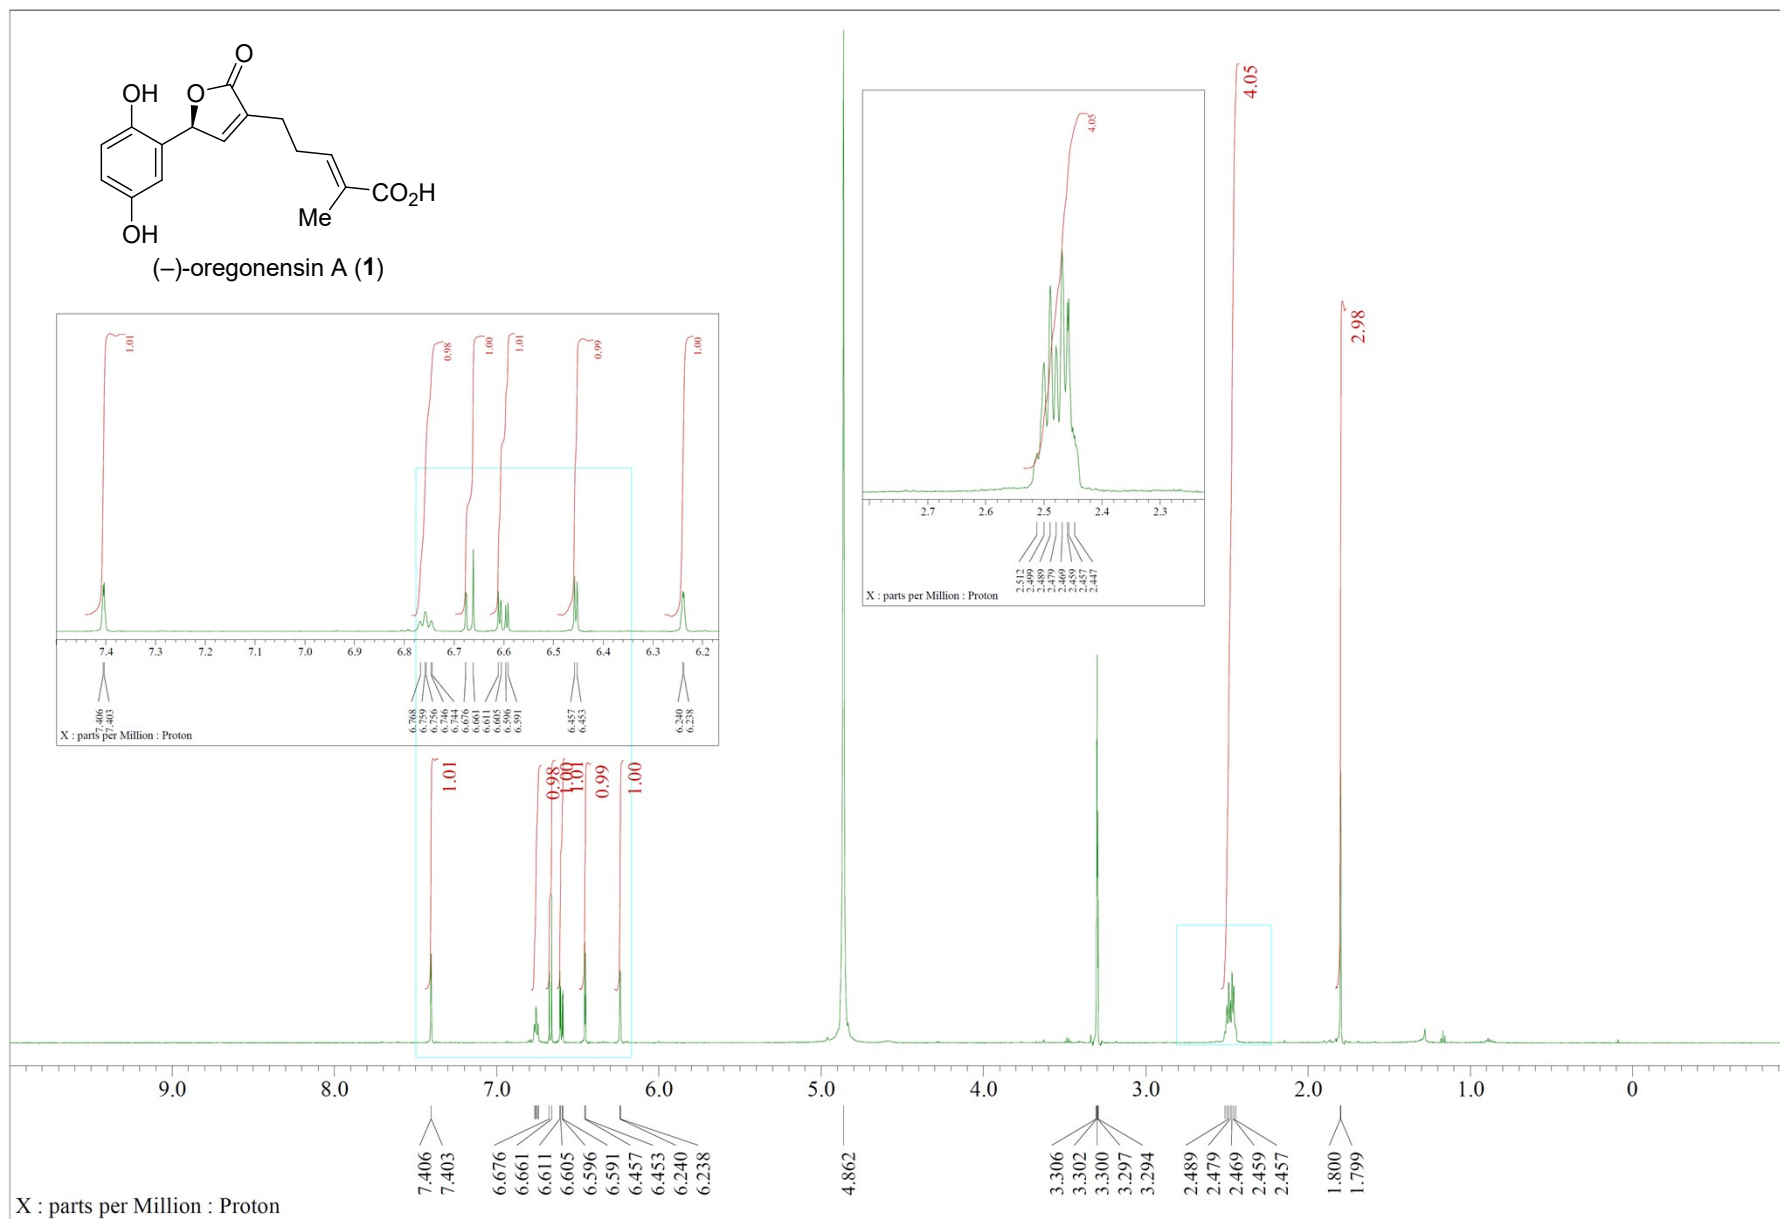



Figure S41.  $^{13}\text{C}$  NMR spectrum (150 MHz,  $\text{CD}_3\text{OD}$ ) of (-)-oregonensin A (1).

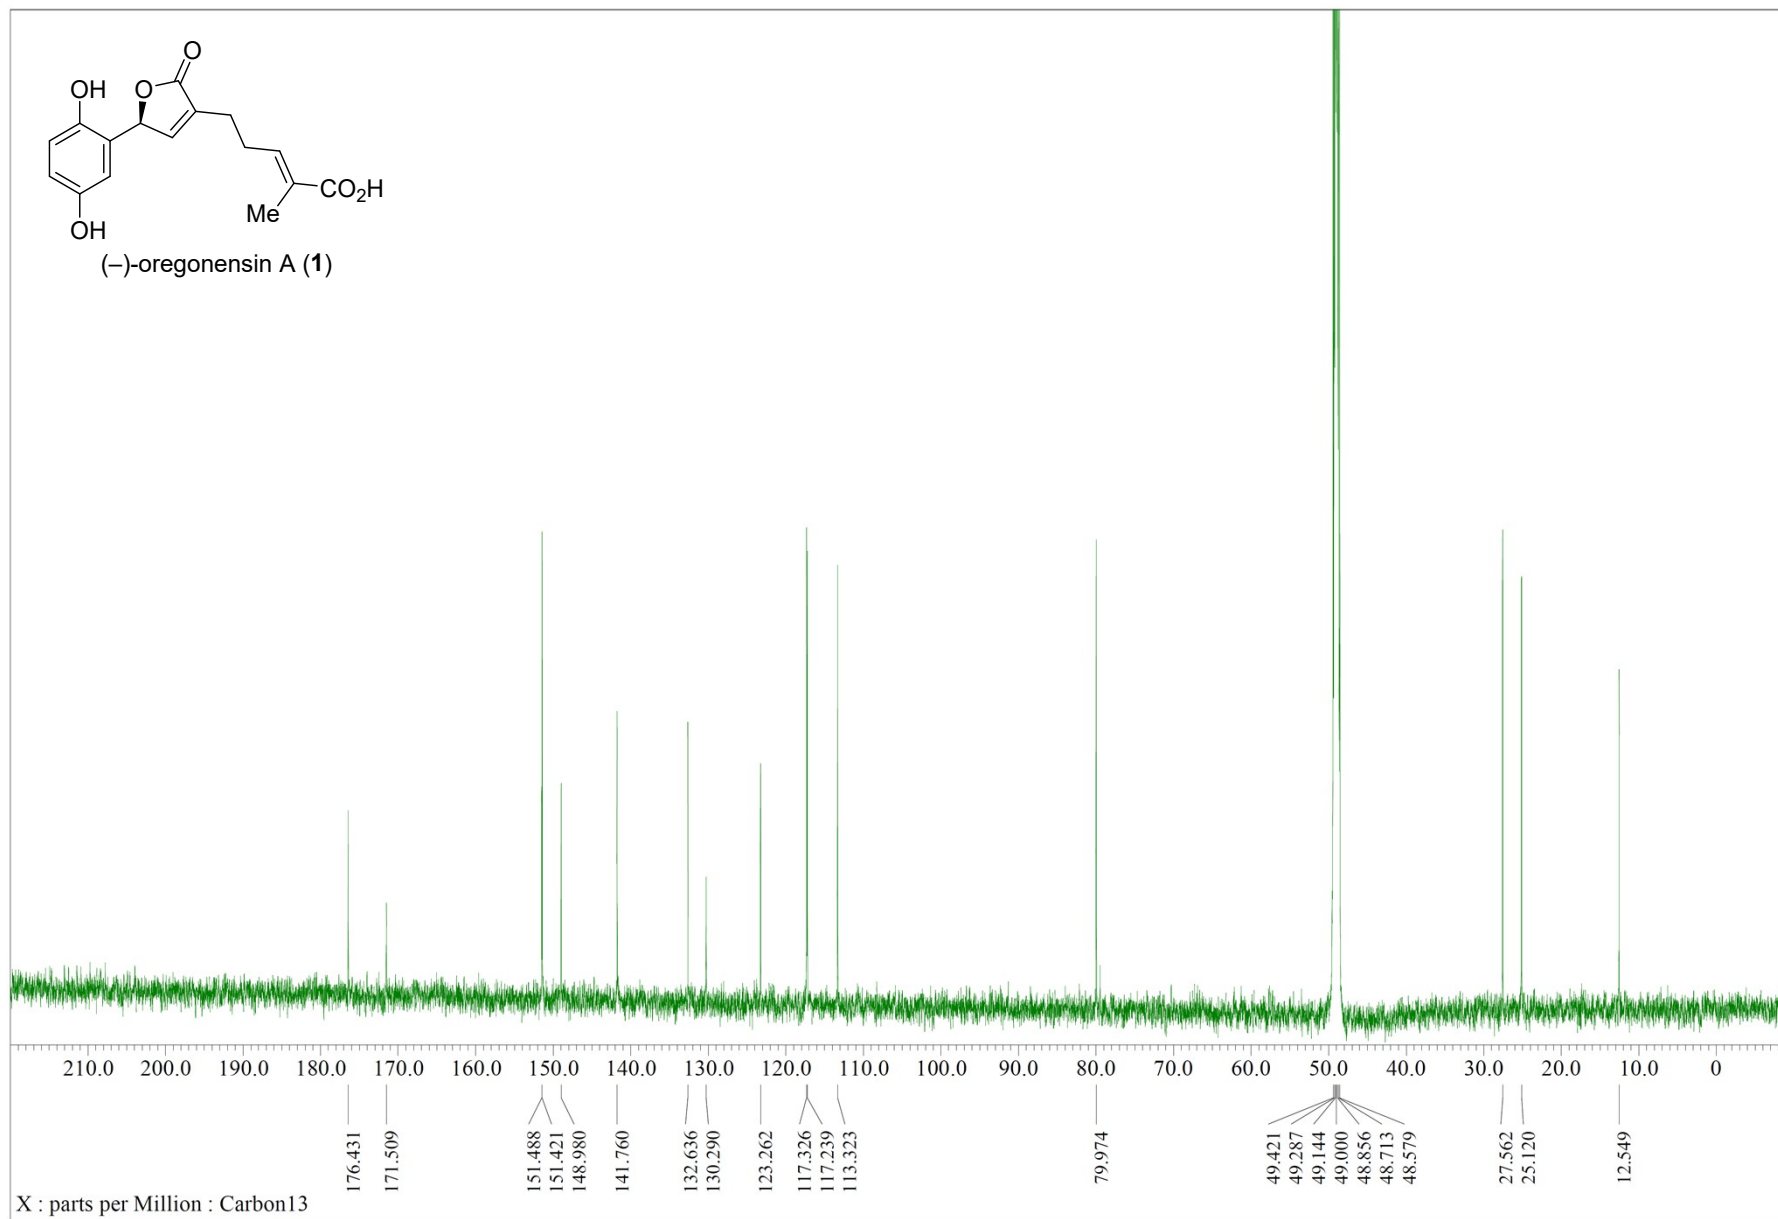

Figure S42. COSY spectrum of (-)-oregonensin A (1).

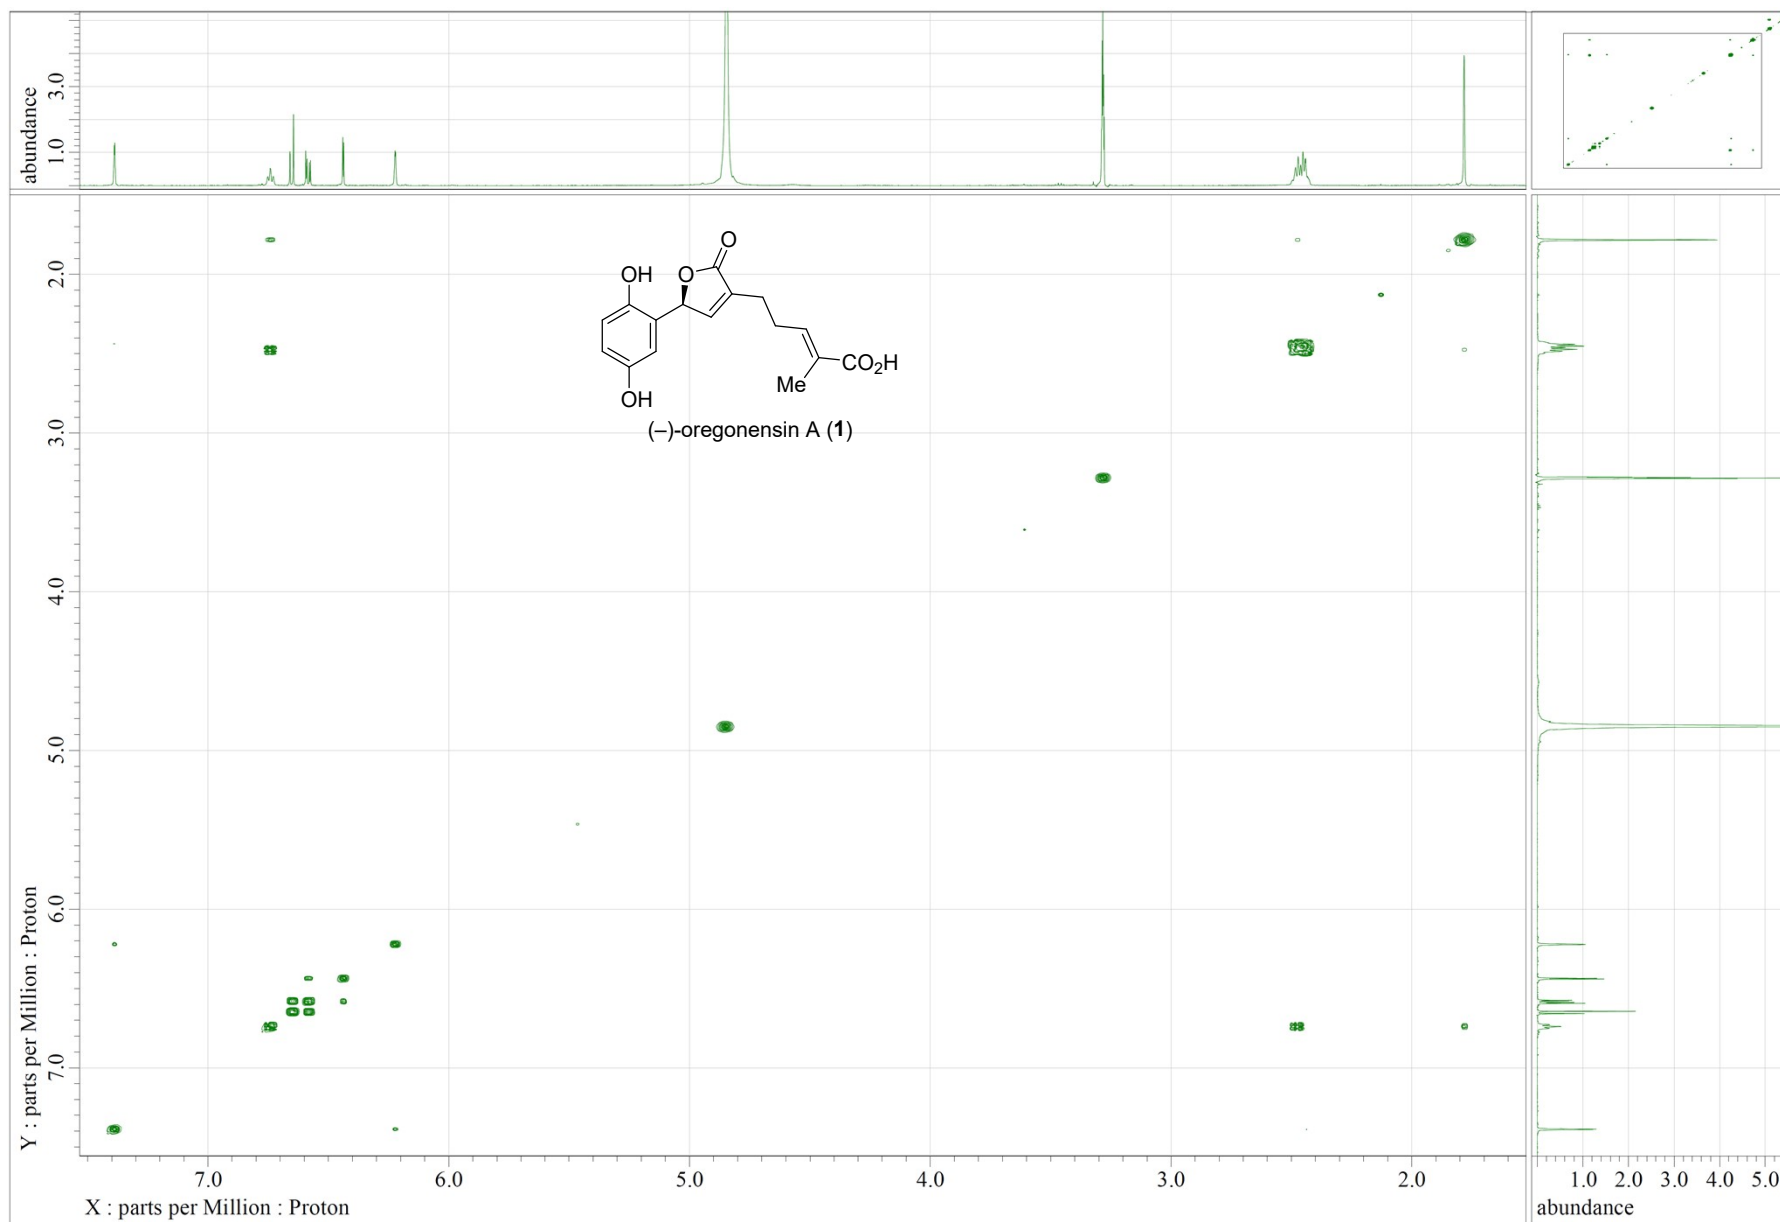

Figure S43. HMQC spectrum of (-)-oregonensin A (1).

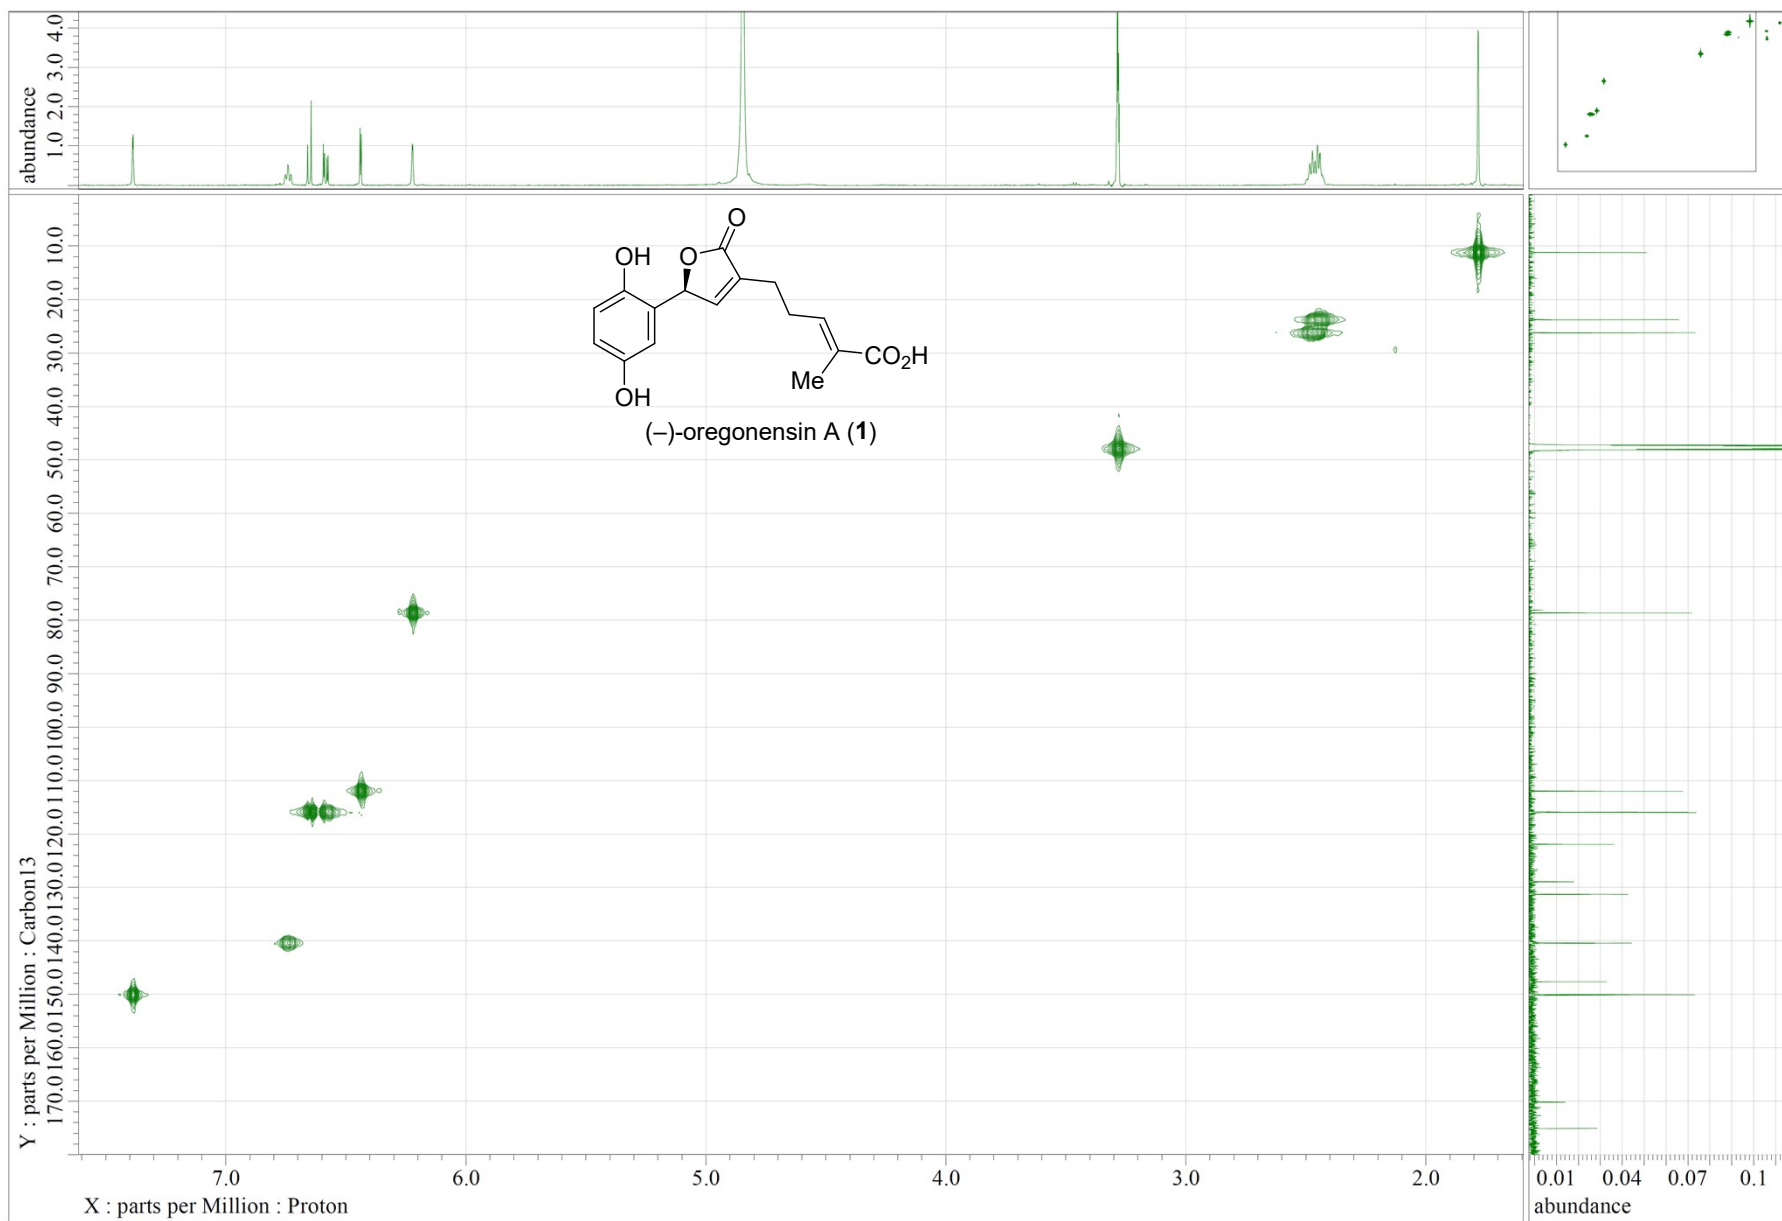

Figure S44. HMBC spectrum of (-)-oregonensin A (1).

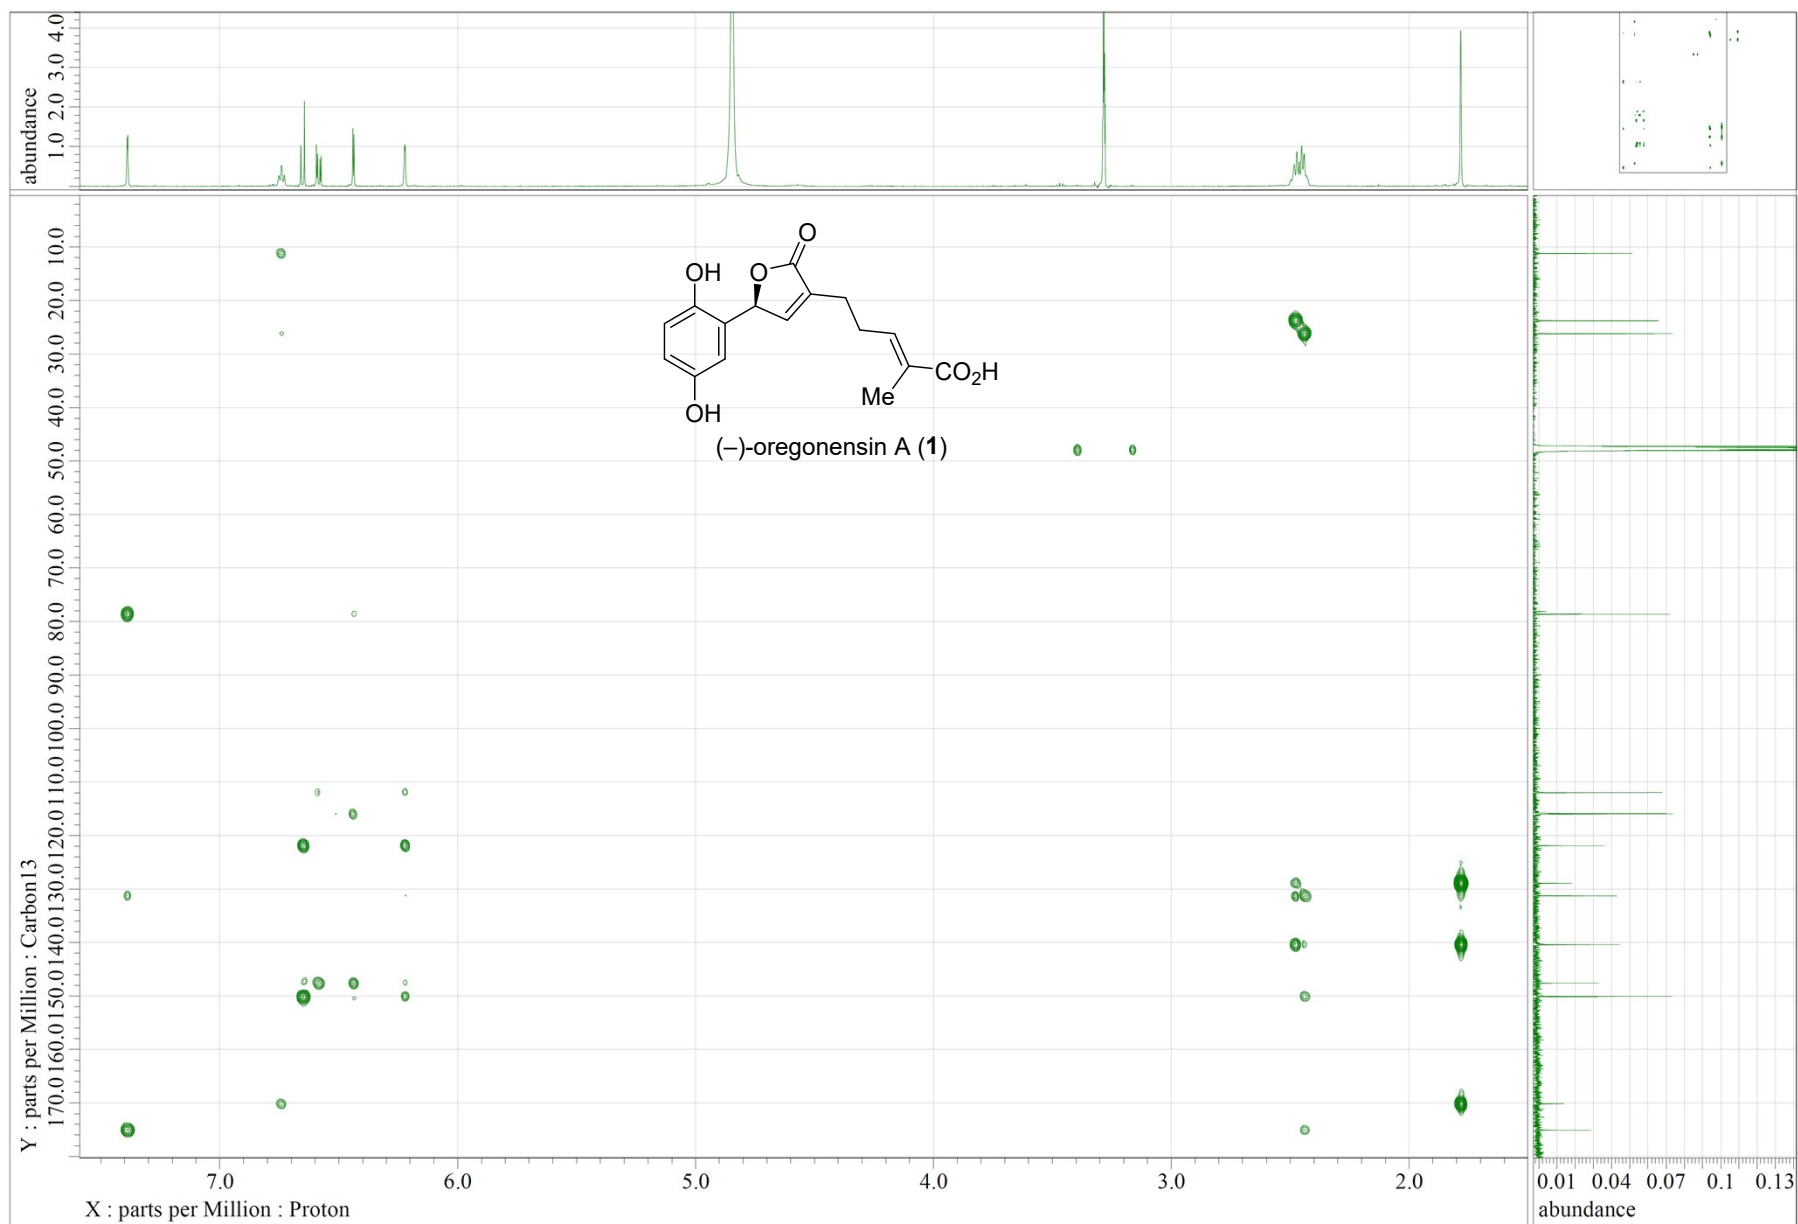

## 5. References

- S1) Xu, C.; Bai, X.; Xu, J.; Ren, J.; Xing, Y.; Li, Z.; Wang, J.; Shi, J.; Yu, L.; Wang, Y. *RSC Adv.* **2017**, *7*, 4763–4775.
- S2) Guo, X.; Mayr, H. *J. Am. Chem. Soc.* **2013**, *135*, 12377–12387.
- S3) (a) Andresen, G.; Eriksen, A. B.; Dalhus, B.; Gundersen L. -L.; Rise, F. *J. Chem. Soc., Perkin Trans. 1* **2001**, 1662–1672. (b) Gaich, T.; Mulzer, J. *Org. Lett.* **2010**, *12*, 272–275.
